# Supplementary material for: Enantioselective [1,2]-Stevens rearrangement of thiosulfonates to construct dithio-substituted quaternary carbon centers
Source: Royal Society of Chemistry journal article supplement (doi:10.1039/d2sc00419d), 2022-01-01
Supplement: d2sc00419d1.pdf [file d2sc00419d1.pdf]

## Supporting Information

# Enantioselective [1,2]-Stevens Rearrangement of Thiosulfonates to Construct Dithio-Substituted Quaternary Carbon Centers

Linfeng Hu, Jinzhao Li, Yongyan Zhang, Xiaoming Feng and Xiaohua Liu\*  
Key Laboratory of Green Chemistry & Technology, Ministry of Education, College of  
Chemistry, Sichuan University, Chengdu 610064, China  
E-mail: liuxh@scu.edu.cn

## content

|                                                                                                  |    |
|--------------------------------------------------------------------------------------------------|----|
| 1. General information .....                                                                     | 3  |
| 2. General procedure for the synthesis of chiral guanidines.....                                 | 3  |
| 3. Typical procedure for the synthesis of the benzenesulfonothioate and $\alpha$ -diazoesters .. | 4  |
| 4. Typical procedure for the catalytic asymmetric reactions.....                                 | 4  |
| 5. General procedure for the preparation of the racemic products .....                           | 5  |
| 6. Optimization of reaction conditions.....                                                      | 5  |
| 7. The analytical and spectral characterization data of the products.....                        | 9  |
| 8. Copies of NMR spectra of products.....                                                        | 44 |
| 9. Unsuccessful substrate scopes.....                                                            | 93 |
| 10. X-ray crystal structure of product D1 .....                                                  | 93 |
| 11. References .....                                                                             | 94 |

## 1. General information

$^1\text{H}$  NMR spectra were recorded on Bruker ASCENDTM 400M (400MHz) and ASCENDTM 600M (600MHz). Chemical shifts were reported in ppm from tetramethylsilane with the solvent resonance as the internal standard ( $\text{CDCl}_3$ ,  $\delta = 7.26$ ). Spectra were reported as follows: chemical shift ( $\delta$  ppm), multiplicity (s = singlet, d = doublet, t = triplet, q = quartet, m = multiplet), coupling constants (Hz), integration and assignment.  $^{13}\text{C}\{^1\text{H}\}$  NMR data were collected on ASCENDTM 400M (101 MHz) and ASCENDTM 600M (153 MHz) with complete proton decoupling. Chemical shifts were reported in ppm from the tetramethylsilane with the solvent resonance as internal standard ( $\text{CDCl}_3$ ,  $\delta = 77.0$ ).  $^{19}\text{F}$  NMR spectra were collected on Bruker ASCENDTM 400M (376 MHz) with complete proton decoupling. HRMS was recorded on a Q-Exactive hybrid quadrupole-Orbitrap mass spectrometer (ESI). IR spectra was detected by Bruker Tensor II spectrometer with Plantium ATR accessory. Enantiomeric excesses were determined by chiral HPLC analysis on Daicel Chiral IA, ODH, and IB at 23 °C with UV detector at 254 nm in comparison with the authentic racemates. Optical rotations were tested with a path length of 1 dm (using the sodium D line, 589 nm) and reported as follows:  $[\alpha]_D^{25}$  (c, g/100 mL). Silica gel for thin-layer chromatography (HG/T2354-92) made in Qingdao Haiyang Chemical Co., Ltd. Melting point ranges were determined on OptiMelt. X-ray crystallographic data were collected by a Bruker D8 Venture Photon II. All the solvents were purified by usual methods before use or directly use the super dried solvents.

## 2. General procedure for the synthesis of chiral guanidines.

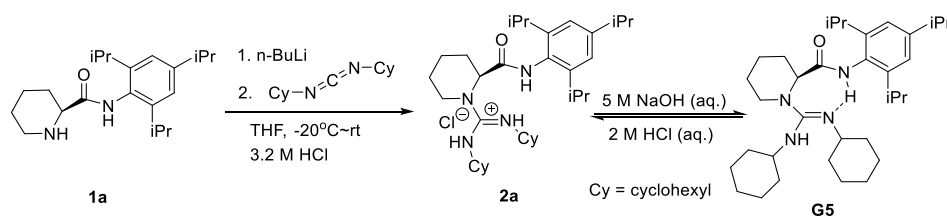

Solution of *n*-BuLi in *n*-hexane (2.4 M, 2.2 equiv, 3.7 mL, 8.8 mmol) was injected into a solution of *L*-pipecolic acid-derived amide **1a** (4.0 mmol) in THF (40 mL) dropwise over 5 minutes under nitrogen atmosphere at -20 °C with well stirring. After additional 10 minutes, a solution of *N,N'*-dicyclohexylcarbodiimide (1.2 equiv, 4.8 mmol) in 10 mL of THF was added dropwise within 5 minutes. The reaction was allowed to warm to room temperature and detected by TLC. After 12 h, the mixture was evaporated under reduced pressure to get rid of THF, and the pH value of the mixture was brought into the range of 0–1 by the addition of 2 M HCl. The aqueous phase was extracted with  $\text{CH}_2\text{Cl}_2$  (3  $\times$  30 mL). The combined organic phase was washed with brine, dried over anhydrous  $\text{Na}_2\text{SO}_4$ , evaporated in vacuum, and purified through flash chromatograph on silica gel (EtOAc:MeOH = 40:1) to produce **2a**. The white foam **2a** can be recrystallized in  $\text{CH}_2\text{Cl}_2$  and petroleum ether to get white crystal. Then, **2a** in  $\text{CH}_2\text{Cl}_2$  (10 mL) was added 4 M NaOH (15 mL) and stirred until the basification was finished (10 minutes). The pH value of the mixture was kept in the range of 11–12. The aqueous phase was extracted with  $\text{CH}_2\text{Cl}_2$  (3  $\times$  20 mL). The combined organic phase was washed with 4 M NaOH, dried over anhydrous  $\text{Na}_2\text{SO}_4$  and evaporated in vacuum. Finally a white solid was obtained. Then it was dissolved in  $\text{CH}_2\text{Cl}_2$  and filtration through celite to remove the silicone gel, concentrate to get a kind of white foam **G5** (41% yield). For other guanidine catalyts, this synthesis method could be applied.<sup>1</sup>

### 3. Typical procedure for the synthesis of the benzenesulfonothioate and $\alpha$ -diazoesters

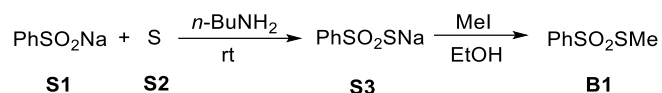

A mixture of **S1** (6.56 g, 40 mmol) and **S2** (1.28 g, 40 mmol) in *n*-BuNH<sub>2</sub> (40 mL) was stirred at room temperature for 0.5 h. After removal of the solvent under reduced pressure, the residue was washed by Et<sub>2</sub>O to obtain a white solid **S3**. Then **S3** was dissolved in EtOH (40 mL), then CH<sub>3</sub>I (11.36 g, 80 mmol) was added to the solution. The reaction mixture was stirred at 40–45 °C for 24 h. After removal of the solvent under reduced pressure, the reaction mixture was poured on a solution of Na<sub>2</sub>S<sub>2</sub>O<sub>3</sub> and CH<sub>2</sub>Cl<sub>2</sub> (30 mL). The precipitate was filtered and dried by anhydrous Na<sub>2</sub>SO<sub>4</sub>, the residue was purified through column chromatography (petroleum ether: EtOAc = 20:1) to afford the desired reactant **B1** (3.1 g, 40% yield) as a yellow oil. The other substrates were obtained by the similar method.<sup>2</sup>

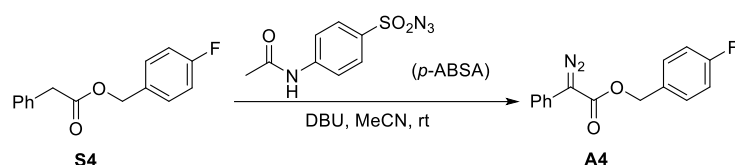

To a solution of **S4** (2.44 g, 10 mmol) and *p*-ABSA (3.12 g, 13 mmol) in dry CH<sub>3</sub>CN (20 mL) was added DBU (1.94 mL, 13 mmol) dropwise at 0 °C. Then the mixture was stirred overnight at room temperature. The reaction was then quenched with 10 w% NH<sub>4</sub>Cl, followed by extraction with Et<sub>2</sub>O (2 × 20 mL). The combined organic extracts were anhydrous Na<sub>2</sub>SO<sub>4</sub>, filtered and concentrated under reduced pressure. The yellow crude product was purified by silica gel column chromatography (petroleum ether:Et<sub>2</sub>O = 30:1) to give the product **A4** as a yellow solid (2.3 g, 84% yield). The other  $\alpha$ -aryl  $\alpha$ -diazoesters were prepared by the similar procedure.<sup>3</sup>

### 4. Typical procedure for the catalytic asymmetric reactions

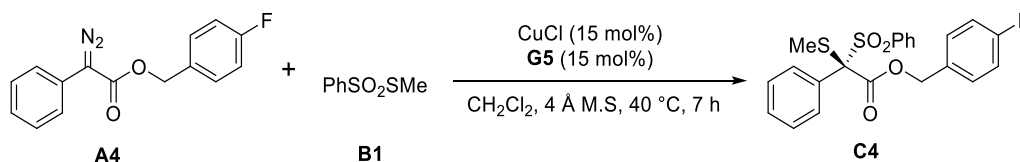

Typical Procedure: To an oven-dried reaction tube under nitrogen atmosphere was added CuCl (1.5 mg, 15 mol%), **G5** (8.1 mg, 15 mol%), 4 Å MS (60 mg), and CH<sub>2</sub>Cl<sub>2</sub> (0.5 mL). The reaction mixture was stirred at 40 °C for 10 min. Subsequently, **B1** (15.0  $\mu$ L, 0.1 mmol) was added, then 4-fluorobenzyl 2-diazo-2-phenylacetate **A4** (53.0 mg, 0.2 mmol) dissolving in CH<sub>2</sub>Cl<sub>2</sub> (0.5 mL) was added dropwise and the reaction mixture was stirred at 40 °C for 7 h, then directly purified by flash column chromatography (petroleum ether:EtOAc = 5:1) to afford the desired product **C4**.



## 5. General procedure for the preparation of the racemic products

The corresponding racemic products were obtained through the use of racemic guanidine under the same reaction conditions

## 6. Optimization of reaction conditions

**Table S1.** Screening of metal salts<sup>a</sup>

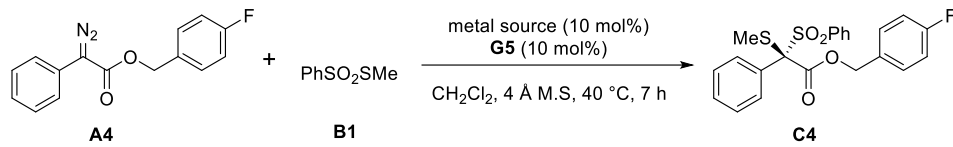

| entry | metal source                                        | yield <sup>b</sup> % | er <sup>c</sup> |
|-------|-----------------------------------------------------|----------------------|-----------------|
| 1     | CuCl                                                | 75                   | 91.5:8.5        |
| 2     | CuI                                                 | n. r.                | \               |
| 3     | CuBr                                                | trace                | \               |
| 4     | CuTc                                                | trace                | \               |
| 5     | Cu(CH <sub>3</sub> CN) <sub>4</sub> PF <sub>6</sub> | 58                   | 81:19           |
| 6     | Cu(CH <sub>3</sub> CN) <sub>4</sub> BF <sub>4</sub> | 77                   | 83.5:16.5       |
| 7     | CuOTf                                               | 58                   | 70.5:29.5       |
| 8     | CuCl <sub>2</sub>                                   | 72                   | 86:14           |
| 9     | Cu(OTf) <sub>2</sub>                                | 63                   | 77.5:22.5       |
| 10    | Rh <sub>2</sub> (OAc) <sub>4</sub>                  | 32                   | racemic         |
| 11    | Pd <sub>2</sub> (dba) <sub>3</sub>                  | 27                   | racemic         |
| 12    | AgOTf                                               | 30                   | racemic         |
| 13    | Fe(acac) <sub>3</sub>                               | n. r.                | \               |
| 14    | AuPPh <sub>3</sub> Cl                               | trace                | \               |

<sup>a</sup>Unless otherwise noted, all reactions were carried out with metal source (10 mol%), 4 Å MS (60 mg), **G5** (10 mol%), **A4** (0.20 mmol), and **B1** (0.10 mmol) in CH<sub>2</sub>Cl<sub>2</sub> (1.0 mL) at 40 °C for 7 h.

<sup>b</sup>Isolated yield. <sup>c</sup>Determined by chiral HPLC analysis. n. r. = No reaction.

**Table S2.** Screening of chiral guanidines<sup>a</sup>

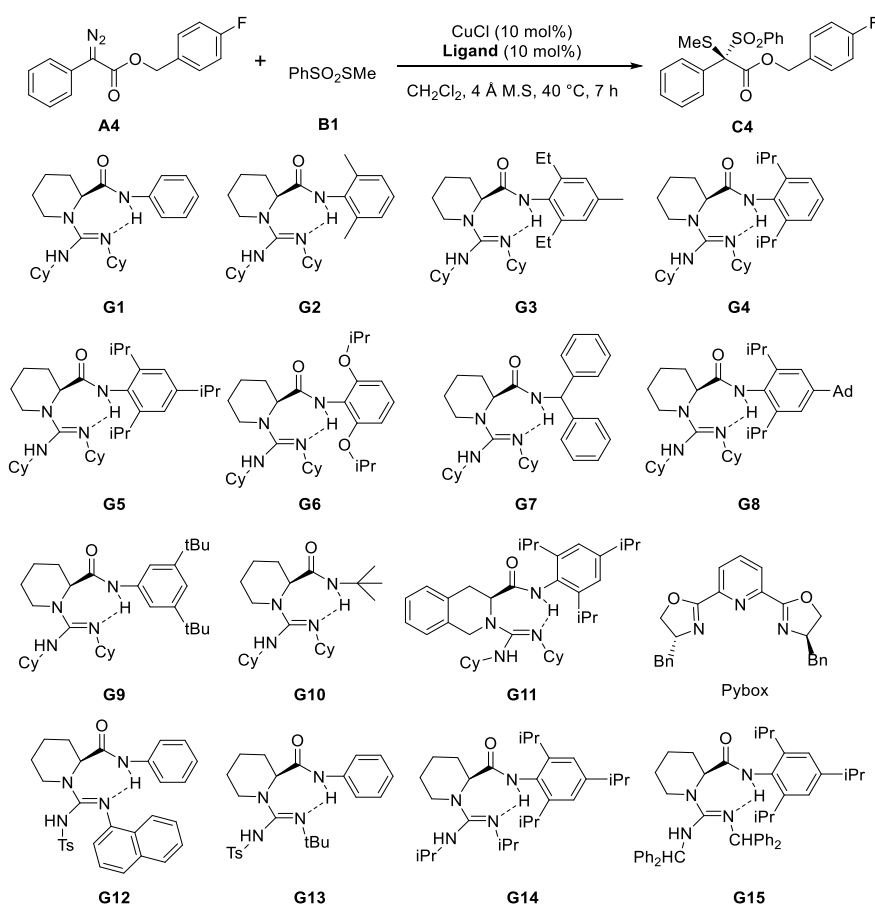

| entry | Ligand       | yield <sup>b</sup> % | er <sup>c</sup> . |
|-------|--------------|----------------------|-------------------|
| 1     | <b>G1</b>    | 32                   | 50:50             |
| 2     | <b>G2</b>    | 76                   | 76.5:23.5         |
| 3     | <b>G3</b>    | 81                   | 87:13             |
| 4     | <b>G4</b>    | 52                   | 86:14             |
| 5     | <b>G5</b>    | 75                   | 91.5:8.5          |
| 6     | <b>G6</b>    | 70                   | 73:27             |
| 7     | <b>G7</b>    | 57                   | 60:40             |
| 8     | <b>G8</b>    | 74                   | 87.5:12.5         |
| 9     | <b>G9</b>    | 30                   | 52:48             |
| 10    | <b>G10</b>   | trace                | \                 |
| 11    | <b>G11</b>   | 78                   | 75:25             |
| 12    | <b>Pybox</b> | 62                   | 50:50             |
| 13    | <b>G12</b>   | 33                   | 50:50             |
| 14    | <b>G13</b>   | 43                   | 50:50             |
| 15    | <b>G14</b>   | 63                   | 90:10             |
| 16    | <b>G15</b>   | 70                   | 80:20             |

<sup>a</sup>Unless otherwise noted, all reactions were carried out with **CuCl** (10 mol%), 4 Å MS (60 mg), **Ligand** (10 mol%), **A4** (0.20 mmol), and **B1** (0.10 mmol) in  $\text{CH}_2\text{Cl}_2$  (1.0 mL) at 40 °C for 7 h.

<sup>b</sup>Isolated yield. <sup>c</sup>Determined by chiral HPLC analysis. n. r. = No reaction.

**Table S3.** Screening of the solvents<sup>a</sup>

| entry           | solvent                              | yield <sup>b</sup> % | er <sup>c</sup> . |
|-----------------|--------------------------------------|----------------------|-------------------|
| 1               | THF                                  | n. r.                | \                 |
| 2               | PhMe                                 | 35                   | 61.5:38.5         |
| 3               | MTBE                                 | n. r.                | \                 |
| 4               | CH <sub>3</sub> CN                   | n. r.                | \                 |
| 5               | EtOAc                                | n. r.                | \                 |
| 6               | MeOH                                 | trace                | \                 |
| 7               | CCl <sub>4</sub>                     | 51                   | racemic           |
| 8               | CH <sub>2</sub> ClCH <sub>2</sub> Cl | 62                   | 80.5:19.5         |
| 9               | CHCl <sub>2</sub> CHCl               | 70                   | 86:14             |
| 10              | CHCl <sub>2</sub> CHCl <sub>2</sub>  | 61                   | 73.5:26.5         |
| 11              | CHCl <sub>3</sub>                    | 28                   | 56.5:43.5         |
| 12              | CH <sub>2</sub> Cl <sub>2</sub>      | 75                   | 91.5:8.5          |
| 13 <sup>d</sup> | CH <sub>2</sub> Cl <sub>2</sub>      | 88                   | 90.5:9.5          |
| 14 <sup>e</sup> | CH <sub>2</sub> Cl <sub>2</sub>      | 86                   | 90:10             |

<sup>a</sup>Unless otherwise noted, all reactions were carried out with CuCl (10 mol%), 4 Å MS (60 mg), **G5** (10 mol%), **A4** (0.20 mmol), and **B1** (0.10 mmol) in CH<sub>2</sub>Cl<sub>2</sub> (1.0 mL) at 40 °C for 7 h. <sup>b</sup>Isolated yield. <sup>c</sup>Determined by chiral HPLC analysis. n. r. = No reaction. <sup>d</sup>4 Å MS (30 mg) was added. <sup>e</sup>4 Å MS (90 mg) was added.

**Table S4.** Screening of reaction temperature<sup>a</sup>

| entry          | Temp (°C)/time | yield <sup>b</sup> % | er <sup>c</sup> . |
|----------------|----------------|----------------------|-------------------|
| 1 <sup>d</sup> | 10 / 12 h      | trace                | \                 |
| 2 <sup>e</sup> | 25 / 10 h      | 54                   | 77.5:22.5         |
| 3              | 35 / 7 h       | 82                   | 91:9              |
| 4              | 40 / 7h        | 75                   | 91.5:8.5          |

<sup>a</sup>Unless otherwise noted, all reactions were carried out with CuCl (10 mol%), 4 Å MS (60 mg), **G5** (10 mol%), **A4** (0.20 mmol), and **B1** (0.10 mmol) in CH<sub>2</sub>Cl<sub>2</sub> (1.0 mL) at x °C for 7 h. <sup>b</sup>Isolated yield. <sup>c</sup>Determined by chiral HPLC analysis. n. r. = No reaction.

**Table S5.** Screening of the additives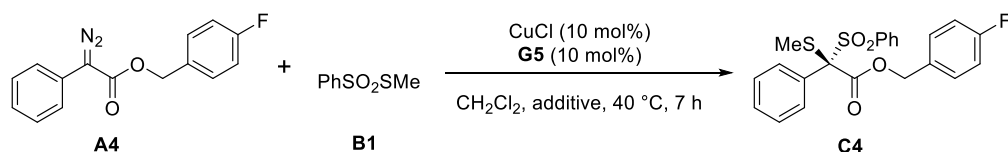

| entry | additive                        | yield <sup>b</sup> % | er <sup>c</sup> . |
|-------|---------------------------------|----------------------|-------------------|
| 1     | –                               | 18                   | 67.5:32.5         |
| 2     | 3 Å MS (60 mg)                  | 47                   | 90:10             |
| 3     | 4 Å MS (60 mg)                  | 75                   | 91.5:8.5          |
| 4     | 5 Å MS (60 mg)                  | 73                   | 89:11             |
| 5     | H <sub>2</sub> O                | 67                   | 87.5:12.5         |
| 6     | MeOH                            | 38                   | 75.5:24.5         |
| 7     | PhCOOH                          | 68                   | 89:11             |
| 8     | LiCl                            | 71                   | 90:10             |
| 9     | LiBr                            | 73                   | 76.5:23.5         |
| 10    | NaBAr <sup>F</sup> <sub>4</sub> | 43                   | racemic           |
| 11    | Et <sub>3</sub> N               | 47                   | racemic           |

<sup>a</sup>Unless otherwise noted, all reactions were carried out with CuCl (10 mol%), additive (10 mol%), **G5** (10 mol%), **A4** (0.20 mmol), and **B1** (0.10 mmol) in CH<sub>2</sub>Cl<sub>2</sub> (1.0 mL) at 40 °C for 7 h. <sup>b</sup>Isolated yield. <sup>c</sup>Determined by chiral HPLC analysis. n. r. = No reaction.

**Table S6.** Screening of the ratio between guanidine and copper salt

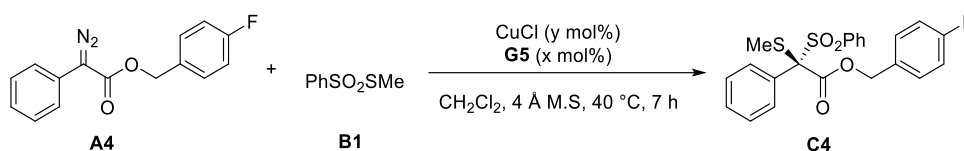

| entry          | x:y   | yield <sup>b</sup> % | er <sup>c</sup> . |
|----------------|-------|----------------------|-------------------|
| 1              | 15:10 | 77                   | 89:11             |
| 2              | 12:10 | 78                   | 89.5:10.5         |
| 3              | 10:10 | 75                   | 91.5:8.5          |
| 4              | 10:15 | 65                   | 81.5:18.5         |
| 5              | 10:20 | 66                   | 75:25             |
| 6 <sup>d</sup> | 15:15 | 78                   | 92:8              |
| 7 <sup>e</sup> | 20:20 | 82                   | 92:8              |
| 8 <sup>f</sup> | 30:30 | 96                   | 92.5:7.5          |

<sup>a</sup>Unless otherwise noted, all reactions were carried out with CuCl (y mol%), 4 Å MS (60 mg), **G5** (x mol%), **A4** (0.20 mmol), and **B1** (0.10 mmol) in CH<sub>2</sub>Cl<sub>2</sub> (1.0 mL) at 40 °C for 7 h. <sup>b</sup>Isolated yield. <sup>c</sup>Determined by chiral HPLC analysis. n. r. = No reaction. <sup>d</sup>CuCl (15 mol%), **G5** (15 mol%). <sup>e</sup>CuCl (20 mol%), **G5** (20 mol%). <sup>f</sup>CuCl (30 mol%), **G5** (30 mol%).

### S7. Other types of $\alpha$ -diazoesters

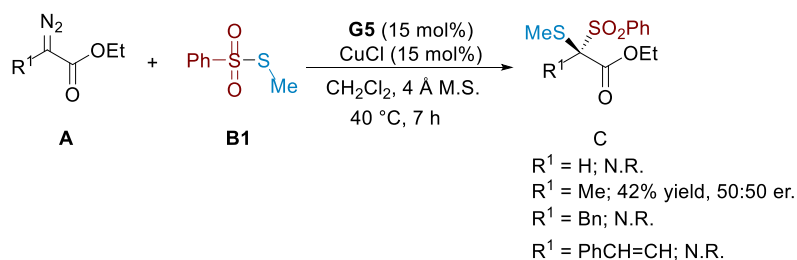

## 7. The analytical and spectral characterization data of the products

### 4-fluorobenzyl (S)-2-(methylthio)-2-phenyl-2-(phenylsulfonyl)acetate (C4)

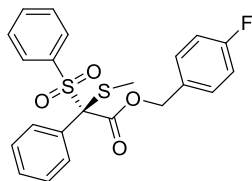

Yellow liquid . 78% yield, 92:8 er.  $[\alpha]^{21.3}_D = +33.7$  ( $c = 0.64$  in  $\text{CH}_2\text{Cl}_2$ ). Dissolved in hexane for HPLC; HPLC (Chiral IA column,  $i$ -PrOH/n-hexane = 10/90, flow rate: 1.0 mL/min, 254 nm),  $t_R(\text{major}) = 17.17$  min,  $t_R(\text{minor}) = 21.22$  min.

$^1\text{H NMR}$  (400 MHz, Chloroform- $d$ )  $\delta = 7.54 - 7.45$  (m, 1H), 7.42 - 7.33 (m, 4H), 7.33 - 7.29 (m, 1H), 7.28 - 7.23 (m, 2H), 7.23 - 7.14 (m, 2H), 7.16 - 7.11 (m, 2H), 7.03 (t,  $J = 8.8$  Hz, 2H), 5.37 - 5.23 (m, 2H), 2.29 (s, 3H).

$^{13}\text{C NMR}$  (101 MHz, Chloroform- $d$ )  $\delta = 165.7, 162.9$  (d, 249.0 Hz), 135.4, 133.7, 131.4, 131.3, 130.9 (d, 8.4 Hz), 130.4 (d, 3.3 Hz), 129.6, 129.4, 127.9, 127.6, 115.5 (d, 21.7 Hz), 82.8, 67.6, 15.2.

$^{19}\text{F NMR}$  (376 MHz, Chloroform- $d$ )  $\delta = -112.58$ .

**IR** (neat): 2926, 1733, 1604, 1510, 1446, 1372, 1311, 1214, 1144, 1079, 1008, 967  $\text{cm}^{-1}$ .

**HRMS** (ESI) calcd for  $m/z$ : ( $[\text{M}]+\text{K}^+$ )  $\text{C}_{22}\text{H}_{19}\text{FO}_4\text{S}_2\text{K}^+ = 469.0340$ , Found 469.0334.

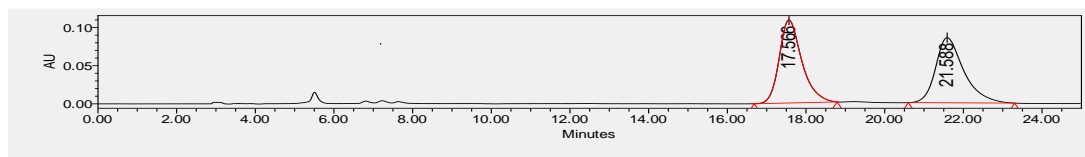

|   | Retention Time | Area    | % Area |
|---|----------------|---------|--------|
| 1 | 17.566         | 4331351 | 50.54  |
| 2 | 21.588         | 4239486 | 49.46  |

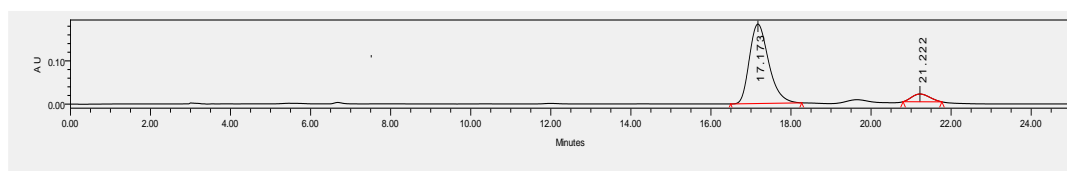

|   | Retention Time | Area    | % Area |
|---|----------------|---------|--------|
| 1 | 17.173         | 6169177 | 92.00  |
| 2 | 21.222         | 536770  | 8.00   |

**4-chlorobenzyl (S)-2-(methylthio)-2-phenyl-2-(phenylsulfonyl)acetate (C5)**

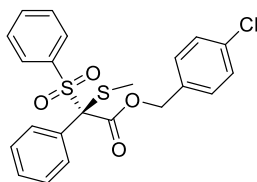

Yellow liquid. 71% yield, 90:10 er.  $[\alpha]_{D}^{27.8} = +36.9$  ( $c = 0.56$  in  $\text{CH}_2\text{Cl}_2$ ). Dissolved in hexane for HPLC; HPLC (Chiral IA column,  $i\text{-PrOH/n-hexane} = 10/90$ , flow rate: 1.0 mL/min, 254 nm),  $t_R(\text{major}) = 18.99$  min,  $t_R(\text{minor}) = 23.90$  min.

$^1\text{H NMR}$  (400 MHz, Chloroform- $d$ )  $\delta = 7.54 - 7.45$  (m, 1H), 7.43 - 7.38 (m, 2H), 7.31 (m, 5H), 7.28 - 7.23 (m, 2H), 7.22 - 7.16 (m, 2H), 7.16 - 7.11 (m, 2H), 5.36 - 5.24 (m, 2H), 2.31 (s, 3H).

$^{13}\text{C NMR}$  (101 MHz, Chloroform- $d$ )  $\delta = 165.7, 135.4, 134.6, 133.7, 133.0, 131.4, 131.3, 130.1, 129.6, 129.4, 128.8, 127.9, 127.6, 82.8, 67.4, 15.3$ .

**IR** (neat): 2927, 1735, 1591, 1492, 1447, 1371, 1314, 1214, 1145, 1084, 1010, 811, 756, 693  $\text{cm}^{-1}$ .

**HRMS** (ESI)  $m/z$ : ( $[\text{M}]+\text{K}^+$ ) calcd for  $\text{C}_{22}\text{H}_{19}^{35}\text{ClO}_4\text{S}_2\text{K}^+ = 485.0045$ , Found 485.0045,

**HRMS** (ESI)  $m/z$ : ( $[\text{M}]+\text{K}^+$ ) calcd for  $\text{C}_{22}\text{H}_{19}^{37}\text{ClO}_4\text{S}_2\text{K}^+ = 487.0015$ , Found 487.0015.

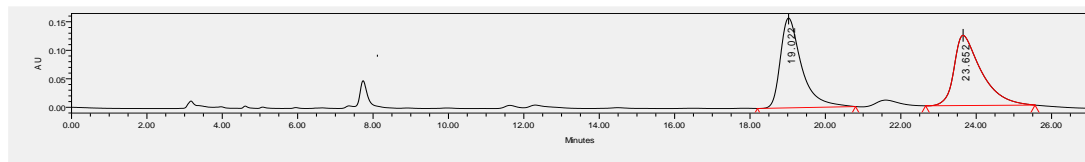

|   | Retention Time | Area    | % Area |
|---|----------------|---------|--------|
| 1 | 19.022         | 6151041 | 49.85  |
| 2 | 23.652         | 6187640 | 50.15  |

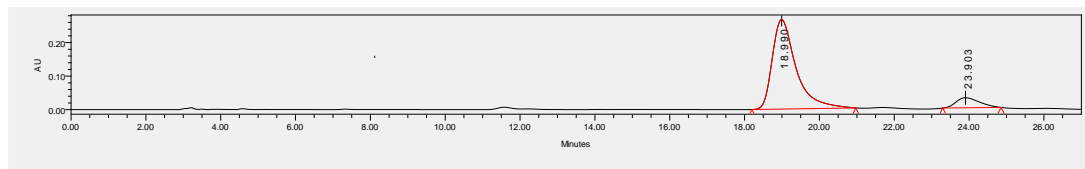

|   | Retention Time | Area     | % Area |
|---|----------------|----------|--------|
| 1 | 18.990         | 11775286 | 90.00  |
| 2 | 23.903         | 1309025  | 10.00  |

**4-bromobenzyl (S)-2-(methylthio)-2-phenyl-2-(phenylsulfonyl)acetate (C6)**

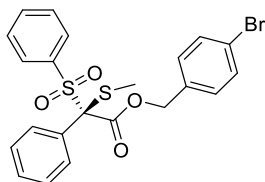

Yellow liquid. 83% yield, 90.5: 9.5 er.  $[\alpha]^{27.1}_D = +19.2$  ( $c = 0.30$  in  $\text{CH}_2\text{Cl}_2$ ). Dissolved in hexane for HPLC; HPLC (Chiral IA column,  $i\text{-PrOH}/n\text{-hexane} = 10/90$ , flow rate: 1.0 mL/min, 254 nm),  $t_R(\text{major}) = 19.78$  min,  $t_R(\text{minor}) = 24.69$  min.

**$^1\text{H NMR}$**  (400 MHz, Chloroform- $d$ )  $\delta = 7.54 - 7.44$  (m, 3H), 7.42 - 7.39 (m, 2H), 7.36 - 7.30 (m, 1H), 7.28 - 7.23 (m, 4H), 7.21 - 7.16 (m, 2H), 7.16 - 7.11 (m, 2H), 5.36 - 5.21 (m, 2H), 2.31 (s, 3H).

**$^{13}\text{C NMR}$**  (101 MHz, Chloroform- $d$ )  $\delta = 165.7, 135.4, 133.7, 133.5, 131.8, 131.4, 131.3, 130.4, 129.6, 129.4, 127.9, 127.6, 122.8, 82.8, 67.4, 15.3$ .

**IR** (neat): 3063, 1734, 1589, 1488, 1446, 1370, 1311, 1212, 1144, 1076, 1008  $\text{cm}^{-1}$ .

**HRMS** (ESI)  $m/z$ : ( $[\text{M}]+\text{K}^+$ ) calcd for  $\text{C}_{22}\text{H}_{19}^{79}\text{BrO}_4\text{S}_2\text{K}^+ = 528.9539$ , Found 528.9534.

**HRMS** (ESI)  $m/z$ : ( $[\text{M}]+\text{K}^+$ ) calcd for  $\text{C}_{22}\text{H}_{19}^{81}\text{BrO}_4\text{S}_2\text{K}^+ = 530.9519$ , Found 530.9515.

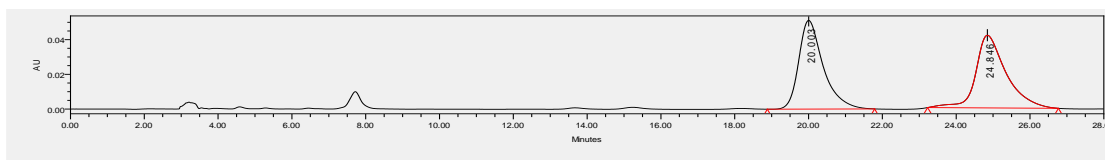

|   | Retention Time | Area    | % Area |
|---|----------------|---------|--------|
| 1 | 20.003         | 2354760 | 49.63  |
| 2 | 24.846         | 2389769 | 50.37  |

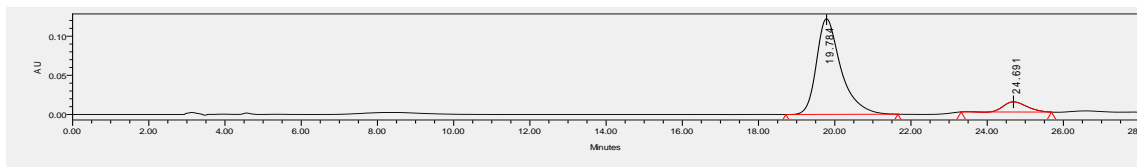

|   | Retention Time | Area    | % Area |
|---|----------------|---------|--------|
| 1 | 19.784         | 5455293 | 90.65  |
| 2 | 24.691         | 562613  | 9.35   |

**3,5-difluorobenzyl (S)-2-(methylthio)-2-phenyl-2-(phenylsulfonyl)acetate (C7)**

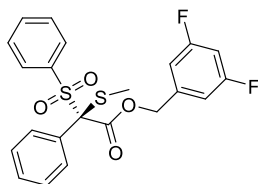

Colorless liquid. 90% yield, 91.5:8.5 er.  $[\alpha]_{D}^{27.5} = +39.7$  ( $c = 0.59$  in  $\text{CH}_2\text{Cl}_2$ ). Dissolved in hexane for HPLC; HPLC (Chiral IA column,  $i$ -PrOH/ $n$ -hexane = 10/90, flow rate: 1.0 mL/min, 254 nm),  $t_R(\text{major}) = 18.30$  min,  $t_R(\text{minor}) = 26.89$  min.

**$^1\text{H}$  NMR** (400 MHz, Chloroform- $d$ )  $\delta = 7.54 - 7.49$  (m, 1H), 7.44 - 7.40 (m, 2H), 7.37 - 7.32 (m, 1H), 7.32 - 7.23 (m, 2H), 7.26 - 7.14 (m, 4H), 6.94 - 6.84 (m, 2H), 6.77 (tt,  $J = 8.9, 2.4$  Hz, 1H), 5.37 - 5.21 (m, 2H), 2.36 (s, 3H).

**$^{13}\text{C}$  NMR** (101 MHz, Chloroform- $d$ )  $\delta = 165.6, 163.0$  (d, 250.6 Hz), 162.9 (d, 250.6 Hz), 138.2 (t, 9.3 Hz), 135.2, 133.8, 131.3, 131.2, 129.7, 129.5, 127.9, 127.7, 110.9 (d, 26.2 Hz), 110.9 (d, 11.7 Hz), 104.0 (t, 25.3 Hz), 82.70, 66.58, 15.30.

**$^{19}\text{F}$  NMR** (376 MHz, Chloroform- $d$ )  $\delta = -108.76$ .

**IR** (neat): 3067, 1738, 1628, 1597, 1450, 1375, 1317, 1216, 1145, 960  $\text{cm}^{-1}$ .

**HRMS** (ESI)  $m/z$ : ( $[\text{M}]+\text{K}^+$ ) calcd for  $\text{C}_{22}\text{H}_{18}\text{F}_2\text{O}_4\text{S}_2\text{K}^+ = 487.0246$ , Found 487.0243.

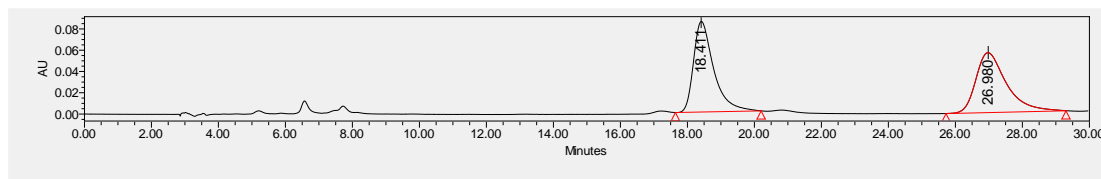

|   | Retention Time | Area    | % Area |
|---|----------------|---------|--------|
| 1 | 18.411         | 3565251 | 49.99  |
| 2 | 26.980         | 3566378 | 50.01  |

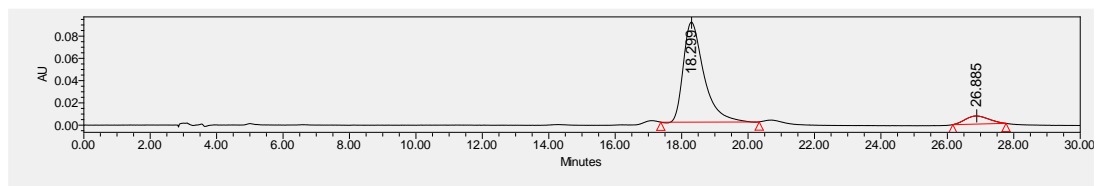

|   | Retention Time | Area    | % Area |
|---|----------------|---------|--------|
| 1 | 18.299         | 3870932 | 91.56  |
| 2 | 26.885         | 357020  | 8.44   |



**3,5-dichlorobenzyl (S)-2-(methylthio)-2-phenyl-2-(phenylsulfonyl)acetate (C8)**

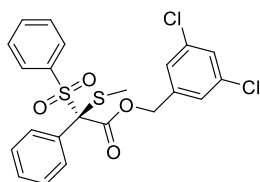

Colorless liquid. 90% yield, 92.5:7.5 er.  $[\alpha]^{28.2}_D = +29.7$  ( $c = 0.33$  in  $\text{CH}_2\text{Cl}_2$ ). Dissolved in hexane for HPLC; HPLC (Chiral IA column,  $i\text{-PrOH}/n\text{-hexane} = 10/90$ , flow rate: 1.0 mL/min, 254 nm),  $t_R(\text{major}) = 18.41$  min,  $t_R(\text{minor}) = 29.05$  min.

$^1\text{H NMR}$  (400 MHz, Chloroform- $d$ )  $\delta = 7.54 - 7.49$  (m, 1H), 7.44 - 7.40 (m, 2H), 7.38 - 7.31 (m, 2H), 7.32 - 7.21 (m, 3H), 7.24 - 7.20 (m, 3H), 7.19 - 7.14 (m, 2H), 5.26 (s, 2H), 2.36 (s, 3H).

$^{13}\text{C NMR}$  (101 MHz, Chloroform- $d$ )  $\delta = 165.5, 137.8, 135.2, 133.8, 131.3, 131.1, 129.7, 129.5, 128.7, 128.0, 127.7, 126.5, 82.6, 66.4, 15.3$ .

**IR** (neat): 2921, 1738, 1571, 1442, 1370, 1315, 1212, 1145, 1079, 855, 797, 755  $\text{cm}^{-1}$ .

**HRMS** (ESI)  $m/z$ : ( $[\text{M}]+\text{K}^+$ ) calcd for  $\text{C}_{22}\text{H}_{18}^{35}\text{Cl}^{35}\text{ClO}_4\text{S}_2\text{K}^+ = 518.9655$ , Found 518.9655.

**HRMS** (ESI)  $m/z$ : ( $[\text{M}]+\text{K}^+$ ) calcd for  $\text{C}_{22}\text{H}_{18}^{35}\text{Cl}^{37}\text{ClO}_4\text{S}_2\text{K}^+ = 520.9626$ , Found 520.9626.

**HRMS** (ESI)  $m/z$ : ( $[\text{M}]+\text{K}^+$ ) calcd for  $\text{C}_{22}\text{H}_{18}^{37}\text{Cl}^{37}\text{ClO}_4\text{S}_2\text{K}^+ = 522.9596$ , Found 522.9596.

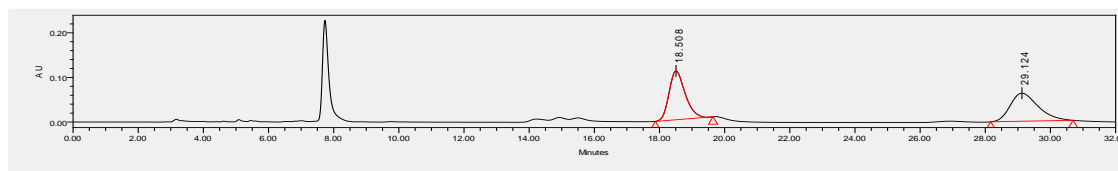

|   | Retention Time | Area    | % Area |
|---|----------------|---------|--------|
| 1 | 18.508         | 3752023 | 50.09  |
| 2 | 29.124         | 3737863 | 49.91  |

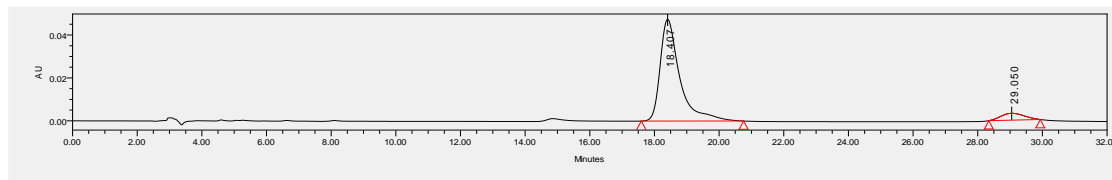

|   | Retention Time | Area    | % Area |
|---|----------------|---------|--------|
| 1 | 18.407         | 1991215 | 92.58  |
| 2 | 29.050         | 159705  | 7.42   |

**3,5-dichlorobenzyl (S)-2-(methylthio)-2-(phenylsulfonyl)-2-(m-tolyl)acetate (C9)**

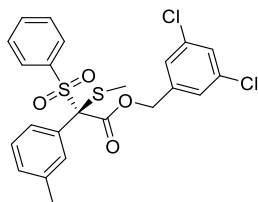

Yellow liquid. 78% yield, 90:10 er.  $[\alpha]_{D}^{27.1} = +30.3$  ( $c = 0.45$  in  $\text{CH}_2\text{Cl}_2$ ). Dissolved in hexane for HPLC; HPLC (Chiral IB column, *i*-PrOH/n-hexane = 20/80, flow rate: 1.0 mL/min, 254 nm),  $t_R(\text{major}) = 10.59$ ,  $t_R(\text{minor}) = 18.12$ .

$^1\text{H NMR}$  (400 MHz, Chloroform-*d*)  $\delta = 7.57 - 7.47$  (m, 1H), 7.45 - 7.41 (m, 2H), 7.34 - 7.25 (m, 3H), 7.22 (d,  $J = 2.0$  Hz, 2H), 7.19 - 7.06 (m, 2H), 6.95 (d,  $J = 7.6$  Hz, 1H), 6.88 (s, 1H), 5.26 (q,  $J = 12.4$  Hz, 2H), 2.36 (s, 3H), 2.20 (s, 3H).

$^{13}\text{C NMR}$  (101 MHz, Chloroform-*d*)  $\delta = 165.6, 137.8, 137.7, 135.2, 133.7, 131.4, 130.9, 130.4, 120.0, 128.7, 127.8, 127.6, 126.6, 126.5, 82.7, 66.3, 21.2, 15.3$ .

**IR** (neat): 3071, 1738, 1571, 1439, 1313, 1207, 1146, 1079, 996, 856, 797  $\text{cm}^{-1}$ .

**HRMS** (ESI)  $m/z$ : ( $[\text{M}]+\text{K}^+$ ) calcd for  $\text{C}_{23}\text{H}_{20}^{35}\text{Cl}^{35}\text{ClO}_4\text{S}_2\text{K}^+ = 532.9812$ , Found 532.9808.

**HRMS** (ESI)  $m/z$ : ( $[\text{M}]+\text{K}^+$ ) calcd for  $\text{C}_{23}\text{H}_{20}^{35}\text{Cl}^{37}\text{ClO}_4\text{S}_2\text{K}^+ = 534.9782$ , Found 534.9778.

**HRMS** (ESI)  $m/z$ : ( $[\text{M}]+\text{K}^+$ ) calcd for  $\text{C}_{23}\text{H}_{20}^{37}\text{Cl}^{37}\text{ClO}_4\text{S}_2\text{K}^+ = 536.9753$ , Found 536.9752.

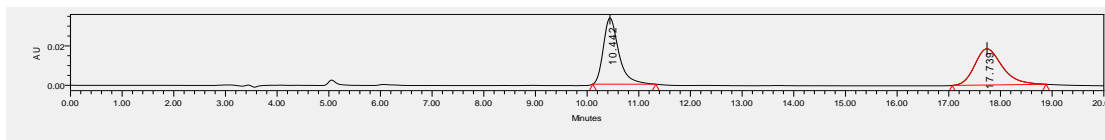

|   | Retention Time | Area   | % Area |
|---|----------------|--------|--------|
| 1 | 10.442         | 695492 | 50.49  |
| 2 | 17.739         | 681908 | 49.51  |

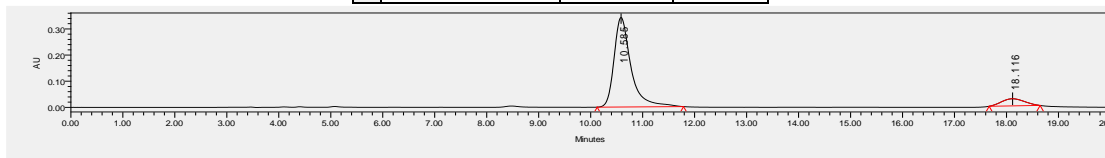

|   | Retention Time | Area    | % Area |
|---|----------------|---------|--------|
| 1 | 10.585         | 7740124 | 90.23  |
| 2 | 18.116         | 837720  | 9.77   |

**3,5-dichlorobenzyl (S)-2-(methylthio)-2-(phenylsulfonyl)-2-(p-tolyl)acetate (C10)**

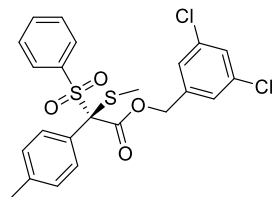

Colorless liquid. 78% yield, 89:11 er.  $[\alpha]_{D}^{27.7} = +34.8$  ( $c = 0.62$  in  $\text{CH}_2\text{Cl}_2$ ). Dissolved in hexane for HPLC; HPLC (Chiral IA column, *i*-PrOH/n-hexane = 10/90, flow rate: 1.0 mL/min, 254 nm),  $t_R(\text{major}) = 20.34$ ,  $t_R(\text{minor}) = 29.86$ .

$^1\text{H NMR}$  (400 MHz, Chloroform-*d*)  $\delta = 7.56 - 7.47$  (m, 1H), 7.47 - 7.43 (m, 2H), 7.34 - 7.25 (m, 3H), 7.21 (d,  $J = 2.0$  Hz, 2H), 7.09 - 6.99 (m, 4H), 5.25 (s, 2H), 2.34 (s, 3H), 2.33 (s, 3H).

$^{13}\text{C NMR}$  (101 MHz, Chloroform-*d*)  $\delta = 165.6, 139.9, 137.9, 135.3, 135.2, 133.7, 131.3, 129.3, 128.7, 128.0, 127.6, 126.5, 82.5, 66.3, 21.2, 15.3$ .

**IR** (neat): 3071, 1739, 1571, 1510, 1439, 1367, 1313, 1211, 1107, 851, 798, 714, 685  $\text{cm}^{-1}$ .

**HRMS** (ESI)  $m/z$ : ( $[\text{M}]+\text{K}^+$ ) calcd for  $\text{C}_{23}\text{H}_{20}^{35}\text{Cl}^{35}\text{ClO}_4\text{S}_2\text{K}^+ = 532.9812$ , Found 532.9810.

**HRMS** (ESI)  $m/z$ : ( $[\text{M}]+\text{K}^+$ ) calcd for  $\text{C}_{23}\text{H}_{20}^{35}\text{Cl}^{37}\text{ClO}_4\text{S}_2\text{K}^+ = 534.9782$ , Found 534.9782.

**HRMS** (ESI)  $m/z$ : ( $[\text{M}]+\text{K}^+$ ) calcd for  $\text{C}_{23}\text{H}_{20}^{37}\text{Cl}^{37}\text{ClO}_4\text{S}_2\text{K}^+ = 536.9753$ , Found 536.9753.

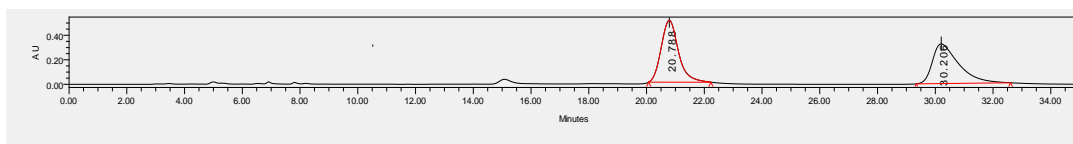

|   | Retention Time | Area     | % Area |
|---|----------------|----------|--------|
| 1 | 20.788         | 20909397 | 50.65  |
| 2 | 30.206         | 20374069 | 49.35  |

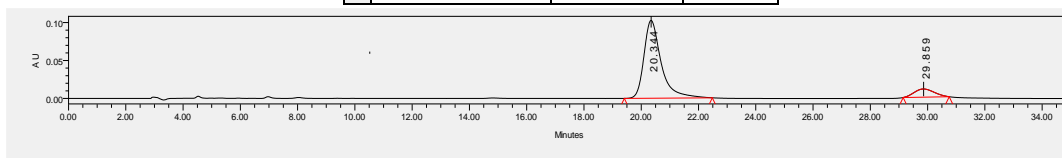

|   | Retention Time | Area    | % Area |
|---|----------------|---------|--------|
| 1 | 20.344         | 4272699 | 89.08  |
| 2 | 29.859         | 523687  | 10.92  |

**3,5-dichlorobenzyl (S)-2-(3,4-dimethylphenyl)-2-(methylthio)-2-(phenylsulfonyl)acetate (C11)**

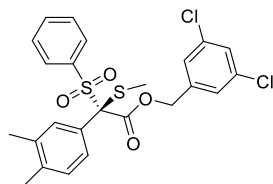

Colorless liquid. 75% yield, 80:20 er.  $[\alpha]_{D}^{27.0} = +25.7$  ( $c = 0.77$  in  $\text{CH}_2\text{Cl}_2$ ). Dissolved in hexane for HPLC; HPLC (Chiral ODH column,  $i$ -PrOH/ $n$ -hexane = 10/90, flow rate: 1.0 mL/min, 254 nm),  $t_R(\text{major}) = 30.05$ ,  $t_R(\text{minor}) = 18.85$ .

$^1\text{H NMR}$  (400 MHz, Chloroform- $d$ )  $\delta = 7.55 - 7.49$  (m, 1H), 7.48 - 7.44 (m, 2H), 7.32 - 7.28 (m, 3H), 7.21 (d,  $J = 1.6$  Hz, 2H), 6.98 (d,  $J = 8.0$  Hz, 1H), 6.90 - 6.80 (m, 2H), 5.25 (q,  $J = 12.8$  Hz, 2H), 2.34 (s, 3H), 2.24 (s, 3H), 2.11 (s, 3H).

$^{13}\text{C NMR}$  (101 MHz, Chloroform- $d$ )  $\delta = 165.7, 138.6, 137.9, 136.3, 135.4, 135.2, 133.7, 131.4, 130.4, 129.1, 128.7, 128.3, 127.5, 126.8, 126.6, 82.6, 66.2, 19.7, 19.5, 15.4$ .

**IR** (neat): 2921, 1739, 1570, 1443, 1372, 1317, 1204, 1145, 1079, 1028, 854, 798, 755, 714  $\text{cm}^{-1}$ .

**HRMS** (ESI)  $m/z$ : ( $[\text{M}]+\text{K}^+$ ) calcd for  $\text{C}_{24}\text{H}_{22}^{35}\text{Cl}^{35}\text{ClO}_4\text{S}_2\text{K}^+ = 546.9968$ , Found 546.9968.

**HRMS** (ESI)  $m/z$ : ( $[\text{M}]+\text{K}^+$ ) calcd for  $\text{C}_{24}\text{H}_{22}^{35}\text{Cl}^{37}\text{ClO}_4\text{S}_2\text{K}^+ = 548.9939$ , Found 548.9939.

**HRMS** (ESI)  $m/z$ : ( $[\text{M}]+\text{K}^+$ ) calcd for  $\text{C}_{24}\text{H}_{22}^{37}\text{Cl}^{37}\text{ClO}_4\text{S}_2\text{K}^+ = 550.9909$ , Found 550.9909.

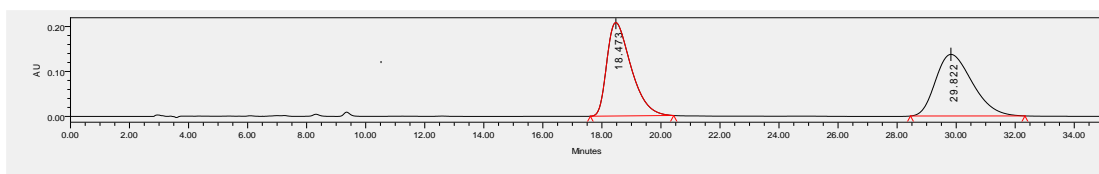

|   | Retention Time | Area     | % Area |
|---|----------------|----------|--------|
| 1 | 18.473         | 11835347 | 50.01  |
| 2 | 29.822         | 11831834 | 49.99  |

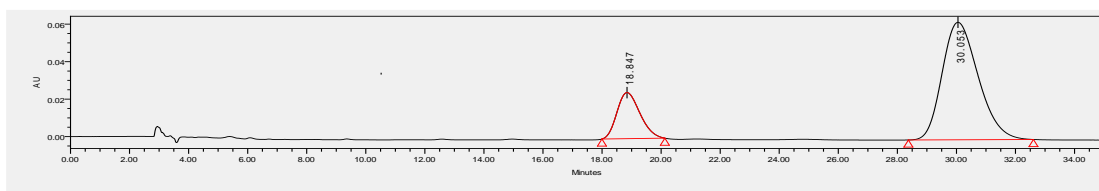

|   | Retention Time | Area    | % Area |
|---|----------------|---------|--------|
| 1 | 18.847         | 1330177 | 20.00  |
| 2 | 30.053         | 5322111 | 80.00  |

**3,5-dichlorobenzyl (S)-2-(3-fluorophenyl)-2-(methylthio)-2-(phenylsulfonyl)acetate (C12)**

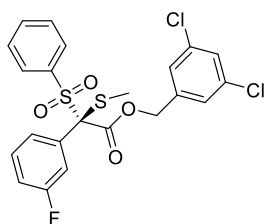

Colorless liquid. 83% yield, 90:10 er.  $[\alpha]_D^{25.9} = +34.8$  ( $c = 0.54$  in  $\text{CH}_2\text{Cl}_2$ ). Dissolved in hexane for HPLC; HPLC (Chiral IA column,  $i$ -PrOH/n-hexane = 20/80, flow rate: 1.0 mL/min, 254 nm),  $t_R(\text{major}) = 11.71$ ,  $t_R(\text{minor}) = 21.37$ .

**$^1\text{H NMR}$**  (400 MHz, Chloroform- $d$ )  $\delta = 7.55$  (t,  $J = 7.4$  Hz, 1H), 7.48 (d,  $J = 8.0$  Hz, 2H), 7.36 – 7.29 (m, 3H), 7.25 – 7.17 (m, 3H), 7.06 (t,  $J = 8.4$  Hz, 1H), 7.00 (d,  $J = 8.0$  Hz, 1H), 6.93 (d,  $J = 10.0$  Hz, 1H), 5.27 (s, 2H), 2.32 (s, 3H).

**$^{13}\text{C NMR}$**  (101 MHz, Chloroform- $d$ )  $\delta = 165.1$ , 161.9 (d, 248.5 Hz), 137.6, 135.2, 134.9, 134.1, 133.3 (d, 7.7 Hz), 131.2, 129.4 (d, 8.1 Hz), 128.8, 127.8, 126.5, 125.4 (d, 3.1 Hz), 117.0, 116.9 (d, 24.4 Hz), 116.7 (d, 21.0 Hz), 82.0, 66.6, 15.3.

**$^{19}\text{F NMR}$**  (376 MHz, Chloroform- $d$ )  $\delta = -111.67$ .

**IR** (neat): 3074, 1739, 1579, 1485, 1438, 1367, 1319, 1208, 1146, 1080, 856, 796, 686  $\text{cm}^{-1}$ .

**HRMS** (ESI)  $m/z$ : ( $[\text{M}]+\text{K}^+$ ) calcd for  $\text{C}_{22}\text{H}_{17}^{35}\text{Cl}^{35}\text{ClFO}_4\text{S}_2\text{K}^+ = 536.9561$ , Found 536.9559.

**HRMS** (ESI)  $m/z$ : ( $[\text{M}]+\text{K}^+$ ) calcd for  $\text{C}_{22}\text{H}_{17}^{35}\text{Cl}^{37}\text{ClFO}_4\text{S}_2\text{K}^+ = 538.9531$ , Found 538.9529.

**HRMS** (ESI)  $m/z$ : ( $[\text{M}]+\text{K}^+$ ) calcd for  $\text{C}_{22}\text{H}_{17}^{37}\text{Cl}^{37}\text{ClFO}_4\text{S}_2\text{K}^+ = 540.9502$ , Found 540.9501.

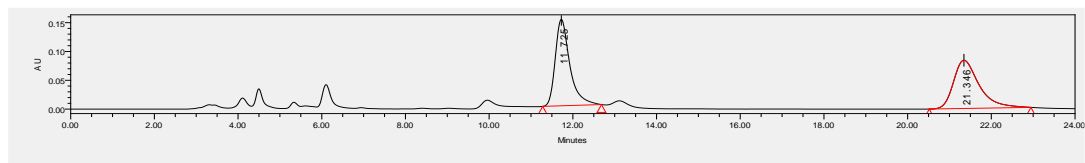

|   | Retention Time | Area    | % Area |
|---|----------------|---------|--------|
| 1 | 11.725         | 3628026 | 50.52  |
| 2 | 21.346         | 3553672 | 49.48  |

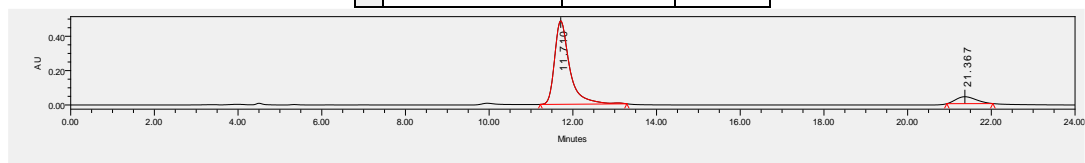

|   | Retention Time | Area     | % Area |
|---|----------------|----------|--------|
| 1 | 11.710         | 12132784 | 90.05  |
| 2 | 21.367         | 1340897  | 9.95   |

**3,5-dichlorobenzyl (S)-2-(4-fluorophenyl)-2-(methylthio)-2-(phenylsulfonyl)acetate (C13)**

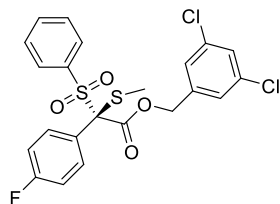

Colorless liquid. 81% yield, 90.5:9.5 er.  $[\alpha]^{26.9}_D = +20.7$  ( $c = 0.23$  in  $\text{CH}_2\text{Cl}_2$ ). Dissolved in hexane for HPLC; HPLC (Chiral IA column,  $i\text{-PrOH/n-hexane} = 5/95$ , flow rate: 1.0 mL/min, 254 nm),  $t_R(\text{major}) = 32.23$ ,  $t_R(\text{minor}) = 34.63$ .

$^1\text{H NMR}$  (400 MHz, Chloroform- $d$ )  $\delta = 7.54$  (t,  $J = 7.4$  Hz, 1H), 7.46 (d,  $J = 8.4$  Hz, 2H), 7.36 – 7.27 (m, 3H), 7.24 (s, 2H), 7.20 – 7.15 (m, 2H), 6.93 (t,  $J = 8.4$  Hz, 2H), 5.27 (s, 2H), 2.32 (s, 3H).

$^{13}\text{C NMR}$  (101 MHz, Chloroform- $d$ )  $\delta = 165.4$ , 163.2 (d, 252.6 Hz), 137.7, 135.2, 135.0, 134.0, 131.6 (d, 8.6 Hz), 131.2, 128.8, 127.8, 127.0 (d, 3.6 Hz), 126.5, 115.1 (d, 22.0 Hz), 81.8, 66.5, 15.3.

$^{19}\text{F NMR}$  (376 MHz, Chloroform- $d$ )  $\delta = -110.27$ .

**IR** (neat): 3074, 1738, 1571, 1507, 1437, 1367, 1315, 1216, 1145, 1014, 850, 799, 684  $\text{cm}^{-1}$ .

**HRMS** (ESI)  $m/z$ : ( $[\text{M}]+\text{K}^+$ ) calcd for  $\text{C}_{22}\text{H}_{17}^{35}\text{Cl}^{35}\text{ClFO}_4\text{S}_2\text{K}^+$  = 536.9561, Found 536.9561.

**HRMS** (ESI)  $m/z$ : ( $[\text{M}]+\text{K}^+$ ) calcd for  $\text{C}_{22}\text{H}_{17}^{35}\text{Cl}^{37}\text{ClFO}_4\text{S}_2\text{K}^+$  = 538.9531, Found 538.9531.

**HRMS** (ESI)  $m/z$ : ( $[\text{M}]+\text{K}^+$ ) calcd for  $\text{C}_{22}\text{H}_{17}^{37}\text{Cl}^{37}\text{ClFO}_4\text{S}_2\text{K}^+$  = 540.9502, Found 540.9503.

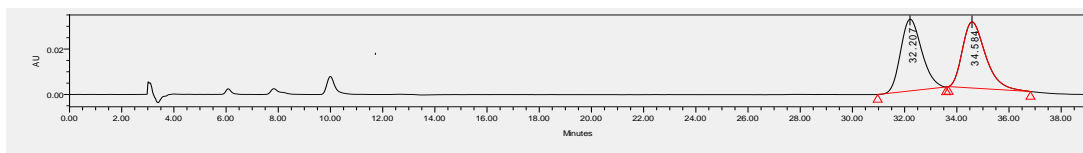

|   | Retention Time | Area    | % Area |
|---|----------------|---------|--------|
| 1 | 32.207         | 1775708 | 49.87  |
| 2 | 34.584         | 1784882 | 50.13  |

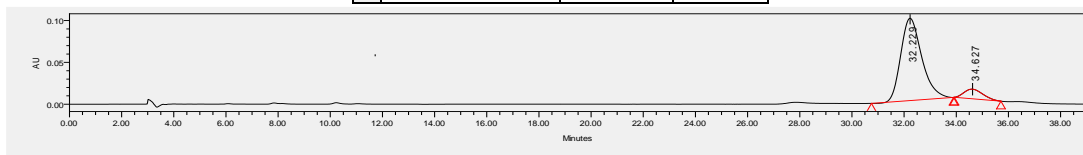

|   | Retention Time | Area    | % Area |
|---|----------------|---------|--------|
| 1 | 32.229         | 5508635 | 90.53  |
| 2 | 34.627         | 576343  | 9.47   |

**3,5-dichlorobenzyl (S)-2-(3-chlorophenyl)-2-(methylthio)-2-(phenylsulfonyl)acetate (C14)**

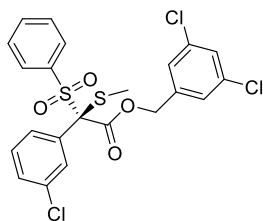

Colorless liquid. 71% yield, 90:10 er.  $[\alpha]_{D}^{26.9} = +31.9$  ( $c = 0.60$  in  $\text{CH}_2\text{Cl}_2$ ). Dissolved in hexane for HPLC; HPLC (Chiral IA column,  $i$ -PrOH/n-hexane = 20/80, flow rate: 1.0 mL/min, 254 nm),  $t_R(\text{major}) = 11.10$ ,  $t_R(\text{minor}) = 17.19$ .

$^1\text{H}$  NMR (400 MHz, Chloroform- $d$ )  $\delta = 7.59 - 7.53$  (m, 1H), 7.49 – 7.45 (m, 2H), 7.37 – 7.30 (m, 4H), 7.24 (d,  $J = 2.0$  Hz, 2H), 7.19 (t,  $J = 8.0$  Hz, 1H), 7.15 – 7.10 (m, 1H), 7.08 (t,  $J = 2.0$  Hz, 1H), 5.32 – 5.22 (m, 2H), 2.32 (s, 3H).

$^{13}\text{C}$  NMR (101 MHz, Chloroform- $d$ )  $\delta = 165.1, 137.6, 135.3, 134.8, 134.2, 134.0, 133.0, 131.3, 129.8, 129.7, 129.1, 128.8, 127.9, 127.8, 126.6, 82.0, 66.6, 15.3$ .

**IR** (neat): 2926, 1739, 1570, 1437, 1368, 1324, 1211, 1145, 1080, 855, 797, 686  $\text{cm}^{-1}$ .

**HRMS** (ESI)  $m/z$ : ( $[\text{M}]+\text{K}^+$ ) calcd for  $\text{C}_{22}\text{H}_{17}^{35}\text{Cl}^{35}\text{Cl}^{35}\text{ClO}_4\text{S}_2\text{K}^+ = 552.9265$ , Found 552.9266.

**HRMS** (ESI)  $m/z$ : ( $[\text{M}]+\text{K}^+$ ) calcd for  $\text{C}_{22}\text{H}_{17}^{35}\text{Cl}^{35}\text{Cl}^{37}\text{ClO}_4\text{S}_2\text{K}^+ = 554.9236$ , Found 554.9236.

**HRMS** (ESI)  $m/z$ : ( $[\text{M}]+\text{K}^+$ ) calcd for  $\text{C}_{22}\text{H}_{17}^{35}\text{Cl}^{37}\text{Cl}^{37}\text{ClO}_4\text{S}_2\text{K}^+ = 556.9206$ , Found 556.9204.

**HRMS** (ESI)  $m/z$ : ( $[\text{M}]+\text{K}^+$ ) calcd for  $\text{C}_{22}\text{H}_{17}^{37}\text{Cl}^{37}\text{Cl}^{37}\text{ClO}_4\text{S}_2\text{K}^+ = 558.9177$ , Found 558.9177.

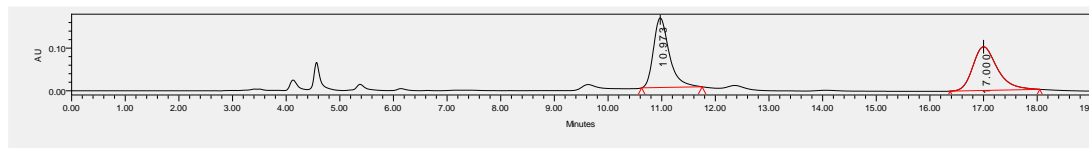

|   | Retention Time | Area    | % Area |
|---|----------------|---------|--------|
| 1 | 10.973         | 3319407 | 50.45  |
| 2 | 17.000         | 3259917 | 49.55  |

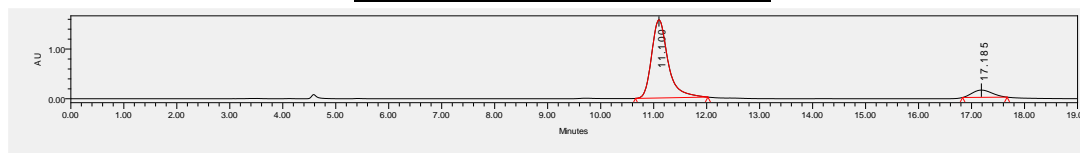

|   | Retention Time | Area     | % Area |
|---|----------------|----------|--------|
| 1 | 11.100         | 34003544 | 90.04  |
| 2 | 17.185         | 3762262  | 9.96   |

**3,5-dichlorobenzyl (S)-2-(4-chlorophenyl)-2-(methylthio)-2-(phenylsulfonyl)acetate (C15)**

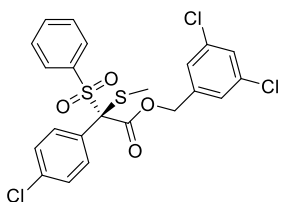

Colorless liquid. 83% yield, 91.5:8.5 er.  $[\alpha]_{D}^{27.8} = +37.3$  ( $c = 0.62$  in  $\text{CH}_2\text{Cl}_2$ ). Dissolved in hexane for HPLC; HPLC (Chiral IA column,  $i$ -PrOH/ $n$ -hexane = 10/90, flow rate: 1.0 mL/min, 254 nm),  $t_R(\text{major}) = 20.03$ ,  $t_R(\text{minor}) = 22.35$ .

$^1\text{H NMR}$  (400 MHz, Chloroform- $d$ )  $\delta = 7.58 - 7.51$  (m, 1H), 7.50 - 7.46 (m, 2H), 7.35 - 7.30 (m, 3H), 7.24 - 7.18 (m, 4H), 7.16 - 7.11 (m, 2H), 5.26 (s, 2H), 2.30 (s, 3H).

$^{13}\text{C NMR}$  (101 MHz, Chloroform- $d$ )  $\delta = 165.2$ , 137.7, 136.0, 135.2, 134.9, 134.0, 131.2, 130.9, 129.6, 128.7, 128.2, 127.9, 126.5, 81.9, 66.5, 15.3.

**IR** (neat): 3073, 1739, 1571, 1489, 1439, 1319, 1213, 1145, 1090, 1013, 851, 799, 715, 684  $\text{cm}^{-1}$ .

**HRMS** (ESI)  $m/z$ : ( $[\text{M}]+\text{K}^+$ ) calcd for  $\text{C}_{22}\text{H}_{17}^{35}\text{Cl}^{35}\text{Cl}^{35}\text{ClO}_4\text{S}_2\text{K}^+ = 552.9265$ , Found 552.9258.

**HRMS** (ESI)  $m/z$ : ( $[\text{M}]+\text{K}^+$ ) calcd for  $\text{C}_{22}\text{H}_{17}^{35}\text{Cl}^{35}\text{Cl}^{37}\text{ClO}_4\text{S}_2\text{K}^+ = 554.9236$ , Found 554.9229.

**HRMS** (ESI)  $m/z$ : ( $[\text{M}]+\text{K}^+$ ) calcd for  $\text{C}_{22}\text{H}_{17}^{35}\text{Cl}^{37}\text{Cl}^{37}\text{ClO}_4\text{S}_2\text{K}^+ = 556.9206$ , Found 556.9201.

**HRMS** (ESI)  $m/z$ : ( $[\text{M}]+\text{K}^+$ ) calcd for  $\text{C}_{22}\text{H}_{17}^{37}\text{Cl}^{37}\text{Cl}^{37}\text{ClO}_4\text{S}_2\text{K}^+ = 558.9177$ , Found 558.9179.

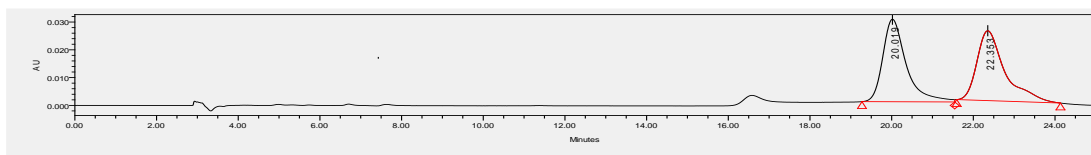

|   | Retention Time | Area    | % Area |
|---|----------------|---------|--------|
| 1 | 20.019         | 1184731 | 49.85  |
| 2 | 22.353         | 1191748 | 50.15  |

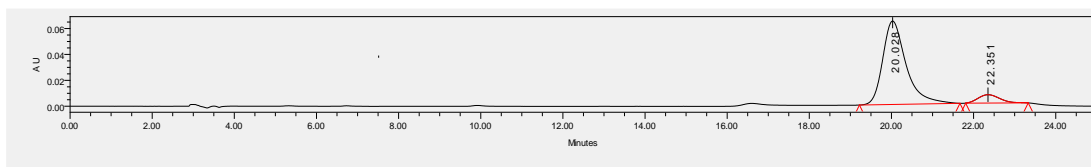

|   | Retention Time | Area    | % Area |
|---|----------------|---------|--------|
| 1 | 20.028         | 2546820 | 91.58  |
| 2 | 22.351         | 234252  | 8.42   |



**3,5-dichlorobenzyl (S)-2-(3,4-dichlorophenyl)-2-(methylthio)-2-(phenylsulfonyl)acetate (C16)**

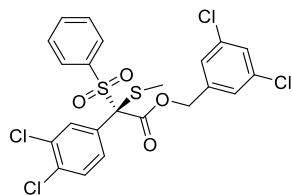

Yellow liquid. 68% yield, 88:12 er.  $[\alpha]^{28.0}_D = +27.9$  ( $c = 0.41$  in  $\text{CH}_2\text{Cl}_2$ ). Dissolved in hexane for HPLC; HPLC (Chiral IA column,  $i$ -PrOH/n-hexane = 10/90, flow rate: 1.0 mL/min, 254 nm),  $t_R(\text{major}) = 19.99$ ,  $t_R(\text{minor}) = 30.07$ .

$^1\text{H NMR}$  (400 MHz, Chloroform- $d$ )  $\delta = 7.59$  (t,  $J = 7.4$  Hz, 1H), 7.53 (d,  $J = 8.4$  Hz, 2H), 7.41 – 7.30 (m, 4H), 7.25 – 7.20 (m, 3H), 7.11 (dd,  $J = 8.4, 2.8$  Hz, 1H), 5.27 (s, 2H), 2.28 (s, 3H).

$^{13}\text{C NMR}$  (101 MHz, Chloroform- $d$ )  $\delta = 164.8, 137.5, 135.3, 134.7, 134.4, 134.3, 132.4, 131.6, 131.3, 131.1, 129.8, 129.0, 128.9, 128.0, 126.6, 81.4, 66.7, 15.3$ .

**IR** (neat): 2925, 1739, 1570, 1468, 1322, 1213, 1145, 1079, 1030, 854, 799, 684  $\text{cm}^{-1}$ .

**HRMS** (ESI)  $m/z$ : ( $[\text{M}]+\text{K}^+$ ) calcd for  $\text{C}_{22}\text{H}_{16}^{35}\text{Cl}^{35}\text{Cl}^{35}\text{Cl}^{35}\text{ClO}_4\text{S}_2\text{K}^+ = 586.8876$ , Found 586.8876,

**HRMS** (ESI)  $m/z$ : ( $[\text{M}]+\text{K}^+$ ) calcd for  $\text{C}_{22}\text{H}_{16}^{35}\text{Cl}^{35}\text{Cl}^{35}\text{Cl}^{37}\text{ClO}_4\text{S}_2\text{K}^+ = 588.8846$ , Found 588.8846.

**HRMS** (ESI)  $m/z$ : ( $[\text{M}]+\text{K}^+$ ) calcd for  $\text{C}_{22}\text{H}_{16}^{35}\text{Cl}^{35}\text{Cl}^{37}\text{Cl}^{37}\text{ClO}_4\text{S}_2\text{K}^+ = 590.8817$ , Found 590.8816.

**HRMS** (ESI)  $m/z$ : ( $[\text{M}]+\text{K}^+$ ) calcd for  $\text{C}_{22}\text{H}_{16}^{35}\text{Cl}^{37}\text{Cl}^{37}\text{Cl}^{37}\text{ClO}_4\text{S}_2\text{K}^+ = 592.8787$ , Found 592.8788.

**HRMS** (ESI)  $m/z$ : ( $[\text{M}]+\text{K}^+$ ) calcd for  $\text{C}_{22}\text{H}_{16}^{37}\text{Cl}^{37}\text{Cl}^{37}\text{Cl}^{37}\text{ClO}_4\text{S}_2\text{K}^+ = 594.8745$ , Found 594.8752.

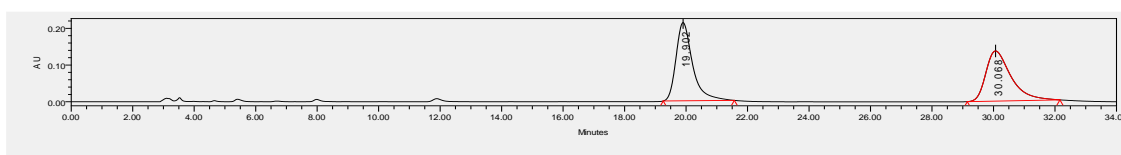

|   | Retention Time | Area    | % Area |
|---|----------------|---------|--------|
| 1 | 19.902         | 7989082 | 50.84  |
| 2 | 30.068         | 7726136 | 49.16  |

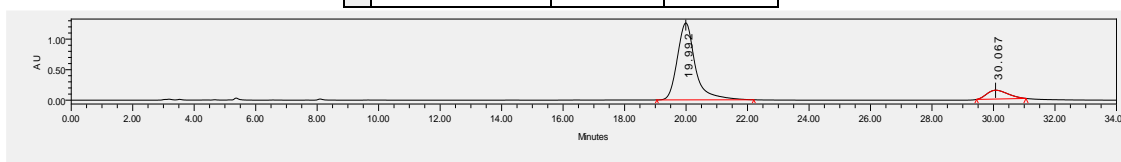

|   | Retention Time | Area     | % Area |
|---|----------------|----------|--------|
| 1 | 19.992         | 51010646 | 88.15  |
| 2 | 30.067         | 6854812  | 11.85  |

**3,5-dichlorobenzyl (S)-2-(3-bromophenyl)-2-(methylthio)-2-(phenylsulfonyl)acetate (C17)**

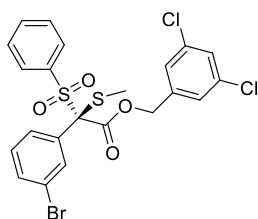

Colorless liquid. 72% yield, 90:10 er.  $[\alpha]_{D}^{27.8} = +23.2$  ( $c = 0.49$  in  $\text{CH}_2\text{Cl}_2$ ). Dissolved in hexane for HPLC; HPLC (Chiral IA column, *i*-PrOH/n-hexane = 20/80, flow rate: 1.0 mL/min, 254 nm),  $t_R(\text{major}) = 11.59$ ,  $t_R(\text{minor}) = 16.49$ .

**$^1\text{H NMR}$**  (400 MHz, Chloroform-*d*)  $\delta = 7.62 - 7.52$  (m, 1H), 7.50 - 7.46 (m, 3H), 7.37 - 7.30 (m, 3H), 7.24 (d,  $J = 2.0$  Hz, 2H), 7.23 - 7.15 (m, 2H), 7.17 - 7.08 (m, 1H), 5.32 - 5.21 (m, 2H), 2.32 (s, 3H).

**$^{13}\text{C NMR}$**  (101 MHz, Chloroform-*d*)  $\delta = 165.1, 137.6, 135.3, 134.8, 134.2, 133.3, 132.8, 132.5, 131.3, 129.4, 128.9, 128.4, 127.9, 126.7, 121.9, 81.9, 66.6, 15.3$ .

**IR** (neat): 2924, 1738, 1568, 1438, 1367, 1319, 1210, 1145, 1078, 994, 855, 796, 712  $\text{cm}^{-1}$ .

**HRMS** (ESI)  $m/z$ : ( $[\text{M}]+\text{K}^+$ ) calcd for  $\text{C}_{22}\text{H}_{17}^{79}\text{Br}^{35}\text{Cl}^{35}\text{ClO}_4\text{S}_2\text{K}^+ = 596.8760$ , Found 596.8757.

**HRMS** (ESI)  $m/z$ : ( $[\text{M}]+\text{K}^+$ ) calcd for  $\text{C}_{22}\text{H}_{17}^{79}\text{Br}^{37}\text{Cl}^{35}\text{ClO}_4\text{S}_2\text{K}^+ = 598.8740$ , Found 598.8734.

**HRMS** (ESI)  $m/z$ : ( $[\text{M}]+\text{K}^+$ ) calcd for  $\text{C}_{22}\text{H}_{17}^{81}\text{Br}^{37}\text{Cl}^{35}\text{ClO}_4\text{S}_2\text{K}^+ = 600.8710$ , Found 600.8706.

**HRMS** (ESI)  $m/z$ : ( $[\text{M}]+\text{K}^+$ ) calcd for  $\text{C}_{22}\text{H}_{17}^{81}\text{Br}^{37}\text{Cl}^{37}\text{ClO}_4\text{S}_2\text{K}^+ = 602.8681$ , Found 602.8682.

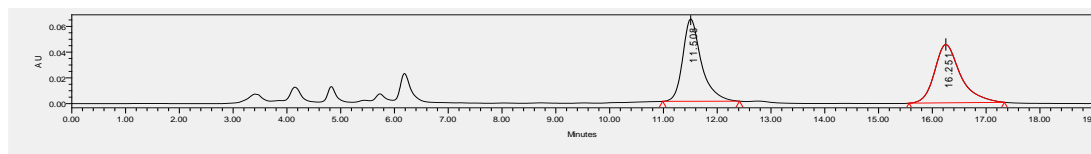

|   | Retention Time | Area    | % Area |
|---|----------------|---------|--------|
| 1 | 11.508         | 1536779 | 50.29  |
| 2 | 16.251         | 1519193 | 49.71  |

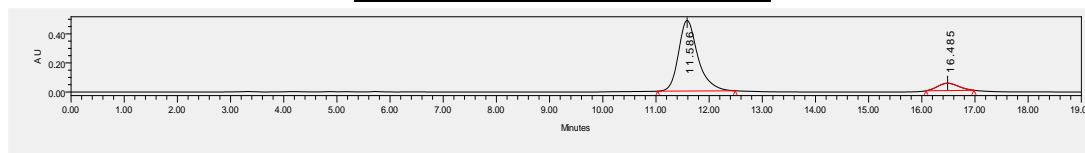

|   | Retention Time | Area     | % Area |
|---|----------------|----------|--------|
| 1 | 11.586         | 12309269 | 90.09  |
| 2 | 16.485         | 1354608  | 9.91   |

**3,5-dichlorobenzyl (S)-2-(4-bromophenyl)-2-(methylthio)-2-(phenylsulfonyl)acetate (C18)**

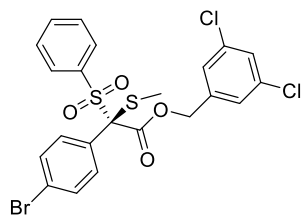

Colorless liquid. 89% yield, 90:10 er.  $[\alpha]^{24.0}_D = +41.0$  ( $c = 0.83$  in  $\text{CH}_2\text{Cl}_2$ ). Dissolved in hexane for HPLC; HPLC (Chiral IA column,  $i\text{-PrOH/n-hexane} = 10/90$ , flow rate: 1.0 mL/min, 254 nm),  $t_R(\text{major}) = 21.13$ ,  $t_R(\text{minor}) = 24.83$ .

**$^1\text{H NMR}$**  (400 MHz, Chloroform- $d$ )  $\delta = 7.59 - 7.53$  (m, 1H), 7.52 – 7.46 (m, 2H), 7.41 – 7.31 (m, 5H), 7.23 (d,  $J = 2.0$  Hz, 2H), 7.09 – 7.05 (m, 2H), 5.26 (s, 2H), 2.30 (s, 3H).

**$^{13}\text{C NMR}$**  (101 MHz, Chloroform- $d$ )  $\delta = 165.19$ , 137.66, 135.29, 134.97, 134.10, 131.30, 131.18, 130.17, 128.85, 127.91, 126.55, 124.34, 82.03, 66.52, 15.28.

**IR** (neat): 3073, 1740, 1572, 1486, 1439, 1322, 1275, 1146, 1078, 1009, 851, 799, 756  $\text{cm}^{-1}$ .

**HRMS** (ESI)  $m/z$ : ( $[\text{M}]+\text{K}^+$ ) calcd for  $\text{C}_{22}\text{H}_{17}^{79}\text{Br}^{35}\text{Cl}^{35}\text{ClO}_4\text{S}_2\text{K}^+$  = 596.8760, Found 596.8761.

**HRMS** (ESI)  $m/z$ : ( $[\text{M}]+\text{K}^+$ ) calcd for  $\text{C}_{22}\text{H}_{17}^{79}\text{Br}^{37}\text{Cl}^{35}\text{ClO}_4\text{S}_2\text{K}^+$  = 598.8740, Found 598.8740.

**HRMS** (ESI)  $m/z$ : ( $[\text{M}]+\text{K}^+$ ) calcd for  $\text{C}_{22}\text{H}_{17}^{81}\text{Br}^{37}\text{Cl}^{35}\text{ClO}_4\text{S}_2\text{K}^+$  = 600.8710, Found 600.8711.

**HRMS** (ESI)  $m/z$ : ( $[\text{M}]+\text{K}^+$ ) calcd for  $\text{C}_{22}\text{H}_{17}^{81}\text{Br}^{37}\text{Cl}^{37}\text{ClO}_4\text{S}_2\text{K}^+$  = 602.8681, Found 602.8683.

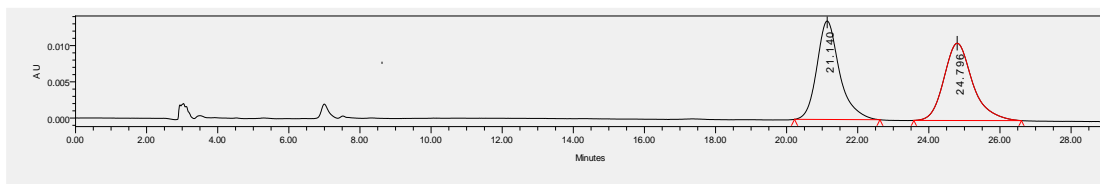

|   | Retention Time | Area   | % Area |
|---|----------------|--------|--------|
| 1 | 21.140         | 601532 | 50.18  |
| 2 | 24.796         | 597144 | 49.82  |

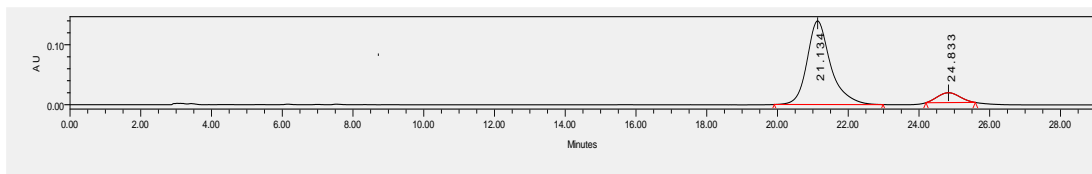

|   | Retention Time | Area    | % Area |
|---|----------------|---------|--------|
| 1 | 21.134         | 6457406 | 90.01  |
| 2 | 24.833         | 716607  | 9.99   |

**3,5-dichlorobenzyl (S)-2-(methylthio)-2-(naphthalen-2-yl)-2-(phenylsulfonyl)acetate (C19)**

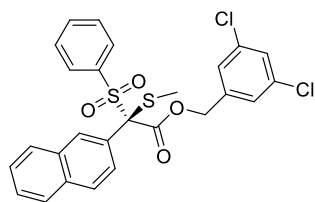

Yellow liquid. 78% yield, 80:20 er.  $[\alpha]_{D}^{27.4} = +27.9$  ( $c = 0.54$  in  $\text{CH}_2\text{Cl}_2$ ). Dissolved in hexane for HPLC; HPLC (Chiral IB column, *i*-PrOH/n-hexane = 10/90, flow rate: 1.0 mL/min, 254 nm),  $t_R(\text{major}) = 24.42$ ,  $t_R(\text{minor}) = 19.31$ .

$^1\text{H NMR}$  (400 MHz, Chloroform-*d*)  $\delta = 7.74$  (d,  $J = 8.0$  Hz, 1H), 7.64 (d,  $J = 8.4$  Hz, 1H), 7.53 (d,  $J = 8.0$  Hz, 1H), 7.50 – 7.43 (m, 2H), 7.44 – 7.34 (m, 2H), 7.33 (d,  $J = 7.2$  Hz, 2H), 7.26 – 7.21 (m, 2H), 7.15 (d,  $J = 2.0$  Hz, 2H), 7.11 (t,  $J = 8.0$  Hz, 2H), 5.26 – 5.16 (m, 2H), 2.31 (s, 3H).

$^{13}\text{C NMR}$  (101 MHz, Chloroform-*d*)  $\delta = 165.6$ , 137.8, 135.2, 135.0, 133.8, 133.2, 132.1, 131.3, 129.8, 128.8, 128.5, 128.4, 127.6, 127.6, 127.5, 127.4, 126.6, 126.1, 82.8, 66.4, 15.4.

**IR** (neat): 3061, 1737, 1570, 1436, 1365, 1313, 1206, 1143, 1078, 855, 798, 733  $\text{cm}^{-1}$ .

**HRMS** (ESI)  $m/z$ : ( $[\text{M}]+\text{K}^+$ ) calcd for  $\text{C}_{26}\text{H}_{20}^{35}\text{Cl}^{35}\text{ClO}_4\text{S}_2\text{K}^+ = 568.9812$ , Found 568.9808.

**HRMS** (ESI)  $m/z$ : ( $[\text{M}]+\text{K}^+$ ) calcd for  $\text{C}_{26}\text{H}_{20}^{35}\text{Cl}^{37}\text{ClO}_4\text{S}_2\text{K}^+ = 570.9782$ , Found 570.9781.

**HRMS** (ESI)  $m/z$ : ( $[\text{M}]+\text{K}^+$ ) calcd for  $\text{C}_{26}\text{H}_{20}^{37}\text{Cl}^{37}\text{ClO}_4\text{S}_2\text{K}^+ = 572.9753$ , Found 572.9753.

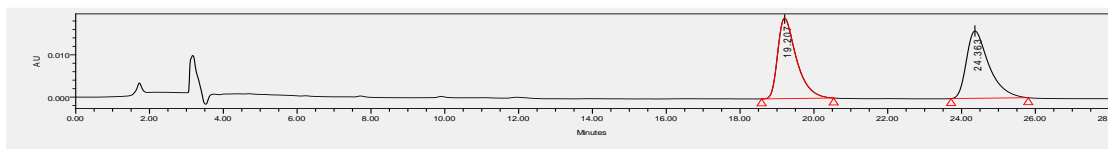

|   | Retention Time | Area   | % Area |
|---|----------------|--------|--------|
| 1 | 19.207         | 668456 | 49.91  |
| 2 | 24.363         | 670890 | 50.09  |

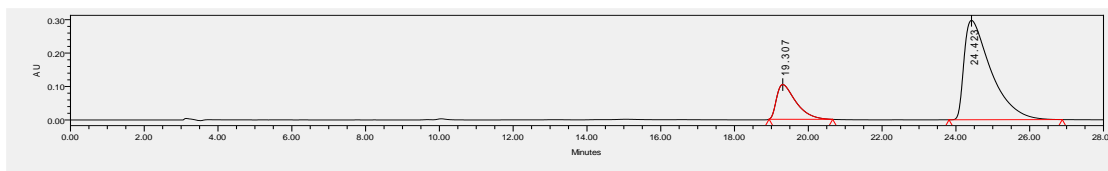

|   | Retention Time | Area     | % Area |
|---|----------------|----------|--------|
| 1 | 19.307         | 3766840  | 20.00  |
| 2 | 24.423         | 15067412 | 80.00  |

**benzhydryl (S)-2-(methylthio)-2-phenyl-2-(phenylsulfonyl)acetate (C20)**

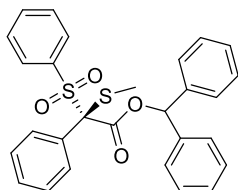

Colorless liquid. 81% yield, 95.5:4.5 er.  $[\alpha]^{19.7}_D = +39.0$  ( $c = 1.36$  in  $\text{CH}_2\text{Cl}_2$ ). Dissolved in hexane for HPLC; HPLC (Chiral IA column,  $i\text{-PrOH}/n\text{-hexane} = 10/90$ , flow rate: 1.0 mL/min, 254 nm),  $t_R(\text{major}) = 17.29$  min,  $t_R(\text{minor}) = 19.17$  min.

$^1\text{H NMR}$  (600 MHz, Chloroform- $d$ )  $\delta = 7.49 - 7.44$  (m, 1H), 7.41 - 7.38 (m, 4H), 7.34 - 7.28 (m, 4H), 7.27 - 7.21 (m, 7H), 7.16 - 7.09 (m, 5H), 2.17 (s, 3H).

$^{13}\text{C NMR}$  (151 MHz, Chloroform- $d$ )  $\delta = 164.9, 139.1, 138.8, 135.3, 133.6, 131.5, 131.3, 129.6, 129.4, 128.5, 128.4, 128.3, 128.1, 127.7, 127.6, 127.3, 127.2, 82.7, 79.3, 14.9$ .

**IR** (neat): 3062, 1732, 1586, 1494, 1447, 1312, 1219, 1144, 1078, 951, 693  $\text{cm}^{-1}$ .

**HRMS** (ESI)  $m/z$ : ( $[\text{M}]+\text{K}^+$ ) calcd for  $\text{C}_{28}\text{H}_{24}\text{O}_4\text{S}_2\text{K}^+ = 527.0748$ , Found 527.0749.

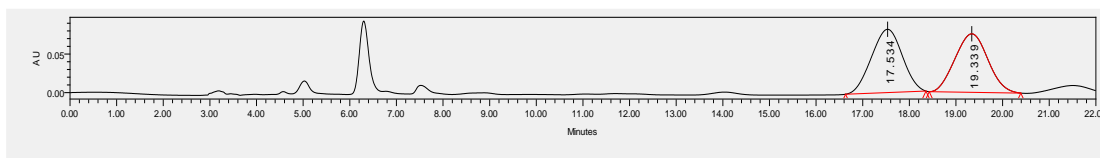

|   | Retention Time | Area    | % Area |
|---|----------------|---------|--------|
| 1 | 17.534         | 3774435 | 50.39  |
| 2 | 19.339         | 3715414 | 49.61  |

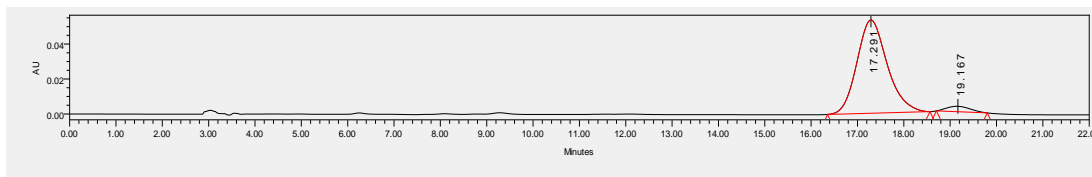

|   | Retention Time | Area    | % Area |
|---|----------------|---------|--------|
| 1 | 17.291         | 2419866 | 95.65  |
| 2 | 19.167         | 110179  | 4.35   |

**benzhydryl (S)-2-(3-fluorophenyl)-2-(methylthio)-2-(phenylsulfonyl)acetate (C21)**

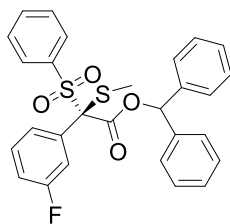

Colorless liquid. 80% yield, 95.5:4.5 er.  $[\alpha]_D^{23.4} = +37.3$  ( $c = 0.54$  in  $\text{CH}_2\text{Cl}_2$ ). Dissolved in hexane for HPLC; HPLC (Chiral IA column,  $i\text{-PrOH}/n\text{-hexane} = 10/90$ , flow rate: 1.0 mL/min, 254 nm),  $t_R(\text{major}) = 15.29$  min,  $t_R(\text{minor}) = 17.71$  min.

**$^1\text{H NMR}$**  (400 MHz, Chloroform- $d$ )  $\delta = 7.51$  (t,  $J = 7.6$  Hz, 1H), 7.45 (d,  $J = 8.0$  Hz, 2H), 7.39 (d,  $J = 6.8$  Hz, 2H), 7.38 – 7.28 (m, 3H), 7.32 – 7.22 (m, 7H), 7.17 – 7.06 (m, 2H), 7.02 (td,  $J = 8.0, 2.0$  Hz, 1H), 6.93 (d,  $J = 8.0$  Hz, 1H), 6.86 (d,  $J = 10.0$  Hz, 1H), 2.16 (s, 3H).

**$^{13}\text{C NMR}$**  (101 MHz, Chloroform- $d$ )  $\delta = 164.4, 161.7$  (d,  $J = 248.1$  Hz), 138.9, 138.6, 135.1, 133.9, 133.7 (d,  $J = 7.7$  Hz), 131.3, 129.2 (d,  $J = 8.1$  Hz), 128.6, 128.4, 128.3, 128.2, 127.7, 127.2, 125.5 (d,  $J = 3.1$  Hz), 117.0 (d,  $J = 24.4$  Hz), 116.5 (d,  $J = 21.0$  Hz), 82.1, 79.6, 15.0.

**$^{19}\text{F NMR}$**  (376 MHz, Chloroform- $d$ )  $\delta = -112.09$ .

**IR** (neat): 3065, 1735, 1587, 1489, 1446, 1319, 1222, 1147, 1080, 952, 695  $\text{cm}^{-1}$ .

**HRMS** (ESI)  $m/z$ : ( $[\text{M}] + \text{Na}^+$ ) calcd for  $\text{C}_{28}\text{H}_{23}\text{FO}_4\text{S}_2\text{Na}^+ = 529.0914$ , Found 529.0914.

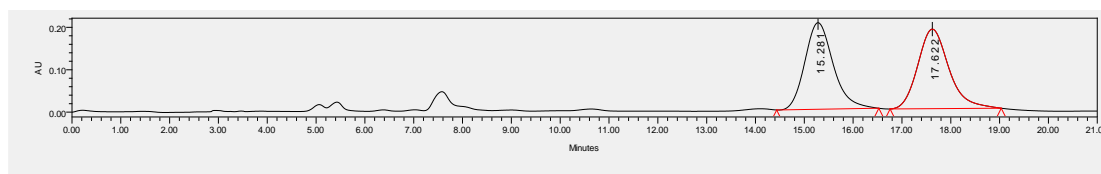

|   | Retention Time | Area    | % Area |
|---|----------------|---------|--------|
| 1 | 15.281         | 8259858 | 49.86  |
| 2 | 17.622         | 8305014 | 50.14  |

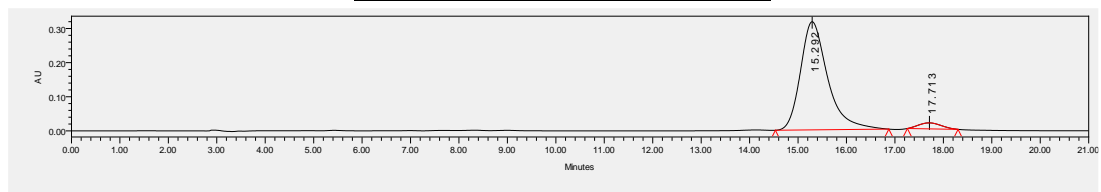

|   | Retention Time | Area     | % Area |
|---|----------------|----------|--------|
| 1 | 15.292         | 12369727 | 95.57  |
| 2 | 17.713         | 573945   | 4.43   |

**benzhydryl (S)-2-(4-fluorophenyl)-2-(methylthio)-2-(phenylsulfonyl)acetate (C22)**

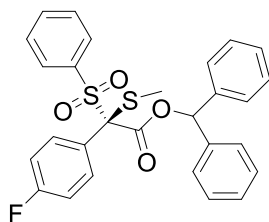

Colorless liquid. 70% yield, 94:6 er.  $[\alpha]^{24.6}_D = +31.5$  ( $c = 0.27$  in  $\text{CH}_2\text{Cl}_2$ ). Dissolved in hexane for HPLC; HPLC (Chiral IA column,  $i$ -PrOH/n-hexane = 10/90, flow rate: 1.0 mL/min, 254 nm),  $t_R(\text{major}) = 13.54$  min,  $t_R(\text{minor}) = 15.16$  min.

$^1\text{H NMR}$  (400 MHz, Chloroform- $d$ )  $\delta = 7.50$  (t,  $J = 7.4$  Hz, 1H), 7.46 – 7.37 (m, 4H), 7.36 – 7.30 (m, 3H), 7.30 – 7.24 (m, 7H), 7.14 – 7.06 (m, 3H), 6.84 (t,  $J = 8.4$  Hz, 2H), 2.16 (s, 3H).

$^{13}\text{C NMR}$  (101 MHz, Chloroform- $d$ )  $\delta = 164.72$ , 163.1 (d,  $J = 252.0$  Hz), 138.9, 138.7, 135.2, 133.8, 131.7 (d,  $J = 8.6$  Hz), 131.3, 128.6, 128.4, 128.3, 128.2, 127.7, 127.4 (d,  $J = 3.5$  Hz), 127.2, 114.8 (d,  $J = 21.9$  Hz), 81.9, 79.4, 15.1.

$^{19}\text{F NMR}$  (376 MHz, Chloroform- $d$ )  $\delta = -110.72$ .

**IR** (neat): 2924, 1735, 1601, 1505, 1451, 1316, 1228, 1185, 1146, 1079, 644  $\text{cm}^{-1}$ .

**HRMS** (ESI)  $m/z$ :  $([\text{M}] + \text{Na}^+)$  calcd for  $\text{C}_{28}\text{H}_{23}\text{FO}_4\text{S}_2\text{Na}^+ = 529.0914$ , Found 529.0914.

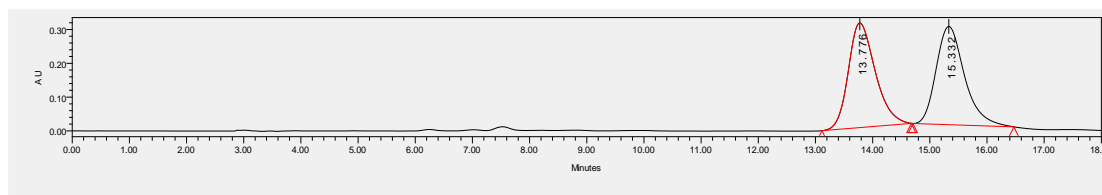

|   | Retention Time | Area     | % Area |
|---|----------------|----------|--------|
| 1 | 13.776         | 10105443 | 50.24  |
| 2 | 15.332         | 10007048 | 49.76  |

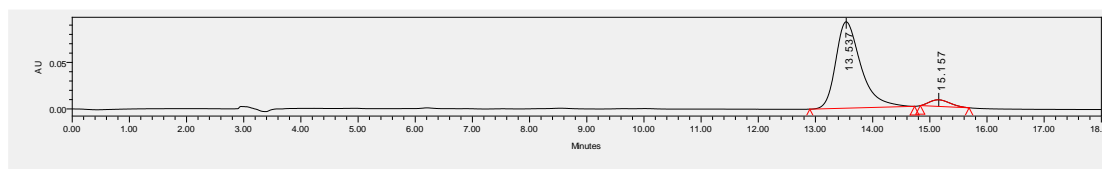

|   | Retention Time | Area    | % Area |
|---|----------------|---------|--------|
| 1 | 13.537         | 2825105 | 94.10  |
| 2 | 15.157         | 177273  | 5.90   |

**benzhydryl (S)-2-(3-chlorophenyl)-2-(methylthio)-2-(phenylsulfonyl)acetate (C23)**

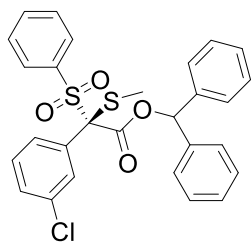

Colorless liquid. 74% yield, 95.5:4.5 er.  $[\alpha]^{24.5}_D = +33.7$  ( $c = 0.50$  in  $\text{CH}_2\text{Cl}_2$ ). Dissolved in hexane for HPLC; HPLC (Chiral IA column,  $i$ -PrOH/ $n$ -hexane = 10/90, flow rate: 1.0 mL/min, 254 nm),  $t_R(\text{major}) = 13.84$  min,  $t_R(\text{minor}) = 17.08$  min.

**$^1\text{H NMR}$**  (400 MHz, Chloroform- $d$ )  $\delta = 7.52$  (t,  $J = 7.4$  Hz, 1H), 7.45 (d,  $J = 8.0$  Hz, 2H), 7.38 (d,  $J = 7.6$  Hz, 2H), 7.36 – 7.30 (m, 4H), 7.30 – 7.24 (m, 7H), 7.15 – 7.01 (m, 4H), 2.15 (s, 3H).

**$^{13}\text{C NMR}$**  (101 MHz, Chloroform- $d$ )  $\delta = 164.4, 138.9, 138.6, 134.9, 133.9, 133.7, 133.4, 131.3, 129.8, 129.6, 128.9, 128.6, 128.5, 128.3, 128.3, 127.9, 127.7, 127.2, 127.2, 82.0, 79.6, 15.0$ .

**IR** (neat): 2924, 1735, 1577, 1450, 1321, 1223, 1185, 1147, 1080, 752, 695  $\text{cm}^{-1}$ .

**HRMS** (ESI)  $m/z$ : ( $[\text{M}]+\text{Na}^+$ ) calcd for  $\text{C}_{28}\text{H}_{23}^{35}\text{ClO}_4\text{S}_2\text{Na}^+$  = 545.0618, Found 545.0618.

**HRMS** (ESI)  $m/z$ : ( $[\text{M}]+\text{Na}^+$ ) calcd for  $\text{C}_{28}\text{H}_{23}^{37}\text{ClO}_4\text{S}_2\text{Na}^+$  = 547.0589, Found 547.0590.

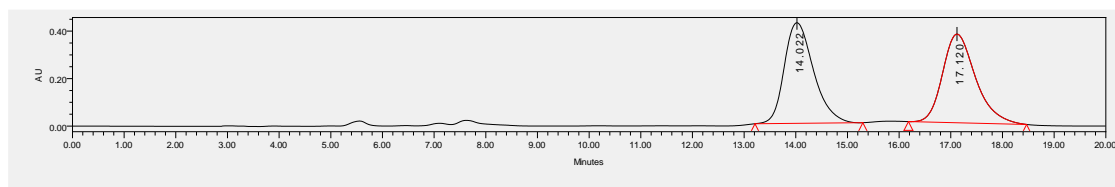

|   | Retention Time | Area     | % Area |
|---|----------------|----------|--------|
| 1 | 14.022         | 16675619 | 50.14  |
| 2 | 17.120         | 16585782 | 49.86  |

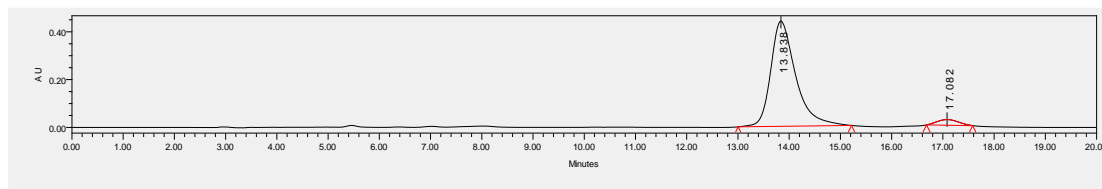

|   | Retention Time | Area     | % Area |
|---|----------------|----------|--------|
| 1 | 13.838         | 14868387 | 95.59  |
| 2 | 17.082         | 685372   | 4.41   |



**benzhydryl (S)-2-(4-chlorophenyl)-2-(methylthio)-2-(phenylsulfonyl)acetate (C24)**

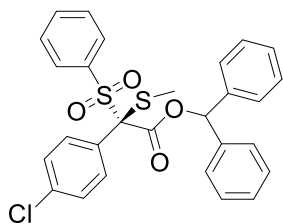

Colorless liquid. 74% yield, 94:6 er.  $[\alpha]^{25.5}_D = +40.2$  ( $c = 0.64$  in  $\text{CH}_2\text{Cl}_2$ ). Dissolved in hexane for HPLC; HPLC (Chiral IA column,  $i\text{-PrOH/n-hexane} = 10/90$ , flow rate: 1.0 mL/min, 254 nm),  $t_R(\text{major}) = 14.02$  min,  $t_R(\text{minor}) = 16.34$  min.

**$^1\text{H NMR}$**  (400 MHz, Chloroform- $d$ )  $\delta = 7.51$  (t,  $J = 7.6$  Hz, 1H), 7.45 (d,  $J = 8.0$  Hz, 2H), 7.38 (d,  $J = 7.2$  Hz, 2H), 7.36 – 7.24 (m, 10H), 7.13 (d,  $J = 8.8$  Hz, 2H), 7.10 – 7.02 (m, 3H), 2.15 (s, 3H).

**$^{13}\text{C NMR}$**  (101 MHz, Chloroform- $d$ )  $\delta = 164.6, 138.9, 138.6, 135.7, 135.1, 133.9, 131.3, 131.0, 130.1, 128.6, 128.5, 128.3, 128.3, 127.9, 127.8, 127.3, 127.2, 82.0, 79.5, 15.0$ .

**IR** (neat): 2923, 1735, 1589, 1491, 1451, 1319, 1223, 1184, 1146, 1086, 697  $\text{cm}^{-1}$ .

**HRMS** (ESI)  $m/z$ : ( $[\text{M}]+\text{Na}^+$ ) calcd for  $\text{C}_{28}\text{H}_{23}^{35}\text{ClO}_4\text{S}_2\text{Na}^+$  = 545.0618, Found 545.0618.

**HRMS** (ESI)  $m/z$ : ( $[\text{M}]+\text{Na}^+$ ) calcd for  $\text{C}_{28}\text{H}_{23}^{37}\text{ClO}_4\text{S}_2\text{Na}^+$  = 547.0589, Found 547.0589.

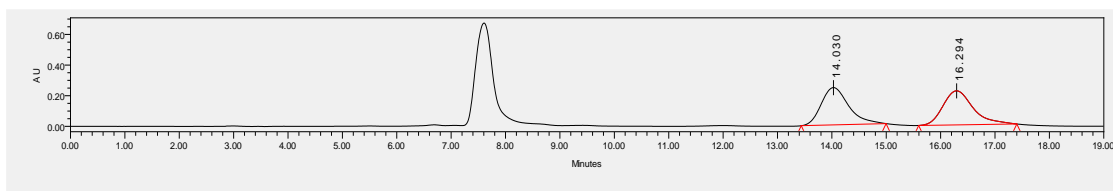

|   | Retention Time | Area    | % Area |
|---|----------------|---------|--------|
| 1 | 14.030         | 8543348 | 49.94  |
| 2 | 16.294         | 8562419 | 50.06  |

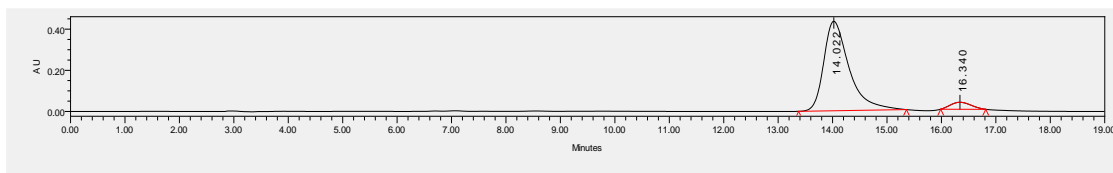

|   | Retention Time | Area     | % Area |
|---|----------------|----------|--------|
| 1 | 14.022         | 14099889 | 94.06  |
| 2 | 16.340         | 889871   | 5.94   |

**benzhydryl (S)-2-(3-bromophenyl)-2-(methylthio)-2-(phenylsulfonyl)acetate (C25)**

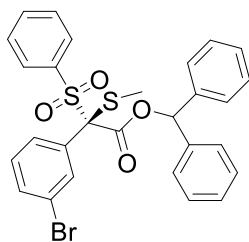

Colorless liquid. 90% yield, 95.5:4.5 er.  $[\alpha]^{24.6}_D = +26.9$  ( $c = 0.69$  in  $\text{CH}_2\text{Cl}_2$ ). Dissolved in hexane for HPLC; HPLC (Chiral IA column,  $i\text{-PrOH}/n\text{-hexane} = 10/90$ , flow rate: 1.0 mL/min, 254 nm),  $t_R(\text{major}) = 14.44$  min,  $t_R(\text{minor}) = 17.78$  min.

**$^1\text{H NMR}$**  (400 MHz, Chloroform- $d$ )  $\delta = 7.52$  (t,  $J = 7.4$  Hz, 1H), 7.45 (d,  $J = 8.0$  Hz, 3H), 7.42 – 7.34 (m, 2H), 7.38 – 7.25 (m, 8H), 7.26 – 7.23 (m, 2H), 7.18 (s, 1H), 7.15 – 7.08 (m, 2H), 7.04 (t,  $J = 7.8$  Hz, 1H), 2.15 (s, 3H).

**$^{13}\text{C NMR}$**  (101 MHz, Chloroform- $d$ )  $\delta = 164.3, 138.9, 138.6, 134.8, 133.9, 133.6, 132.5, 131.3, 129.8, 129.2, 128.6, 128.5, 128.4, 128.3, 128.2, 127.7, 127.2, 127.2, 121.6, 81.9, 79.5, 15.0$ .

**IR** (neat): 2924, 1735, 1566, 1450, 1323, 1222, 1183, 1147, 1079, 951, 694  $\text{cm}^{-1}$ .

**HRMS** (ESI)  $m/z$ :  $([\text{M}]+\text{Na}^+)$  calcd for  $\text{C}_{28}\text{H}_{23}^{79}\text{BrO}_4\text{S}_2\text{Na}^+ = 589.0113$ , Found 589.0114.

**HRMS** (ESI)  $m/z$ :  $([\text{M}]+\text{Na}^+)$  calcd for  $\text{C}_{28}\text{H}_{23}^{81}\text{BrO}_4\text{S}_2\text{Na}^+ = 591.0093$ , Found 591.0093.

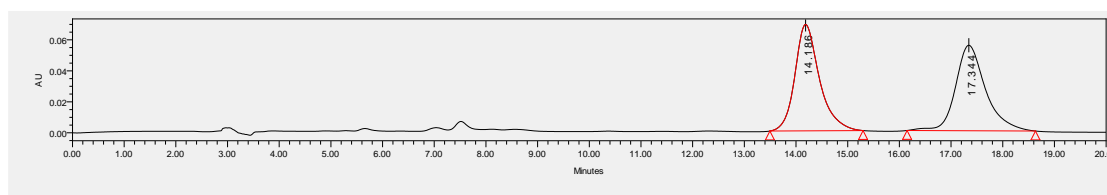

|   | Retention Time | Area    | % Area |
|---|----------------|---------|--------|
| 1 | 14.186         | 2261449 | 50.45  |
| 2 | 17.344         | 2221546 | 49.55  |

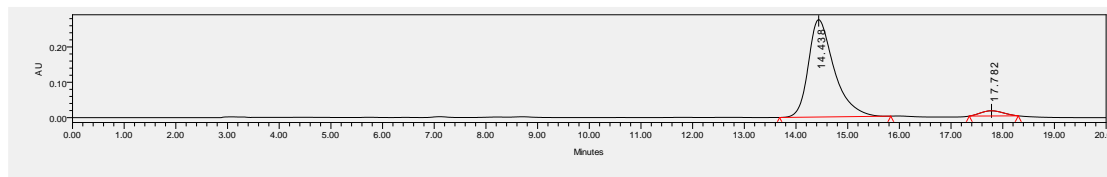

|   | Retention Time | Area    | % Area |
|---|----------------|---------|--------|
| 1 | 14.438         | 9521520 | 95.54  |
| 2 | 17.782         | 444658  | 4.46   |

**benzhydryl (S)-2-(4-bromophenyl)-2-(methylthio)-2-(phenylsulfonyl)acetate (C26)**

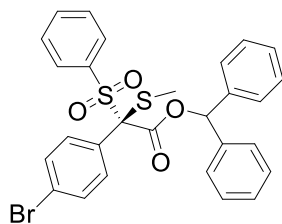

Colorless liquid. 75% yield, 94:6 er.  $[\alpha]^{23.6}_D = +54.3$  ( $c = 0.23$  in  $\text{CH}_2\text{Cl}_2$ ). Dissolved in hexane for HPLC; HPLC (Chiral IA column,  $i\text{-PrOH}/n\text{-hexane} = 10/90$ , flow rate: 1.0 mL/min, 254 nm),  $t_R(\text{major}) = 14.61$  min,  $t_R(\text{minor}) = 17.07$  min.

$^1\text{H NMR}$  (400 MHz, Chloroform- $d$ )  $\delta = 7.51$  (t,  $J = 7.6$  Hz, 1H), 7.46 (d,  $J = 8.0$  Hz, 2H), 7.38 (d,  $J = 6.8$  Hz, 2H), 7.38 – 7.22 (m, 12H), 7.07 (s, 1H), 6.99 (d,  $J = 8.4$  Hz, 2H), 2.14 (s, 3H).

$^{13}\text{C NMR}$  (101 MHz, Chloroform- $d$ )  $\delta = 164.5, 138.9, 138.6, 135.1, 133.9, 131.3, 131.3, 130.9, 130.6, 128.6, 128.5, 128.3, 128.3, 127.8, 127.3, 127.2, 124.0, 82.1, 79.5, 15.0$ .

**IR** (neat): 2926, 1735, 1585, 1489, 1448, 1319, 1224, 1184, 1146, 1078, 697  $\text{cm}^{-1}$ .

**HRMS** (ESI)  $m/z$ : ( $[\text{M}]+\text{Na}^+$ ) calcd for  $\text{C}_{28}\text{H}_{23}^{79}\text{BrO}_4\text{S}_2\text{Na}^+ = 589.0113$ , Found 589.0113.

**HRMS** (ESI)  $m/z$ : ( $[\text{M}]+\text{Na}^+$ ) calcd for  $\text{C}_{28}\text{H}_{23}^{81}\text{BrO}_4\text{S}_2\text{Na}^+ = 591.0093$ , Found 591.0093.

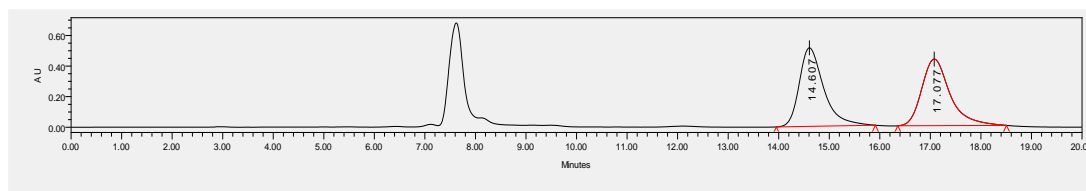

|   | Retention Time | Area     | % Area |
|---|----------------|----------|--------|
| 1 | 14.607         | 17236677 | 50.48  |
| 2 | 17.077         | 16911239 | 49.52  |

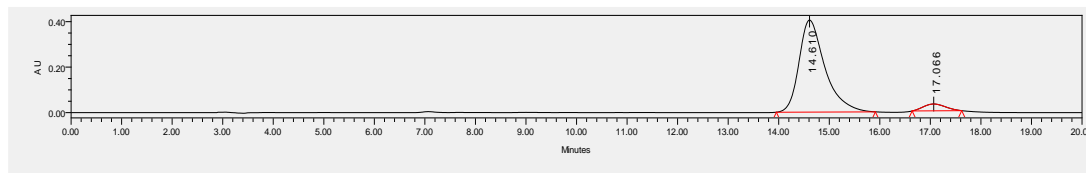

|   | Retention Time | Area     | % Area |
|---|----------------|----------|--------|
| 1 | 14.610         | 14386376 | 94.03  |
| 2 | 17.066         | 913457   | 5.97   |

**benzhydryl (S)-2-(4-iodophenyl)-2-(methylthio)-2-(phenylsulfonyl)acetate (C27)**

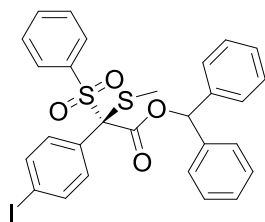

Colorless liquid. 83% yield, 91:9 er.  $[\alpha]^{22.5}_D = +52.5$  ( $c = 0.55$  in  $\text{CH}_2\text{Cl}_2$ ). Dissolved in hexane for HPLC; HPLC (Chiral IA column,  $i$ -PrOH/n-hexane = 10/90, flow rate: 1.0 mL/min, 254 nm),  $t_R(\text{major}) = 15.74$  min,  $t_R(\text{minor}) = 17.87$  min.

$^1\text{H NMR}$  (600 MHz, Chloroform- $d$ )  $\delta = 7.53 - 7.47$  (m, 3H), 7.45 (d,  $J = 7.8$  Hz, 2H), 7.37 (d,  $J = 6.6$  Hz, 2H), 7.33 (t,  $J = 7.5$  Hz, 2H), 7.32 - 7.23 (m, 8H), 7.07 (s, 1H), 6.85 (d,  $J = 8.4$  Hz, 2H), 2.13 (s, 3H).

$^{13}\text{C NMR}$  (151 MHz,  $\text{CDCl}_3$ )  $\delta = 164.5, 138.9, 138.6, 136.8, 135.0, 133.9, 131.3, 128.6, 128.4, 128.3, 128.3, 127.8, 127.2, 127.2, 95.9, 82.3, 79.5, 14.9$ .

**IR** (neat): 3062, 1734, 1583, 1487, 1448, 1319, 1223, 1146, 1077, 1004, 697  $\text{cm}^{-1}$ .

**HRMS** (ESI)  $m/z$ : ( $[\text{M}] + \text{Na}^+$ ) calcd for  $\text{C}_{28}\text{H}_{23}\text{IO}_4\text{S}_2\text{Na}^+$  = 636.9975, Found 636.9974.

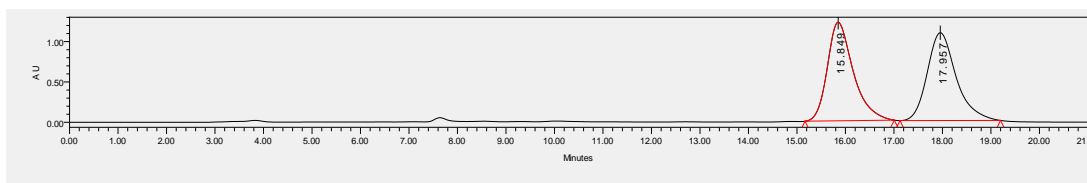

|   | Retention Time | Area     | % Area |
|---|----------------|----------|--------|
| 1 | 15.849         | 45310665 | 50.18  |
| 2 | 17.957         | 44979041 | 49.82  |

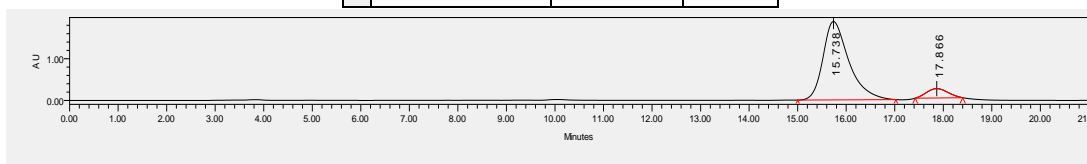

|   | Retention Time | Area     | % Area |
|---|----------------|----------|--------|
| 1 | 15.738         | 69627494 | 91.04  |
| 2 | 17.866         | 6855687  | 8.96   |

**benzhydryl (S)-2-(methylthio)-2-(phenylsulfonyl)-2-(3-(trifluoromethyl)phenyl)acetate (C28)**

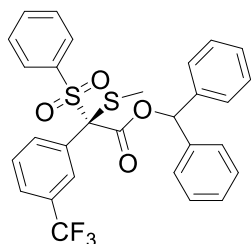

Colorless liquid. 65% yield, 96:4 er.  $[\alpha]^{22}_D = +30.0$  ( $c = 0.57$  in  $\text{CH}_2\text{Cl}_2$ ). Dissolved in hexane for HPLC; HPLC (Chiral IA column,  $i$ -PrOH/n-hexane = 10/90, flow rate: 1.0 mL/min, 254 nm),  $t_R(\text{major}) = 10.78$  min,  $t_R(\text{minor}) = 12.42$  min.

**$^1\text{H NMR}$**  (600 MHz, Chloroform- $d$ )  $\delta = 7.50$  (d,  $J = 7.8$  Hz, 1H), 7.44 (t,  $J = 7.5$  Hz, 1H), 7.39 (d,  $J = 8.0$  Hz, 1H), 7.32 (d,  $J = 7.7$  Hz, 4H), 7.27 (t,  $J = 7.6$  Hz, 3H), 7.26 – 7.16 (m, 8H), 7.14 (s, 1H), 7.03 (s, 1H), 2.07 (s, 3H).

**$^{13}\text{C NMR}$**  (151 MHz, Chloroform- $d$ )  $\delta = 164.4, 138.9, 138.6, 134.7, 134.1, 133.5, 132.8, 131.2, 130.2$  (d,  $J = 32.7$  Hz), 128.6, 128.5, 128.4 (d,  $J = 2.1$  Hz), 128.3, 127.9, 127.3, 127.2, 126.5 (q,  $J = 3.9$  Hz), 126.2 (q,  $J = 3.5$  Hz), 82.0, 79.8, 14.9.

**$^{19}\text{F NMR}$**  (565 MHz,  $\text{CDCl}_3$ )  $\delta = -62.77$ .

**IR** (neat): 2925, 1736, 1495, 1447, 1328, 1222, 1169, 1147, 1079, 1012, 697  $\text{cm}^{-1}$ .

**HRMS** (ESI)  $m/z$ : ( $[\text{M}] + \text{Na}^+$ ) calcd for  $\text{C}_{29}\text{H}_{23}\text{F}_3\text{O}_4\text{S}_2\text{Na}^+$  = 579.0882, Found 579.0883.

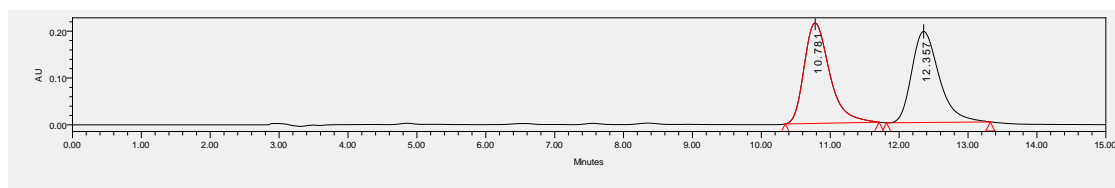

|   | Retention Time | Area    | % Area |
|---|----------------|---------|--------|
| 1 | 10.781         | 5509265 | 50.63  |
| 2 | 12.357         | 5371085 | 49.37  |

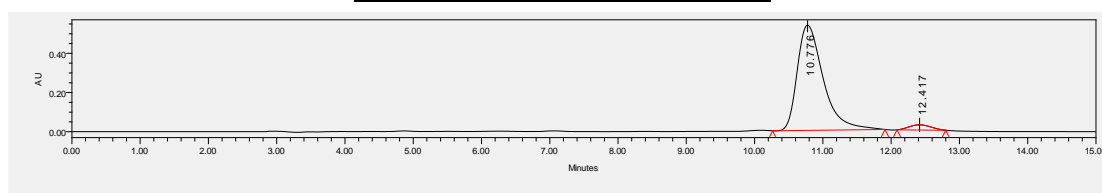

|   | Retention Time | Area     | % Area |
|---|----------------|----------|--------|
| 1 | 10.776         | 14217467 | 96.00  |
| 2 | 12.417         | 591849   | 4.00   |

**benzhydryl (S)-2-(methylthio)-2-(phenylsulfonyl)-2-(p-tolyl)acetate (C29)**

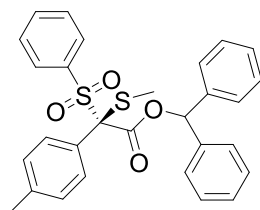

Colorless liquid. 86% yield, 83.5:16.5 er.  $[\alpha]^{24.3}_D = +37.2$  ( $c = 0.59$  in  $\text{CH}_2\text{Cl}_2$ ). Dissolved in hexane for HPLC; HPLC (Chiral ODH column,  $i\text{-PrOH}/n\text{-hexane} = 10/90$ , flow rate: 1.0 mL/min, 254 nm),  $t_R(\text{major}) = 11.84$  min,  $t_R(\text{minor}) = 14.57$  min.

$^1\text{H NMR}$  (400 MHz, Chloroform- $d$ )  $\delta = 7.39$  (d,  $J = 7.4$  Hz, 1H), 7.38 – 7.28 (m, 4H), 7.26 – 7.21 (m, 3H), 7.21 – 7.13 (m, 7H), 7.01 (s, 1H), 6.90 (q,  $J = 8.4$  Hz, 4H), 2.24 (s, 3H), 2.08 (s, 3H).

$^{13}\text{C NMR}$  (101 MHz, Chloroform- $d$ )  $\delta = 165.0, 139.6, 139.1, 138.8, 135.5, 133.5, 131.3, 129.4, 128.5, 128.4, 128.3, 128.2, 128.1, 127.5, 127.3, 127.2, 82.7, 79.2, 21.1, 15.0$ .

**IR** (neat): 3062, 1733, 1586, 1502, 1448, 1311, 1220, 1144, 1079, 951, 694  $\text{cm}^{-1}$ .

**HRMS** (ESI)  $m/z$ : ( $[\text{M}]+\text{Na}^+$ ) calcd for  $\text{C}_{29}\text{H}_{26}\text{O}_4\text{S}_2\text{Na}^+ = 525.1165$ , Found 525.1165.

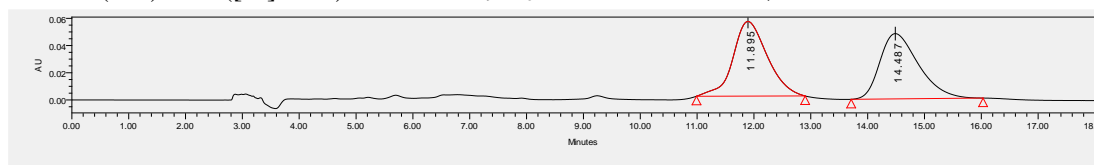

|   | Retention Time | Area    | % Area |
|---|----------------|---------|--------|
| 1 | 11.895         | 2307577 | 50.49  |
| 2 | 14.487         | 2263140 | 49.51  |

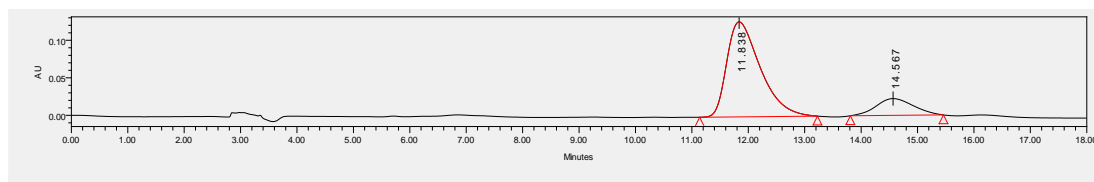

|   | Retention Time | Area    | % Area |
|---|----------------|---------|--------|
| 1 | 11.838         | 5215224 | 83.53  |
| 2 | 14.567         | 1028649 | 16.47  |

**benzhydryl (S)-2-(4-methoxyphenyl)-2-(methylthio)-2-(phenylsulfonyl)acetate (C30)**

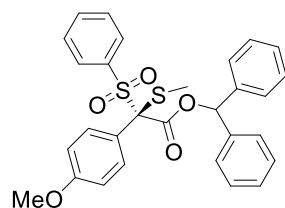

White solid. Melting point: 53.5-58.7 °C. 84% yield, 58.5:41.5 er.  $[\alpha]_{D}^{23.7} = +9.1$  ( $c = 0.59$  in  $\text{CH}_2\text{Cl}_2$ ). Dissolved in hexane for HPLC; HPLC (Chiral IA column,  $i\text{-PrOH}/n\text{-hexane} = 20/80$ , flow rate: 1.0 mL/min, 254 nm),  $t_R(\text{major}) = 13.13$  min,  $t_R(\text{minor}) = 15.88$  min.

**$^1\text{H NMR}$**  (400 MHz, Chloroform- $d$ )  $\delta = 7.51 - 7.45$  (m, 1H), 7.46 - 7.36 (m, 4H), 7.33 - 7.29 (m, 3H), 7.28 - 7.22 (m, 7H), 7.09 (s, 1H), 7.02 (d,  $J = 8.8$  Hz, 2H), 6.66 (d,  $J = 9.2$  Hz, 2H), 3.78 (s, 3H), 2.16 (s, 3H).

**$^{13}\text{C NMR}$**  (101 MHz, Chloroform- $d$ )  $\delta = 165.1, 160.3, 139.2, 138.8, 135.5, 133.5, 131.3, 131.0, 128.5, 128.4, 128.2, 128.1, 127.6, 127.3, 127.2, 123.3, 113.1, 82.3, 79.2, 55.3, 15.1$ .

**IR** (neat): 2925, 1734, 1606, 1509, 1450, 1305, 1257, 1223, 1181, 1029, 697  $\text{cm}^{-1}$ .

**HRMS** (ESI)  $m/z$ : ( $[\text{M}]+\text{Na}^+$ ) calcd for  $\text{C}_{29}\text{H}_{26}\text{O}_5\text{S}_2\text{Na}^+ = 541.1114$ , Found 541.1114.

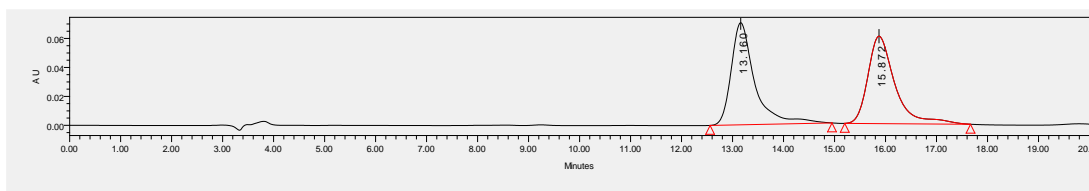

|   | Retention Time | Area    | % Area |
|---|----------------|---------|--------|
| 1 | 13.160         | 2255700 | 50.43  |
| 2 | 15.872         | 2216899 | 49.57  |

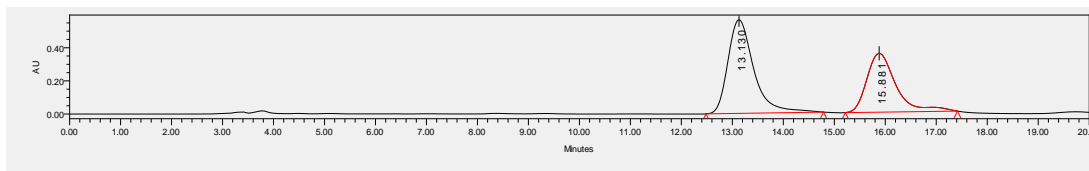

|   | Retention Time | Area     | % Area |
|---|----------------|----------|--------|
| 1 | 13.130         | 19837393 | 58.57  |
| 2 | 15.881         | 14032899 | 41.43  |

#### 4-fluorobenzyl (S)-2-(methylthio)-2-phenyl-2-tosylacetate (C31)

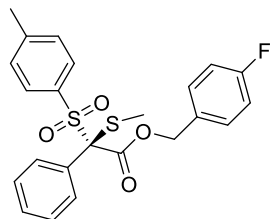

Yellow liquid. 78% yield, 89:11 er.  $[\alpha]^{22.3}_D = +39.5$  ( $c = 0.58$  in  $\text{CH}_2\text{Cl}_2$ ). Dissolved in hexane for HPLC; HPLC (Chiral IA column,  $i$ -PrOH/n-hexane = 10/90, flow rate: 1.0 mL/min, 254 nm),  $t_R(\text{major}) = 23.06$ ,  $t_R(\text{minor}) = 33.11$ .

$^1\text{H NMR}$  (400 MHz, Chloroform- $d$ )  $\delta = 7.39 - 7.30$  (m, 3H), 7.27 (d,  $J = 8.4$  Hz, 2H), 7.22 - 7.13 (m, 4H), 7.08 - 6.98 (m, 4H), 5.57 - 5.00 (m, 2H), 2.35 (s, 3H), 2.28 (s, 3H).

$^{13}\text{C NMR}$  (101 MHz, Chloroform- $d$ )  $\delta = 165.8$ , 162.8 (d, 248.6 Hz), 144.7, 132.4, 131.5, 131.3, 130.8 (d, 8.4 Hz), 130.4 (d, 3.2 Hz), 129.4, 129.4, 128.3, 127.8, 115.5 (d, 21.7 Hz), 82.7, 67.5, 21.6, 15.2.

$^{19}\text{F NMR}$  (376 MHz, Chloroform- $d$ )  $\delta = -112.66$ .

**IR** (neat): 2922, 1733, 1599, 1510, 1450, 1373, 1318, 1216, 1143, 1081, 1011, 968  $\text{cm}^{-1}$ .

**HRMS** (ESI)  $m/z$ : ( $[\text{M}]+\text{K}^+$ ) calcd for  $\text{C}_{23}\text{H}_{21}\text{FO}_4\text{S}_2\text{K}^+ = 483.0497$ , Found 484.0500.

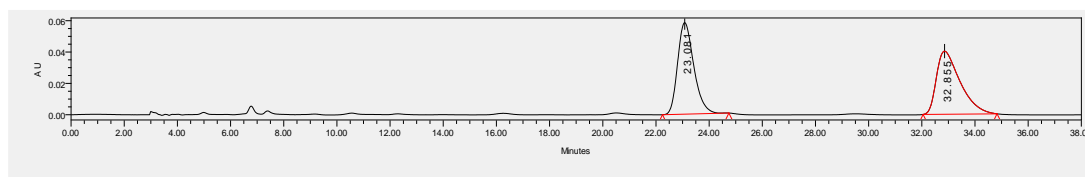

|   | Retention Time | Area    | % Area |
|---|----------------|---------|--------|
| 1 | 23.081         | 2469190 | 49.85  |
| 2 | 32.855         | 2484383 | 50.15  |

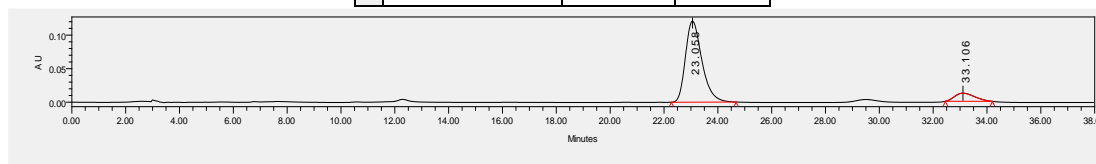

|   | Retention Time | Area    | % Area |
|---|----------------|---------|--------|
| 1 | 23.058         | 5125712 | 89.08  |
| 2 | 33.106         | 628149  | 10.92  |



**4-fluorobenzyl (S)-2-((4-fluorophenyl)sulfonyl)-2-(methylthio)-2-phenylacetate (C32)**

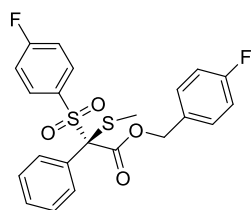

Yellow liquid. 72% yield, 90.5:9.5 er.  $[\alpha]_D^{28.2} = +30.9$  ( $c = 0.69$  in  $\text{CH}_2\text{Cl}_2$ ). Dissolved in hexane for HPLC; HPLC (Chiral IA column,  $i$ -PrOH/n-hexane = 10/90, flow rate: 1.0 mL/min, 254 nm),  $t_R(\text{major}) = 14.01$ ,  $t_R(\text{minor}) = 16.62$ .

**$^1\text{H NMR}$**  (400 MHz, Chloroform- $d$ )  $\delta = 7.43 - 7.31$  (m, 5H), 7.21 (t,  $J = 7.9$  Hz, 2H), 7.17 - 7.09 (m, 2H), 7.03 (t,  $J = 8.6$  Hz, 2H), 6.92 (t,  $J = 8.4$  Hz, 2H), 5.36 - 5.23 (m, 2H), 2.30 (s, 3H).

**$^{13}\text{C NMR}$**  (101 MHz, Chloroform- $d$ )  $\delta = 165.83$  (d, 257.9 Hz), 165.63, 162.9 (d, 249.0 Hz), 134.1 (d, 9.8 Hz), 131.4, 131.2 (d, 3.0 Hz), 130.9 (d, 8.4 Hz), 130.3 (d, 3.3 Hz), 129.7, 129.3, 127.9, 115.5 (d, 21.7 Hz), 114.9 (d, 22.6 Hz), 82.9, 67.6, 15.2.

**$^{19}\text{F NMR}$**  (376 MHz, Chloroform- $d$ )  $\delta = -103.18, -112.42$ .

**IR** (neat): 2926, 1735, 1591, 1504, 1449, 1325, 1220, 1146, 1082, 968, 828  $\text{cm}^{-1}$ .

**HRMS** (ESI)  $m/z$ : ( $[\text{M}]+\text{K}^+$ ) calcd for  $\text{C}_{22}\text{H}_{18}\text{F}_2\text{O}_4\text{S}_2\text{K}^+ = 487.0246$ , Found 487.0246.

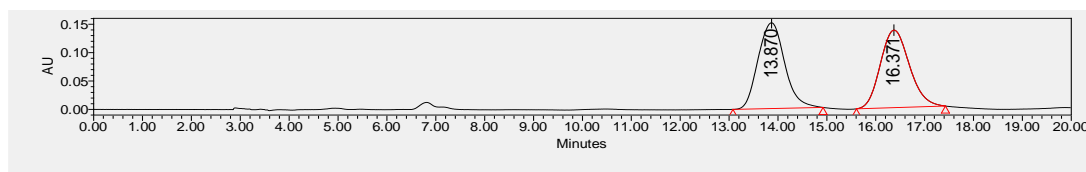

|   | Retention Time | Area    | % Area |
|---|----------------|---------|--------|
| 1 | 13.870         | 5705783 | 50.33  |
| 2 | 16.371         | 5631159 | 49.67  |

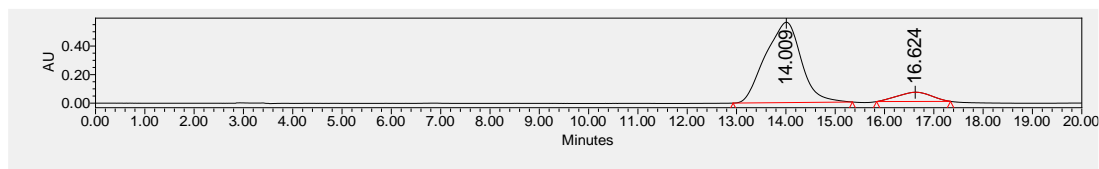

|   | Retention Time | Area     | % Area |
|---|----------------|----------|--------|
| 1 | 14.009         | 28203751 | 90.60  |
| 2 | 16.624         | 2927123  | 9.40   |

**4-fluorobenzyl (S)-2-((4-chlorophenyl)sulfonyl)-2-(methylthio)-2-phenylacetate (C33)**

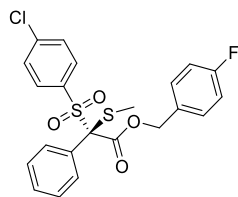

Yellow liquid. 90% yield, 90:10 er.  $[\alpha]^{28.1}_D = +26.6$  ( $c = 0.35$  in  $\text{CH}_2\text{Cl}_2$ ). Dissolved in hexane for HPLC; HPLC (Chiral IA column,  $i\text{-PrOH}/n\text{-hexane} = 10/90$ , flow rate: 1.0 mL/min, 254 nm),  $t_R(\text{major}) = 15.94$ ,  $t_R(\text{minor}) = 19.93$ .

$^1\text{H NMR}$  (400 MHz, Chloroform- $d$ )  $\delta = 7.40 - 7.27$  (m, 5H), 7.25 – 7.17 (m, 4H), 7.18 – 7.10 (m, 2H), 7.03 (t,  $J = 8.8$  Hz, 2H), 5.37 – 5.22 (m, 2H), 2.30 (s, 3H).

$^{13}\text{C NMR}$  (101 MHz, Chloroform- $d$ )  $\delta = 165.6$ , 162.9 (d, 249.0 Hz), 140.5, 133.9, 132.7, 131.2, 130.9 (d, 8.4 Hz), 130.2 (d, 3.3 Hz), 129.8, 129.3, 128.0, 127.9, 115.6 (d, 21.7 Hz), 83.1, 67.6, 15.3.

$^{19}\text{F NMR}$  (376 MHz, Chloroform- $d$ )  $\delta = -112.35$ .

**IR** (neat): 2923, 1735, 1511, 1454, 1324, 1219, 1148, 1088, 1012, 823  $\text{cm}^{-1}$ .

**HRMS(ESI) m/z:** ( $[\text{M}]+\text{K}^+$ ) calcd for  $\text{C}_{22}\text{H}_{18}^{35}\text{ClFO}_4\text{S}_2\text{K}^+ = 502.9951$ , Found 502.9951.

**HRMS(ESI) m/z:** ( $[\text{M}]+\text{K}^+$ ) calcd for  $\text{C}_{22}\text{H}_{18}^{37}\text{ClFO}_4\text{S}_2\text{K}^+ = 504.9921$ , Found 504.9921.

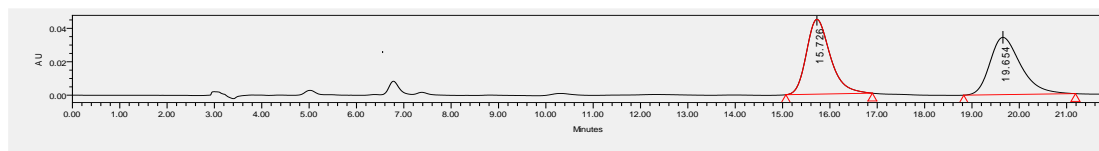

|   | Retention Time | Area    | % Area |
|---|----------------|---------|--------|
| 1 | 15.726         | 1566706 | 50.21  |
| 2 | 19.654         | 1553643 | 49.79  |

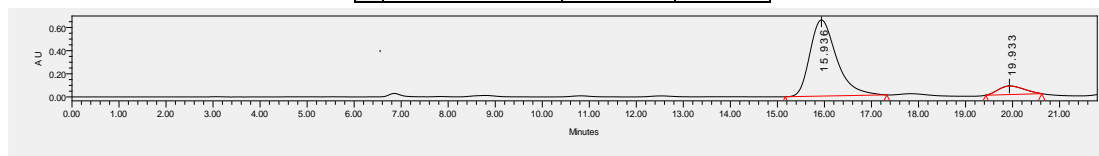

|   | Retention Time | Area     | % Area |
|---|----------------|----------|--------|
| 1 | 15.936         | 25847747 | 90.25  |
| 2 | 19.933         | 2791669  | 9.75   |

**4-fluorobenzyl (S)-2-((4-bromophenyl)sulfonyl)-2-(methylthio)-2-phenylacetate (C34)**

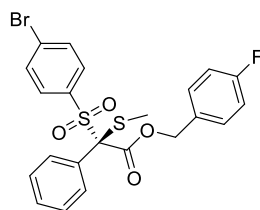

Yellow liquid. 81% yield, 88:12 er.  $[\alpha]_{D}^{27.8} = +29.5$  ( $c = 0.81$  in  $\text{CH}_2\text{Cl}_2$ ). Dissolved in hexane for HPLC; HPLC (Chiral IA column,  $i\text{-PrOH}/n\text{-hexane} = 10/90$ , flow rate: 1.0 mL/min, 254 nm),  $t_R(\text{major}) = 17.66$ ,  $t_R(\text{minor}) = 22.37$ .

**$^1\text{H NMR}$**  (400 MHz, Chloroform- $d$ )  $\delta = 7.42 - 7.32$  (m, 5H), 7.26 - 7.17 (m, 4H), 7.17 - 7.12 (m, 2H), 7.08 - 7.00 (m, 2H), 5.43 - 5.16 (m, 2H), 2.30 (s, 3H).

**$^{13}\text{C NMR}$**  (101 MHz, Chloroform- $d$ )  $\delta = 165.6$ , 162.9 (d, 249.0 Hz), 134.5, 132.7, 131.2, 131.0, 130.9, 130.2 (d, 3.3 Hz), 129.8, 129.3 (d, 8.1 Hz), 128.0, 115.6 (d, 21.7 Hz), 83.1, 67.6, 15.3.

**$^{19}\text{F NMR}$**  (376 MHz, Chloroform- $d$ )  $\delta = -112.33$ .

**IR** (neat): 2927, 1734, 1605, 1571, 1511, 1451, 1384, 1324, 1219, 1147, 1072  $\text{cm}^{-1}$ .

**HRMS** (ESI)  $m/z$ :  $([\text{M}]+\text{K}^+)$  calcd for  $\text{C}_{22}\text{H}_{18}^{79}\text{BrFO}_4\text{S}_2\text{K}^+ = 546.9445$ , Found 546.9439.

**HRMS** (ESI)  $m/z$ :  $([\text{M}]+\text{K}^+)$  calcd for  $\text{C}_{22}\text{H}_{18}^{81}\text{BrFO}_4\text{S}_2\text{K}^+ = 548.9425$ , Found 548.9418.

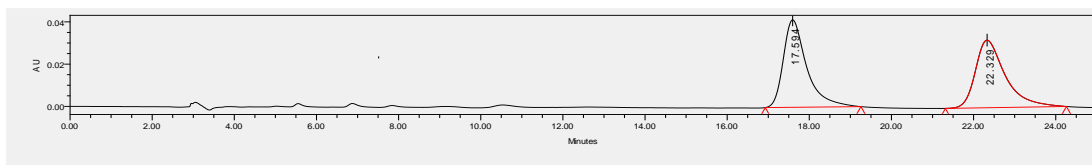

|   | Retention Time | Area    | % Area |
|---|----------------|---------|--------|
| 1 | 17.594         | 1638146 | 50.36  |
| 2 | 22.329         | 1614406 | 49.64  |

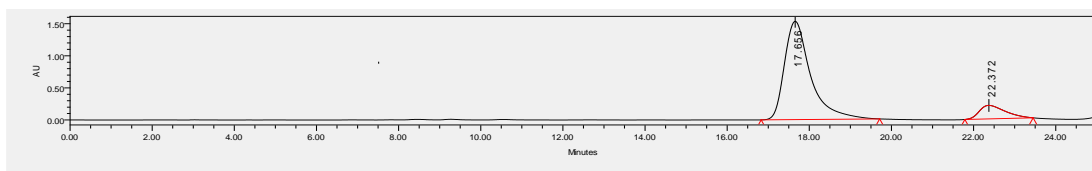

|   | Retention Time | Area     | % Area |
|---|----------------|----------|--------|
| 1 | 17.666         | 67720648 | 88.01  |
| 2 | 22.372         | 9221717  | 11.99  |

**4-fluorobenzyl (S)-2-(methylthio)-2-(naphthalen-2-ylsulfonyl)-2-phenylacetate (C35)**

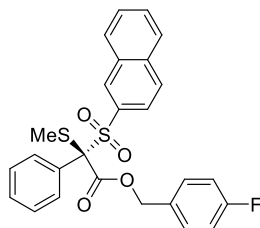

Yellow liquid. 89% yield, 89:11 er.  $[\alpha]_{D}^{27.2} = +27.4$  ( $c = 1.0$  in  $\text{CH}_2\text{Cl}_2$ ). Dissolved in hexane for HPLC; HPLC (Chiral IA column,  $i\text{-PrOH/n-hexane} = 20/80$ , flow rate: 1.0 mL/min, 254 nm),  $t_R(\text{major}) = 15.84$ ,  $t_R(\text{minor}) = 21.15$ .

**$^1\text{H NMR}$**  (400 MHz, Chloroform- $d$ )  $\delta = 7.91$  (s, 1H), 7.82 (d,  $J = 8.0$  Hz, 1H), 7.75 – 7.57 (m, 3H), 7.58 – 7.48 (m, 1H), 7.40 – 7.28 (m, 4H), 7.21 – 7.10 (m, 4H), 7.00 (t,  $J = 8.8$  Hz, 2H), 5.38 – 5.20 (m, 2H), 2.34 (s, 3H).

**$^{13}\text{C NMR}$**  (101 MHz, Chloroform- $d$ )  $\delta = 165.8$ , 162.8 (d, 248.7 Hz), 135.2, 133.6, 132.4, 131.6, 131.3, 130.8 (d, 8.4 Hz), 130.4 (d, 3.2 Hz) 129.6, 129.5, 129.3, 127.8, 127.6, 127.2, 127.1, 125.7, 115.5 (d, 21.7 Hz), 83.1, 67.6, 15.3.

**$^{19}\text{F NMR}$**  (376 MHz, Chloroform- $d$ )  $\delta = -112.56$ .

**IR** (neat): 2921, 1734, 1604, 1509, 1452, 1374, 1316, 1216, 1143, 1070, 818  $\text{cm}^{-1}$ .

**HRMS** (ESI)  $m/z$ : ( $[\text{M}]+\text{K}^+$ ) calcd for  $\text{C}_{26}\text{H}_{21}\text{FO}_4\text{S}_2\text{K}^+$  = 519.0497, Found 519.0497.

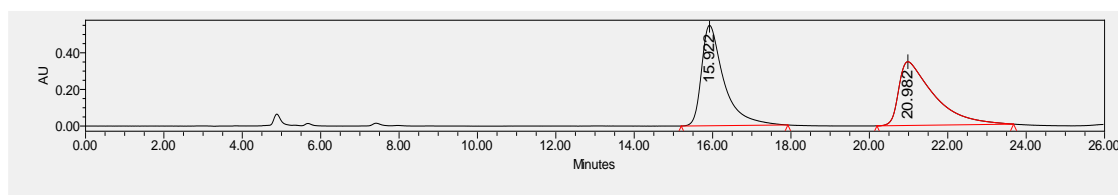

|   | Retention Time | Area     | % Area |
|---|----------------|----------|--------|
| 1 | 15.922         | 21695704 | 50.14  |
| 2 | 20.982         | 21576510 | 49.86  |

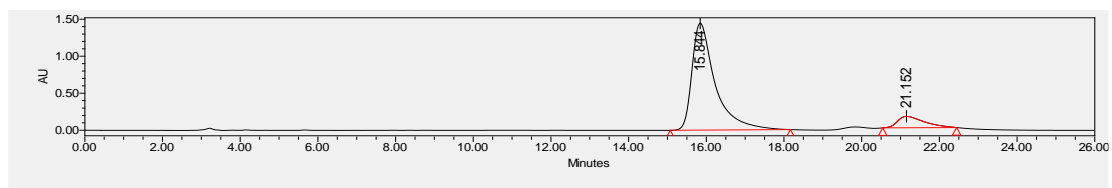

|   | Retention Time | Area     | % Area |
|---|----------------|----------|--------|
| 1 | 15.844         | 59949790 | 89.03  |
| 2 | 21.152         | 7383796  | 10.97  |

#### 4-fluorobenzyl (S)-2-(ethylthio)-2-phenyl-2-(phenylsulfonyl)acetate (C36)

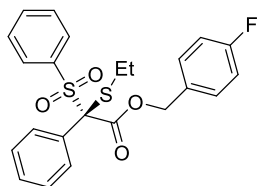

Yellow liquid. 81% yield, 73:27 er.  $[\alpha]_{D}^{27.8} = +18.5$  ( $c = 1.5$  in  $\text{CH}_2\text{Cl}_2$ ). Dissolved in hexane for HPLC; HPLC (Chiral IA column, *i*-PrOH/n-hexane = 10/90, flow rate: 1.0 mL/min, 254 nm),  $t_R(\text{major}) = 15.57$ ,  $t_R(\text{minor}) = 18.73$ .

$^1\text{H NMR}$  (400 MHz, Chloroform-*d*)  $\delta = 7.49$  (t,  $J = 7.4$  Hz, 1H), 7.44 – 7.29 (m, 5H), 7.31 – 7.23 (m, 3H), 7.21 – 7.11 (m, 4H), 7.03 (t,  $J = 8.6$  Hz, 2H), 5.39 – 5.21 (m, 2H), 3.23 – 2.99 (m, 1H), 2.61 – 2.44 (m, 1H), 1.17 (t,  $J = 7.6$  Hz, 3H).

$^{13}\text{C NMR}$  (101 MHz, Chloroform-*d*)  $\delta = 166.0$ , 162.8 (d, 248.7 Hz), 135.4, 133.6, 131.6, 131.3, 130.9 (d, 8.4 Hz), 130.3 (d, 3.3 Hz), 129.5, 129.4, 127.8, 127.6, 115.5 (d, 21.7 Hz), 83.2, 67.5, 26.4, 13.1.

$^{19}\text{F NMR}$  (376 MHz, Chloroform-*d*)  $\delta = -112.62$ .

**IR** (neat): 2925, 1734, 1605, 1510, 1488, 1374, 1316, 1217, 1146, 1079, 823, 756  $\text{cm}^{-1}$ .

**HRMS** (ESI)  $m/z$ : ( $[\text{M}] + \text{K}^+$ ) calcd for  $\text{C}_{23}\text{H}_{21}\text{FO}_4\text{S}_2\text{K}^+ = 483.0497$ , Found 484.0500.

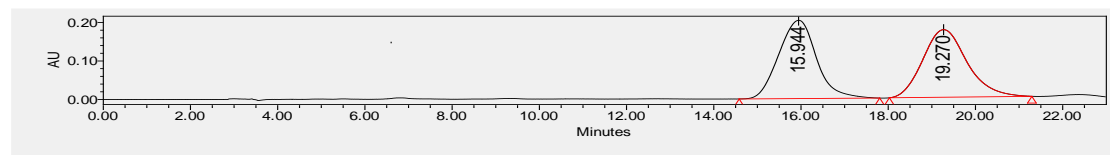

|   | Retention Time | Area     | % Area |
|---|----------------|----------|--------|
| 1 | 15.944         | 12212235 | 49.72  |
| 2 | 19.270         | 12349786 | 50.28  |

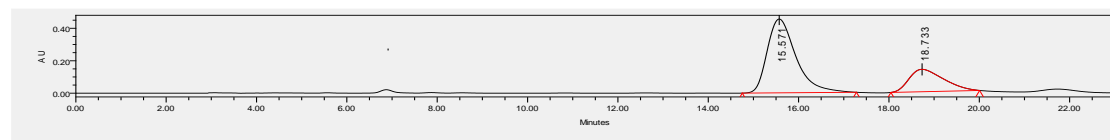

|   | Retention Time | Area     | % Area |
|---|----------------|----------|--------|
| 1 | 15.571         | 20037611 | 73.27  |
| 2 | 18.733         | 7311070  | 26.73  |

#### 4-fluorobenzyl (S)-2-phenyl-2-(propylthio)-2-tosylacetate (C37)

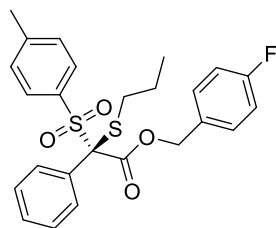

Yellow liquid. 47% yield, 62:38 er.  $[\alpha]^{20.9}_D = +7.1$  ( $c = 0.64$  in  $\text{CH}_2\text{Cl}_2$ ). Dissolved in hexane for HPLC; HPLC (Chiral ODH column, *i*-PrOH/n-hexane = 10/90, flow rate: 1.0 mL/min, 254 nm),  $t_R(\text{major}) = 18.62$ ,  $t_R(\text{minor}) = 14.06$ .

**$^1\text{H}$  NMR** (400 MHz, Chloroform- $d$ )  $\delta = 7.42 - 7.35$  (m, 2H), 7.32 (d,  $J = 7.2$  Hz, 1H), 7.30 - 7.23 (m, 2H), 7.22 - 7.12 (m, 4H), 7.10 - 6.99 (m, 4H), 5.34 (d,  $J = 12.0$  Hz, 1H), 5.22 (d,  $J = 12.0$  Hz, 1H), 3.10 - 2.98 (m, 1H), 2.48 - 2.39 (m, 1H), 2.36 (s, 3H), 1.58 - 1.44 (m, 2H), 0.91 (t,  $J = 7.2$  Hz, 3H).

**$^{13}\text{C}$  NMR** (101 MHz, Chloroform- $d$ )  $\delta = 166.2$ , 162.8 (d, 248.7 Hz), 144.7, 132.4, 131.8, 131.4, 131.1 (d, 8.4 Hz), 130.4 (d, 3.2 Hz), 129.5, 129.4, 128.3, 127.8, 115.5 (d, 21.6 Hz), 82.8, 67.4, 34.0, 21.8, 21.6, 13.5.

**$^{19}\text{F}$  NMR** (377 MHz,  $\text{CDCl}_3$ )  $\delta = -112.68$ .

**IR** (neat): 2963, 1734, 1601, 1510, 1451, 1375, 1319, 1217, 1146, 1082, 818, 698  $\text{cm}^{-1}$ .

**HRMS** (ESI)  $m/z$ : ( $[\text{M}] + \text{Na}^+$ ) calcd for  $\text{C}_{25}\text{H}_{25}\text{FO}_4\text{S}_2\text{Na}^+$  = 495.1071, Found 495.1071.

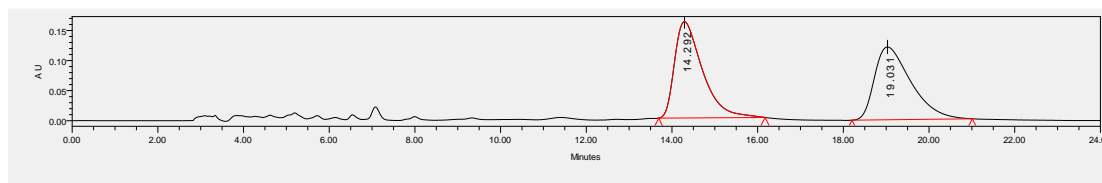

|   | Retention Time | Area    | % Area |
|---|----------------|---------|--------|
| 1 | 14.292         | 7240762 | 50.35  |
| 2 | 19.031         | 7140362 | 49.65  |

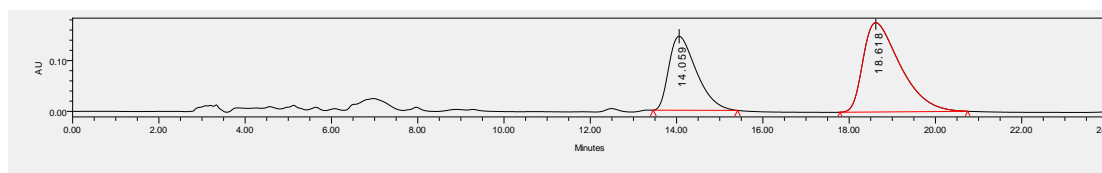

|   | Retention Time | Area     | % Area |
|---|----------------|----------|--------|
| 1 | 14.059         | 6442365  | 37.97  |
| 2 | 18.618         | 10522762 | 62.03  |

**benzhydryl (S)-2-(methylsulfonyl)-2-phenyl-2-(phenylsulfonyl)acetate (D1)**

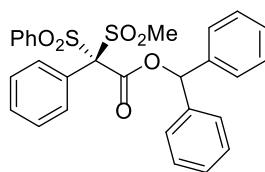

White solid. Melting point: 70.1-74.7 °C. 70% yield, 94:6 er.  $[\alpha]_{21.6}^{25} = +18.8$  ( $c = 0.63$  in  $\text{CH}_2\text{Cl}_2$ ).

Dissolved in hexane for HPLC; HPLC (Chiral IB column, *i*-PrOH/n-hexane = 10/90, flow rate: 1.0 mL/min, 254 nm),  $t_R(\text{major}) = 17.06$ ,  $t_R(\text{minor}) = 19.97$ .

$^1\text{H NMR}$  (400 MHz, Chloroform-*d*)  $\delta = 7.54$  (d,  $J = 7.2$  Hz, 2H), 7.52 – 7.41 (m, 3H), 7.44 – 7.35 (m, 3H), 7.37 – 7.29 (m, 7H), 7.29 – 7.17 (m, 5H), 7.10 (s, 1H), 3.05 (s, 3H).

$^{13}\text{C NMR}$  (101 MHz, Chloroform-*d*)  $\delta = 162.6, 138.0, 137.9, 136.3, 134.5, 131.9, 131.3, 130.4, 128.6, 128.5, 128.5, 128.2, 127.8, 127.6, 127.5, 127.2, 96.7, 81.2, 42.2$ .

**IR** (neat): 3063, 1736, 1585, 1495, 1450, 1334, 1227, 1146, 1077, 996, 956, 847, 751, 695.  $\text{cm}^{-1}$ .

**HRMS** (ESI)  $m/z$ : ( $[\text{M}]+\text{K}^+$ ) calcd for  $\text{C}_{28}\text{H}_{24}\text{O}_6\text{S}_2\text{K}^+ = 559.0646$ , Found 559.0646.

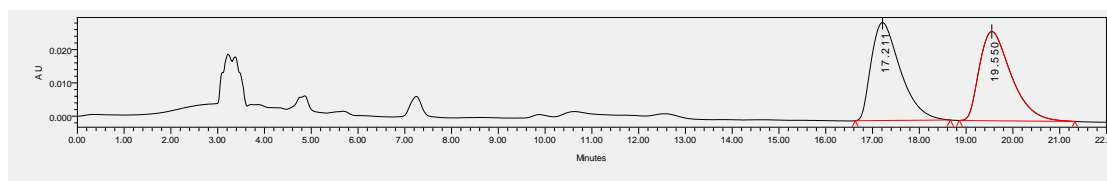

|   | Retention Time | Area    | % Area |
|---|----------------|---------|--------|
| 1 | 17.211         | 1272631 | 50.13  |
| 2 | 19.550         | 1265920 | 49.87  |

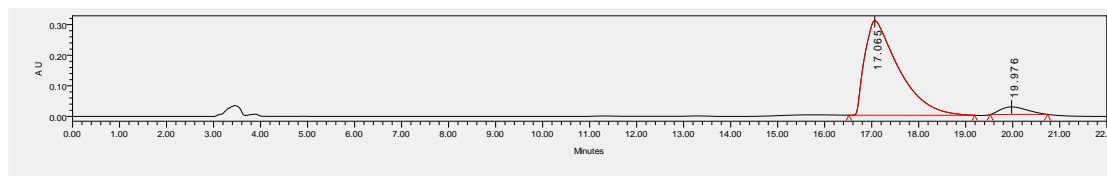

|   | Retention Time | Area     | % Area |
|---|----------------|----------|--------|
| 1 | 17.065         | 15473695 | 94.01  |
| 2 | 19.976         | 985169   | 5.99   |

## 8. Copies of NMR spectra of products

Figure S1.  $^1\text{H}$  NMR of C4

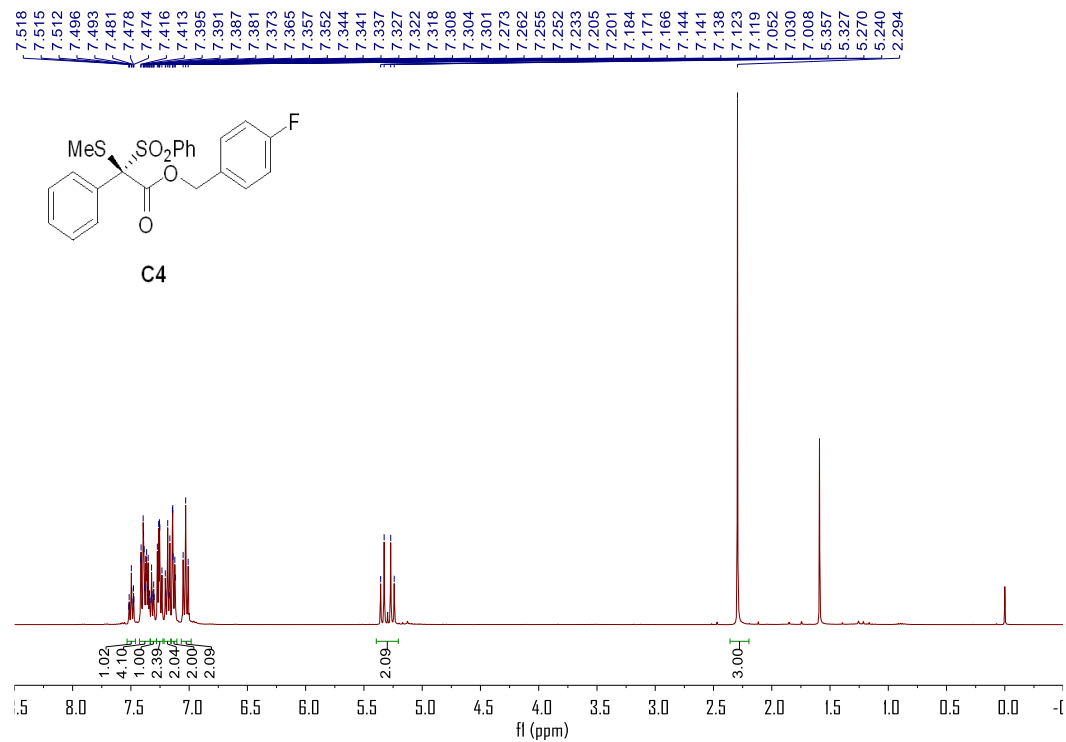

Figure S2.  $^{13}\text{C}\{^1\text{H}\}$  NMR of C4

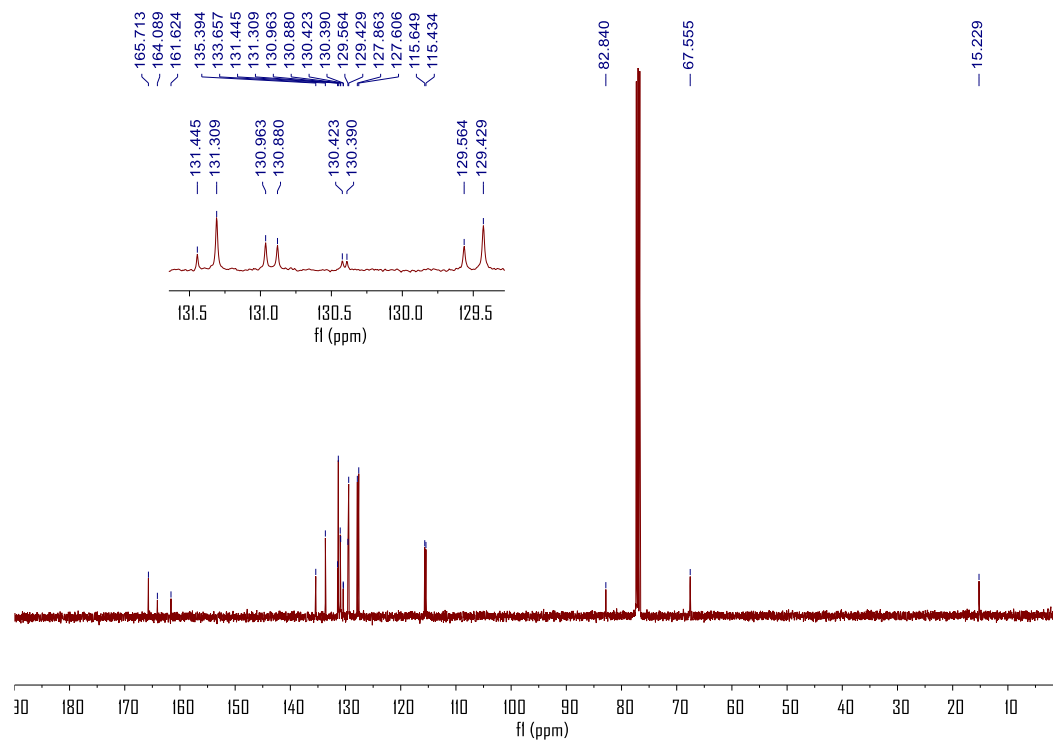



Figure S3.  $^{19}\text{F}$  NMR of C4

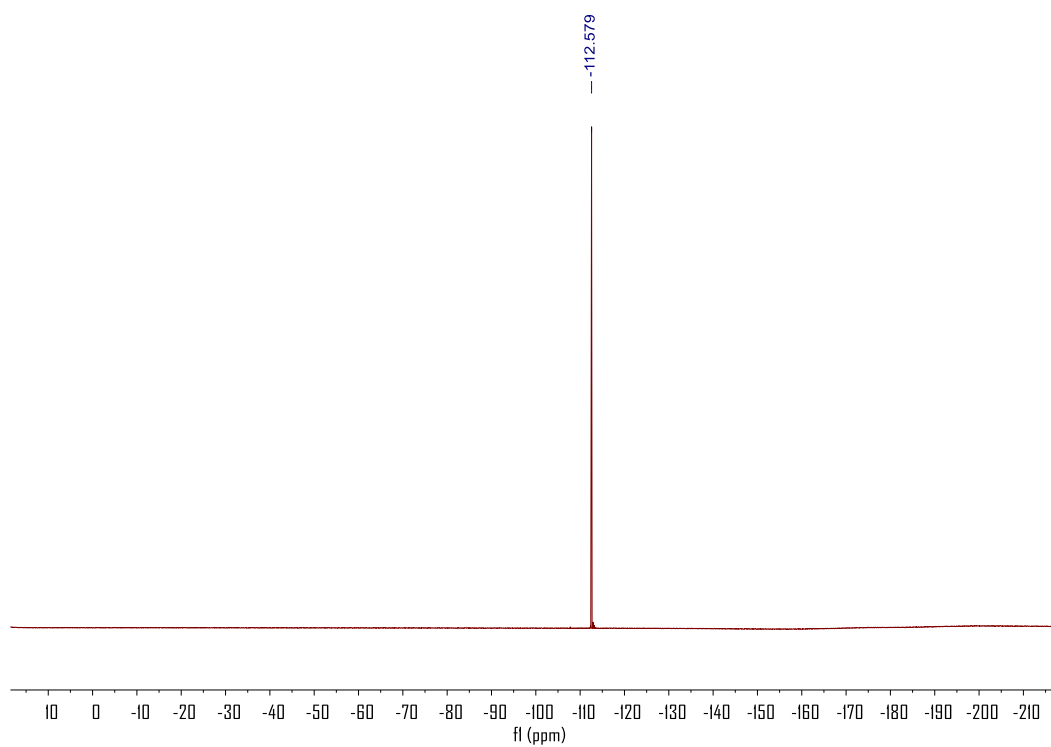

Figure S4.  $^1\text{H}$  NMR of C5

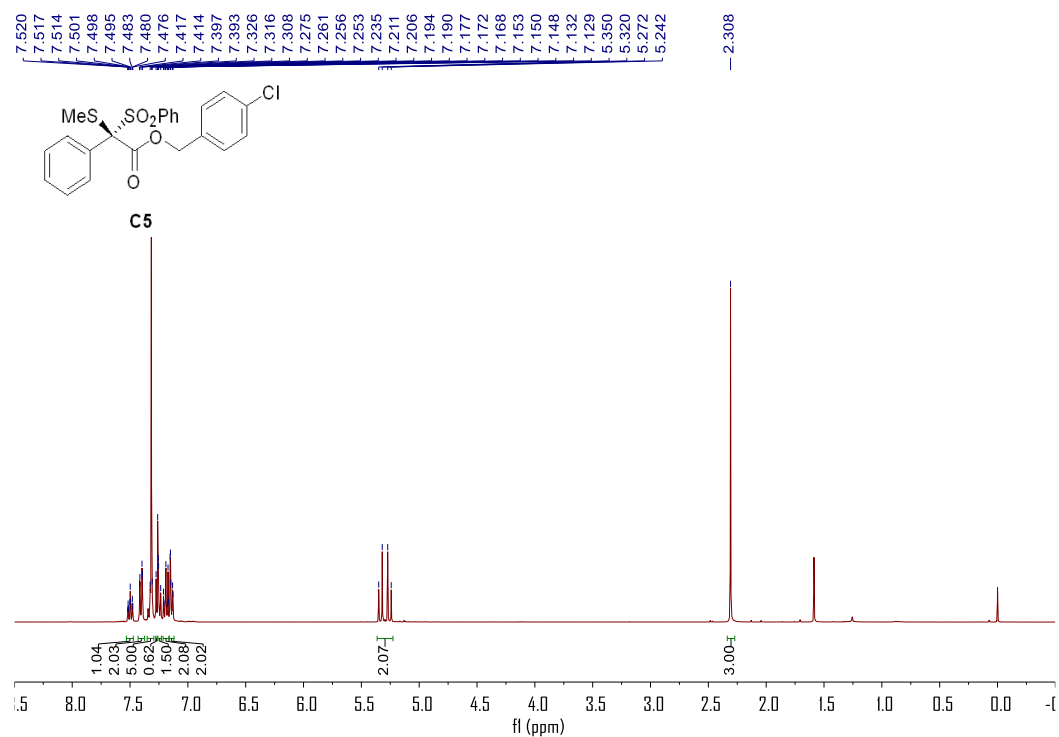

Figure S5.  $^{13}\text{C}\{^1\text{H}\}$  NMR of C5

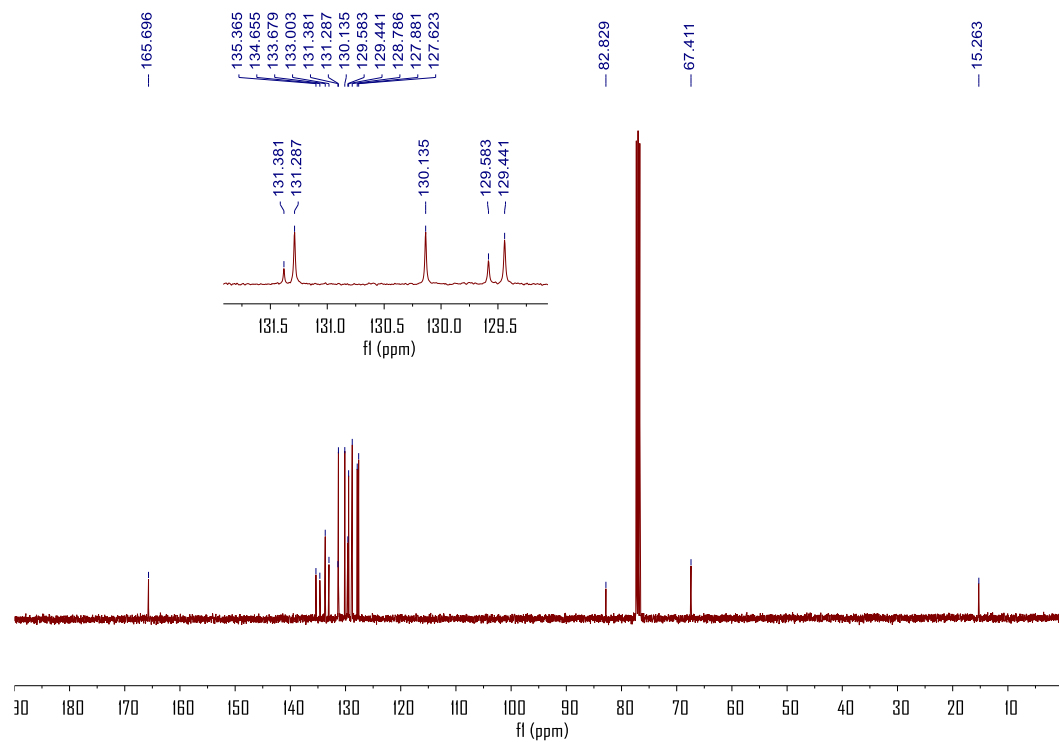

Figure S6.  $^1\text{H}$  NMR of C6

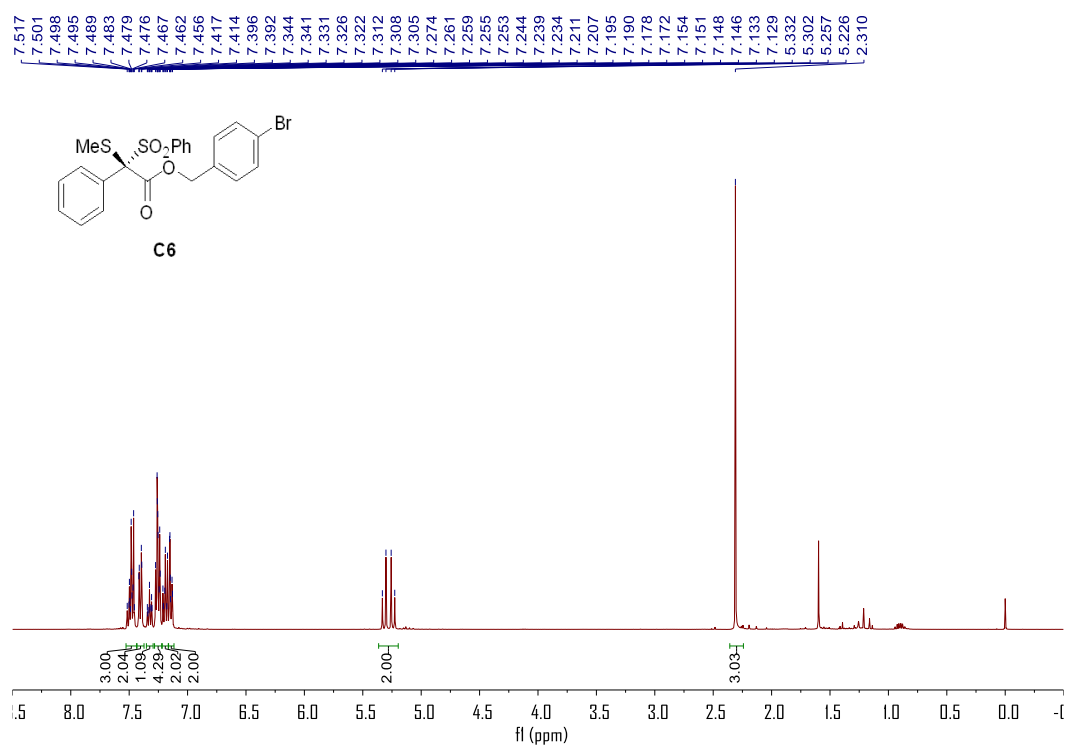

Figure S7.  $^{13}\text{C}\{^1\text{H}\}$  NMR of C6

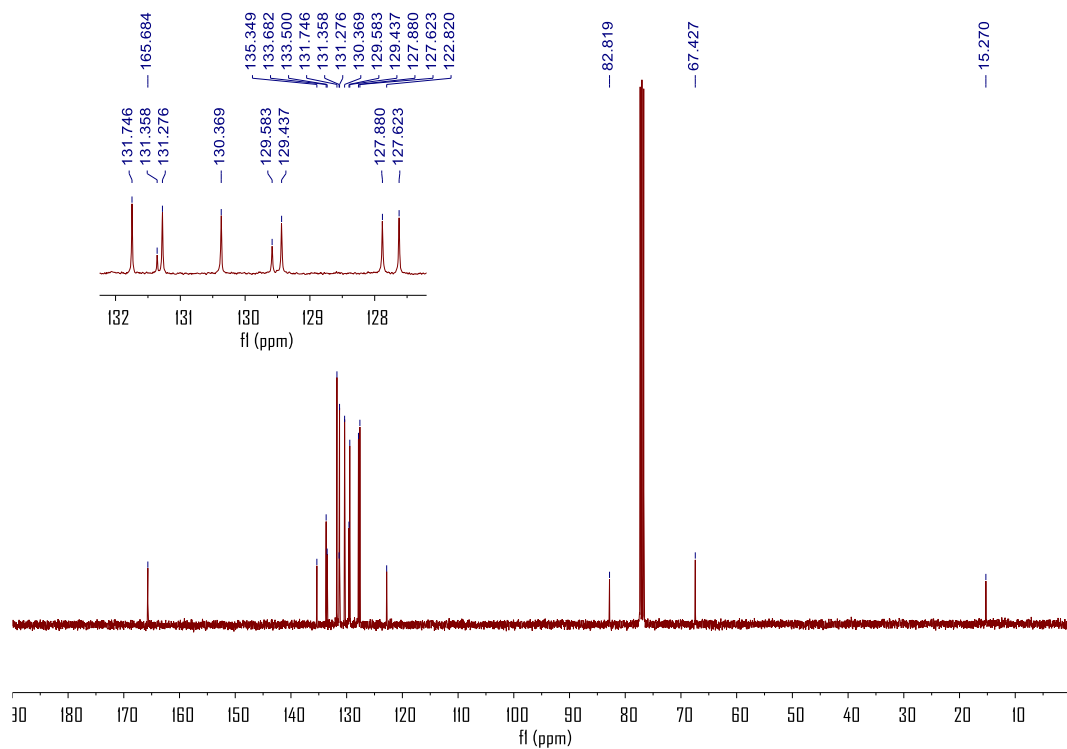

Figure S8.  $^1\text{H}$  NMR of C7

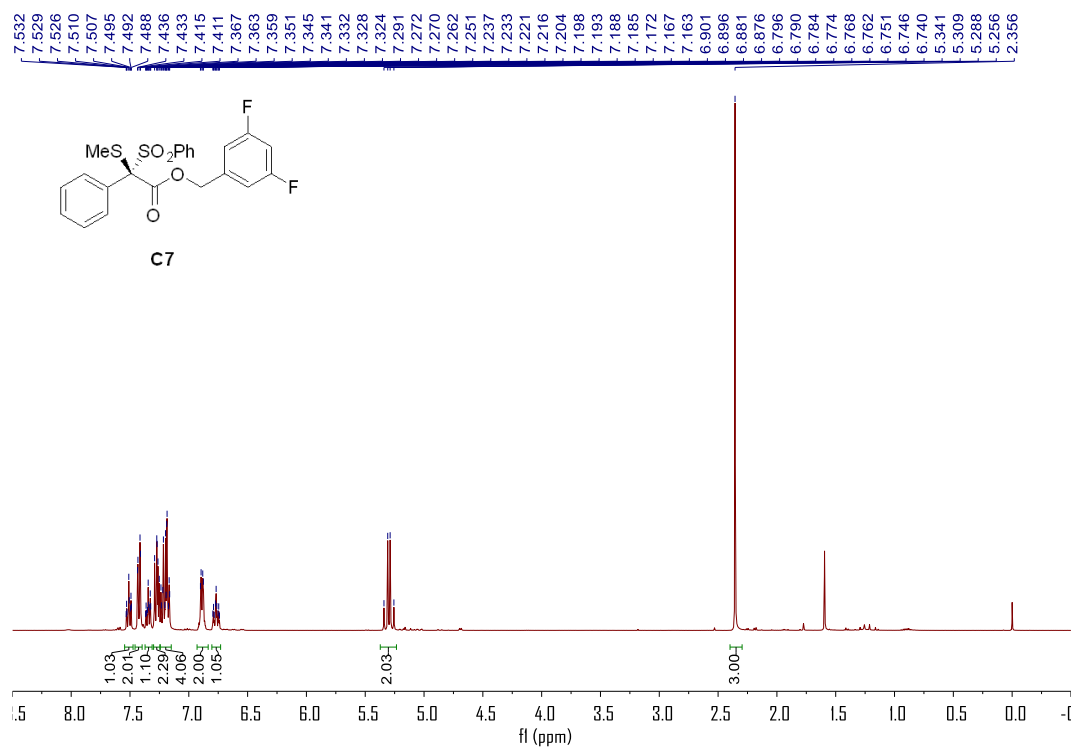

Figure S9.  $^{13}\text{C}\{^1\text{H}\}$  NMR of C7

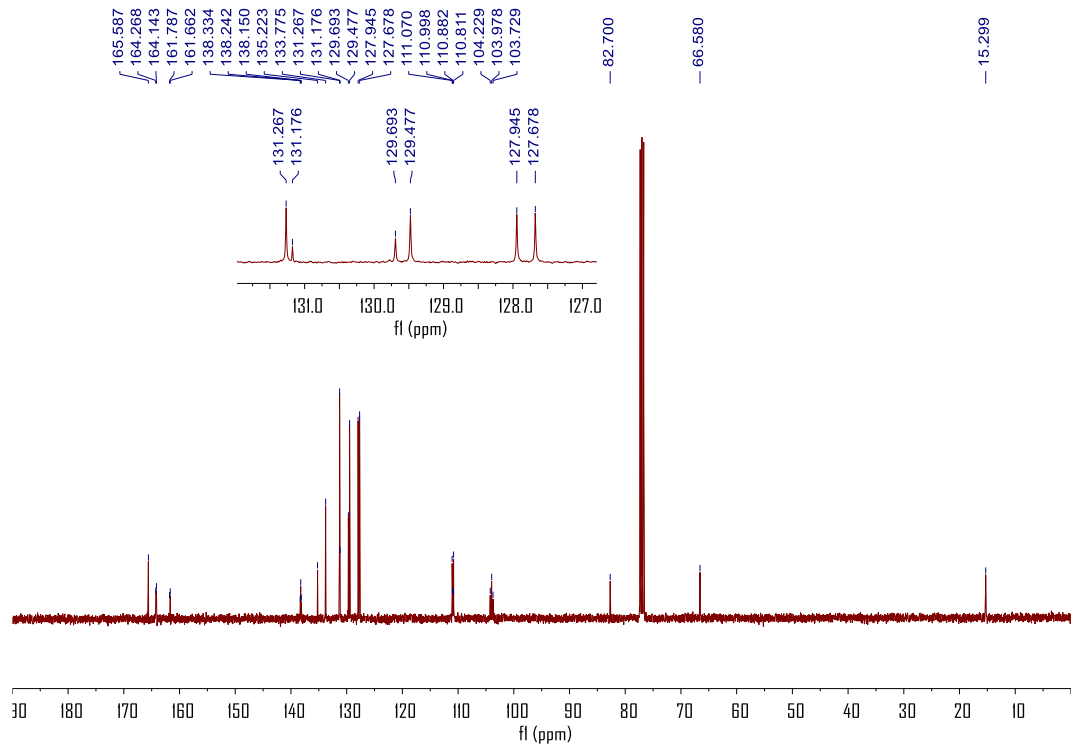

Figure S10.  $^{19}\text{F}$  NMR of C7

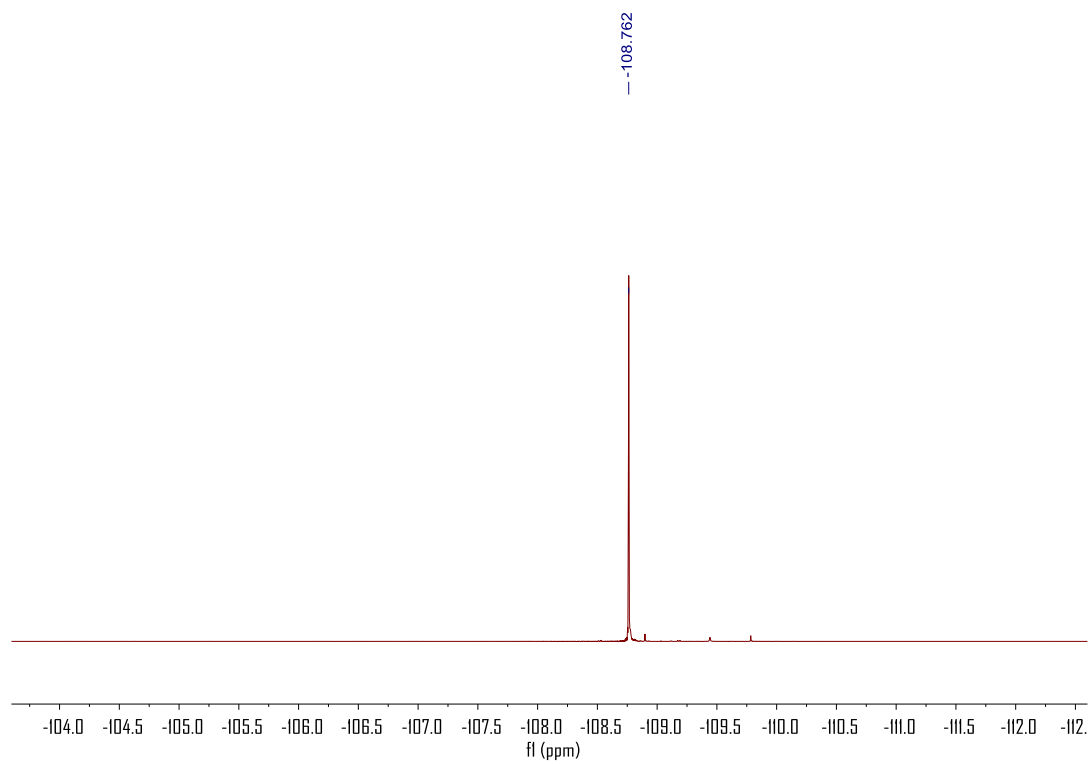

Figure S11. <sup>1</sup>H NMR of C8

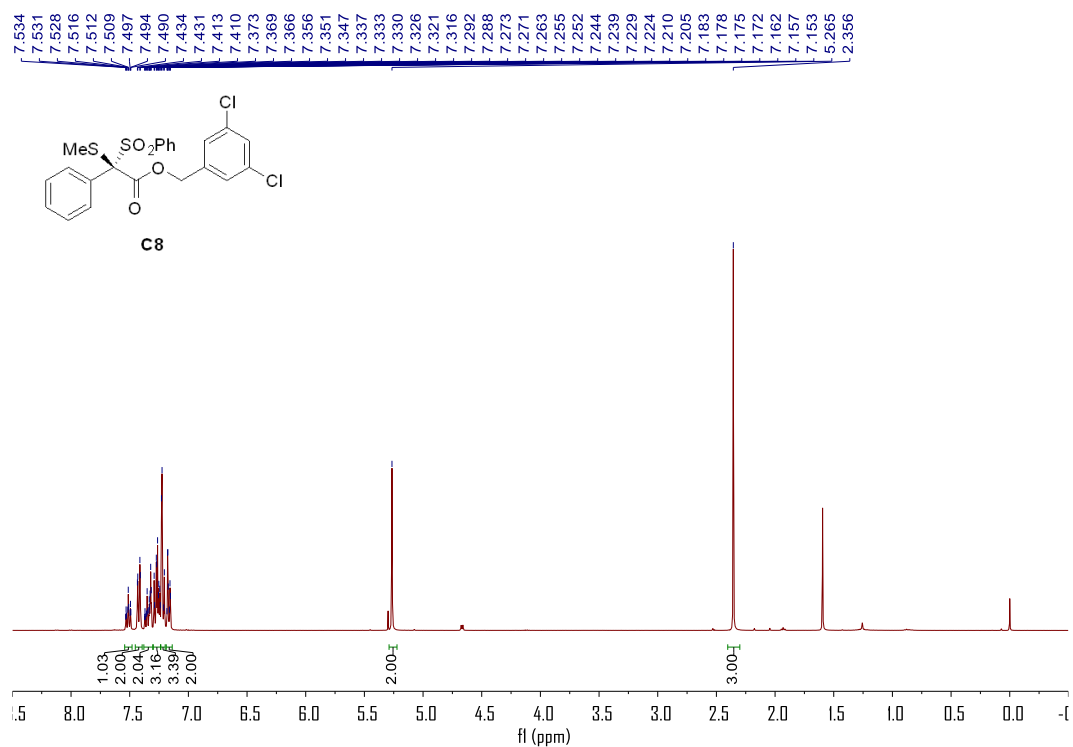

Figure S12. <sup>13</sup>C{<sup>1</sup>H} NMR of C8

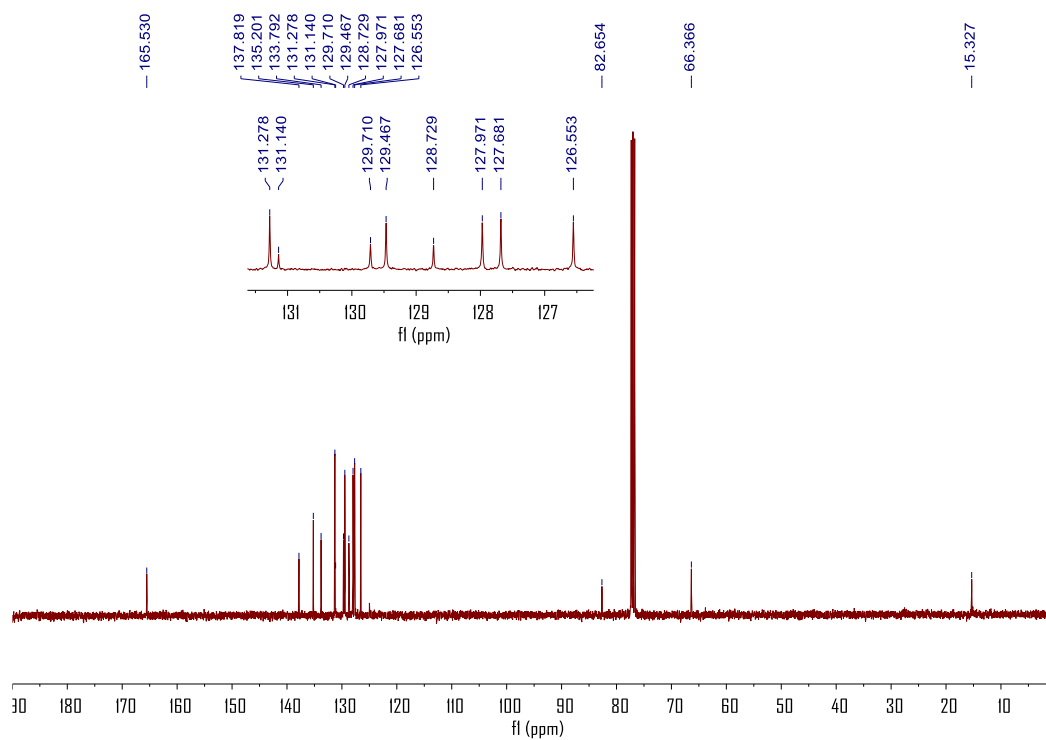

Figure S13.  $^1\text{H}$  NMR of C9

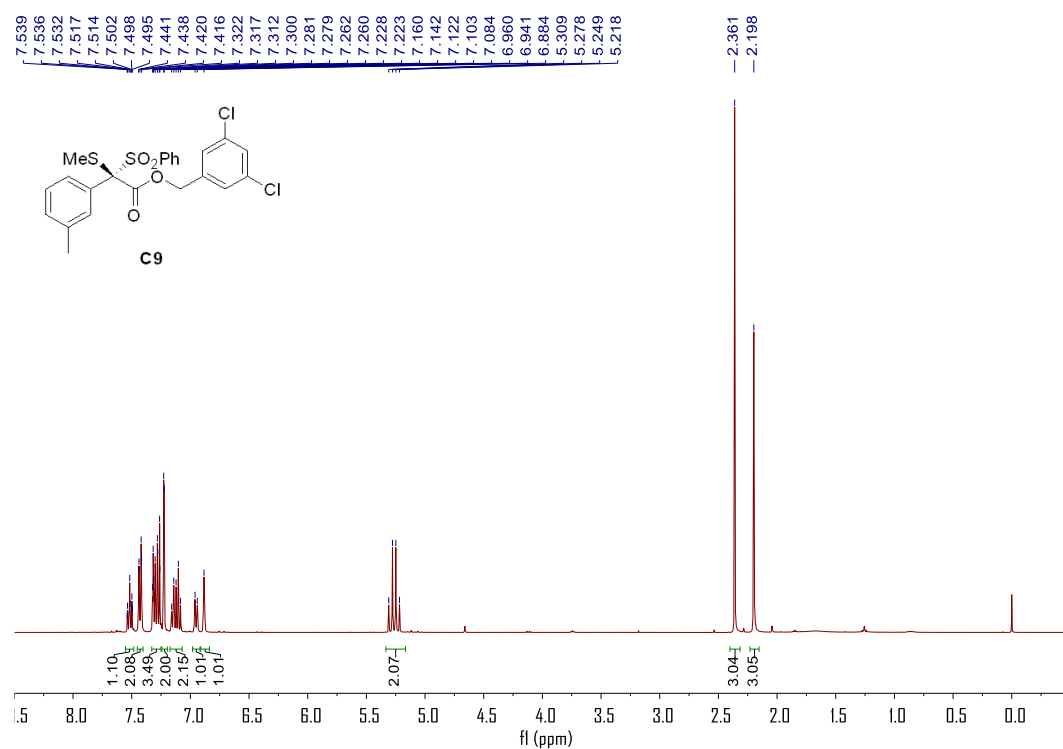

Figure S14.  $^{13}\text{C}\{^1\text{H}\}$  NMR of C9

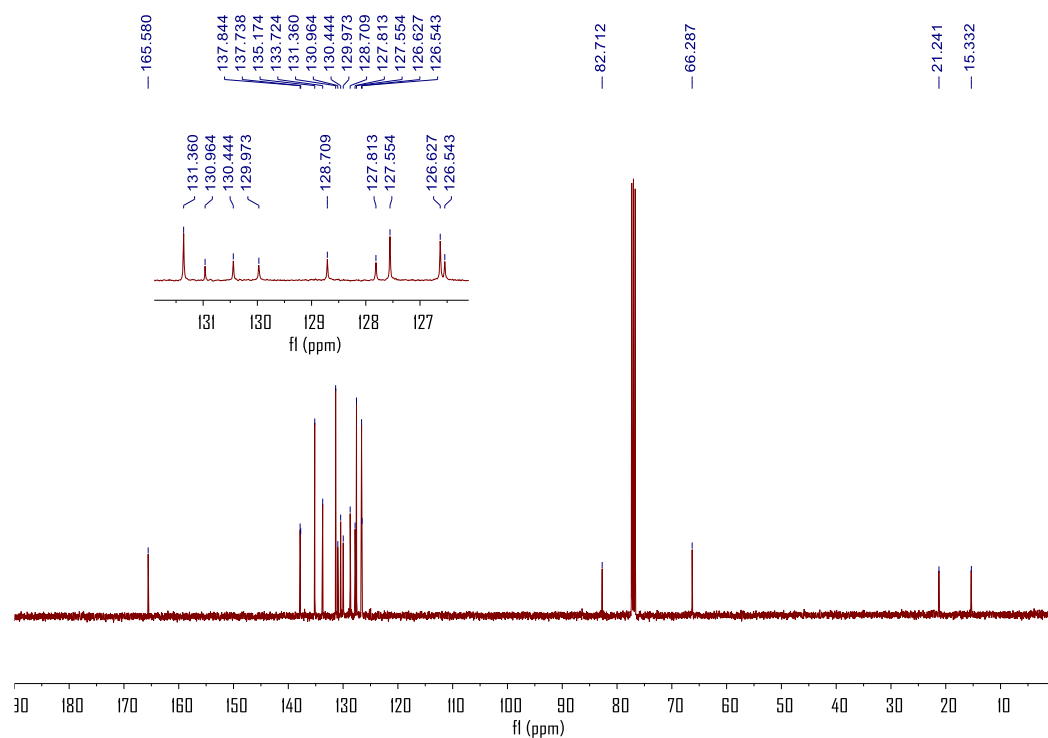

Figure S15.  $^1\text{H}$  NMR of C10

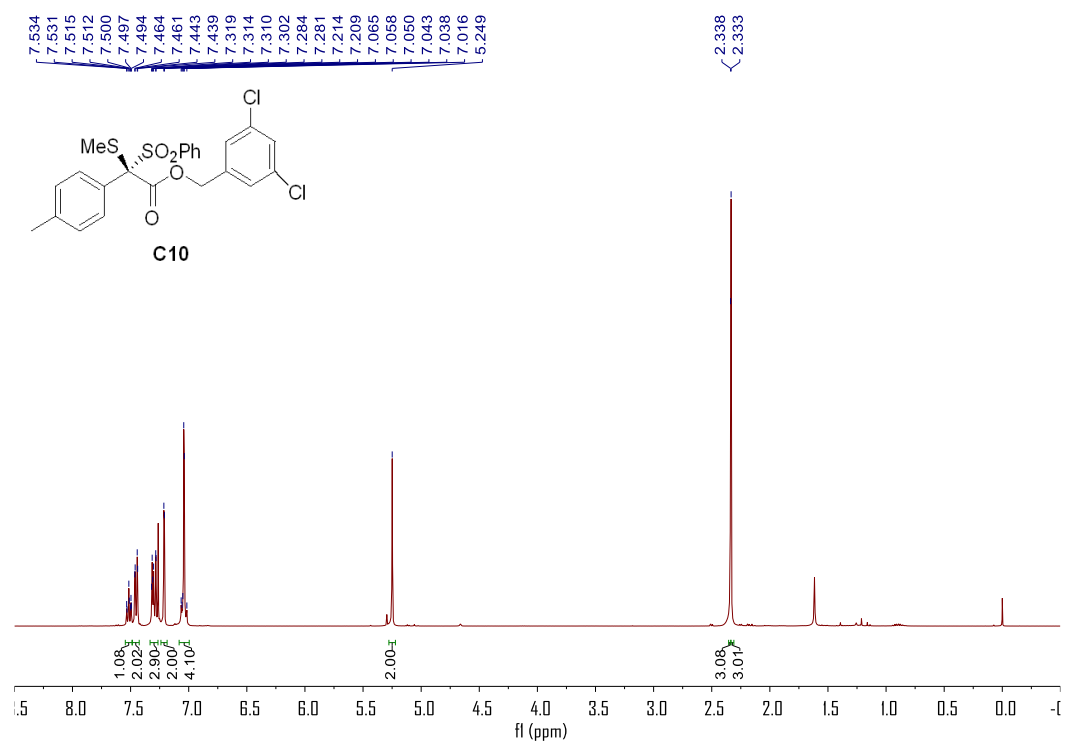

Figure S16.  $^{13}\text{C}\{^1\text{H}\}$  NMR of C10

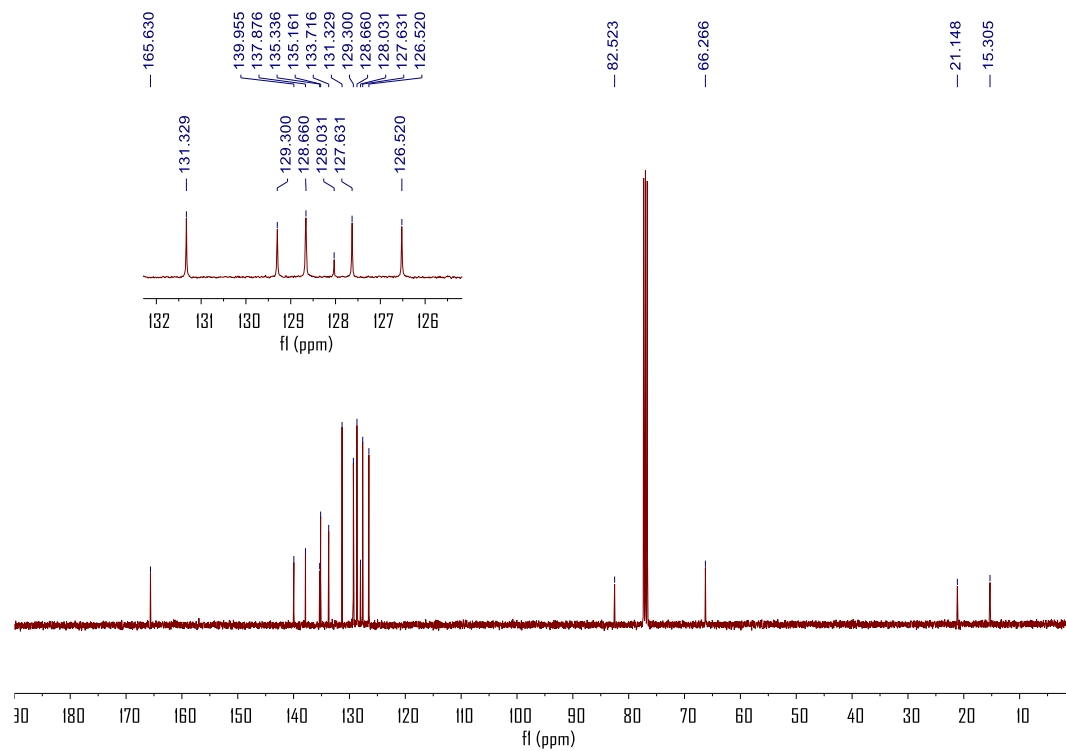



Figure S17. <sup>1</sup>H NMR of C11

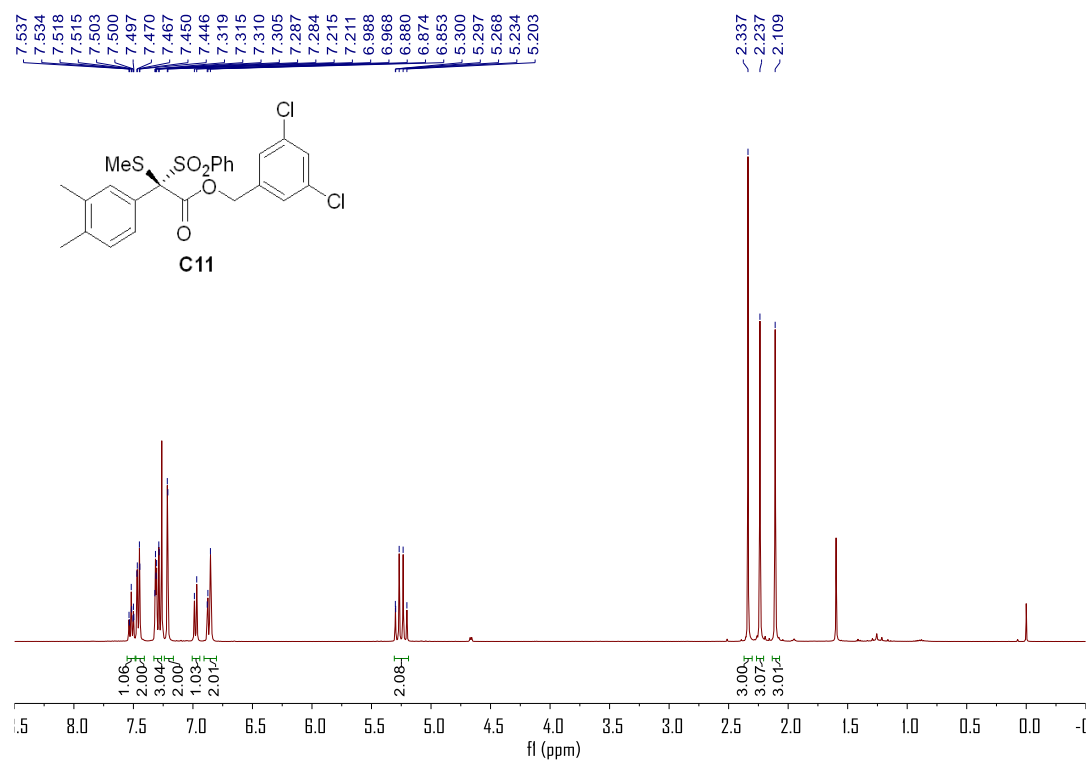

Figure S18. <sup>13</sup>C{<sup>1</sup>H} NMR of C11

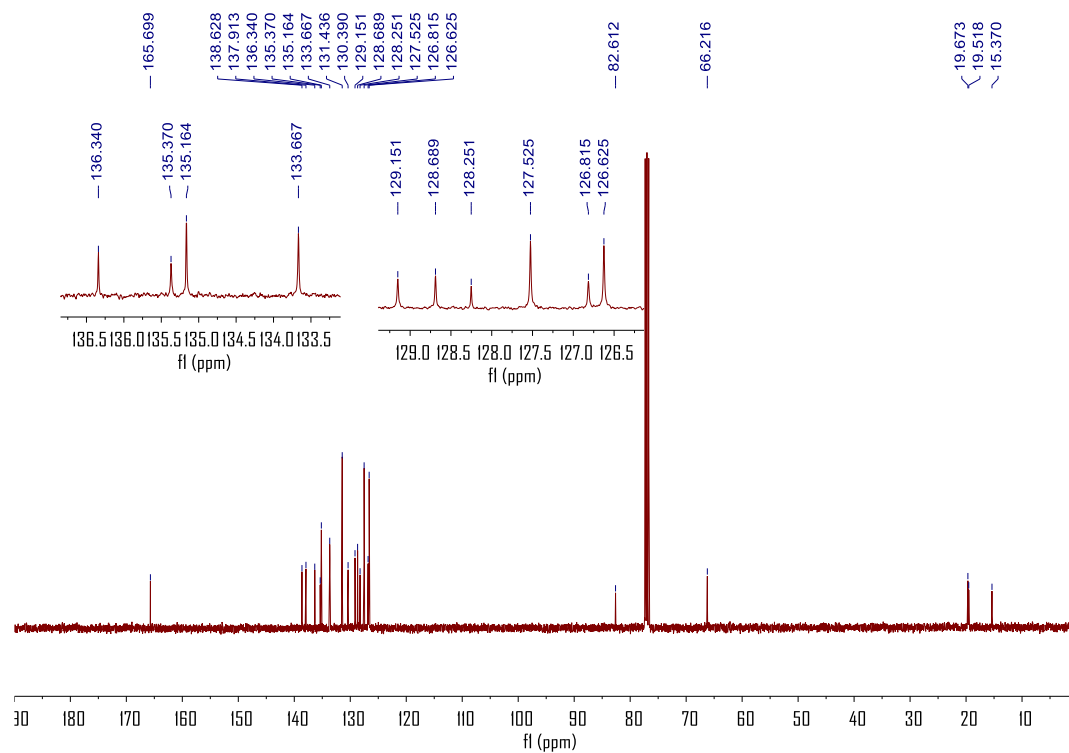

Figure S19.  $^1\text{H}$  NMR of C12

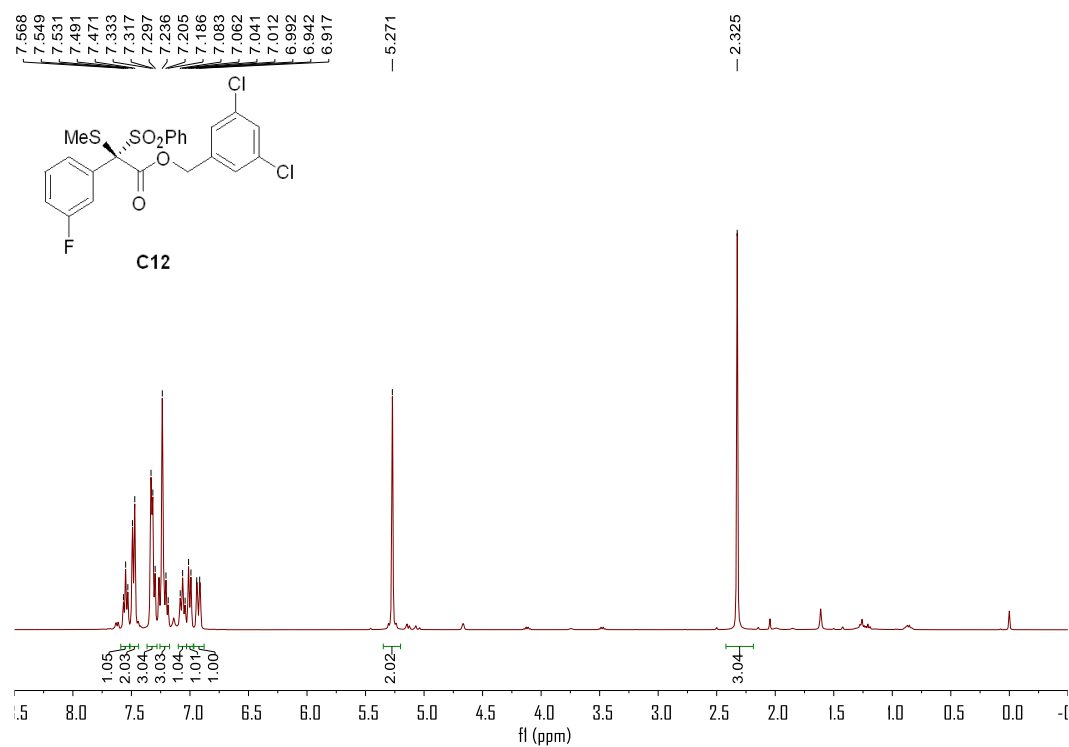

Figure S20.  $^{13}\text{C}\{^1\text{H}\}$  NMR of C12

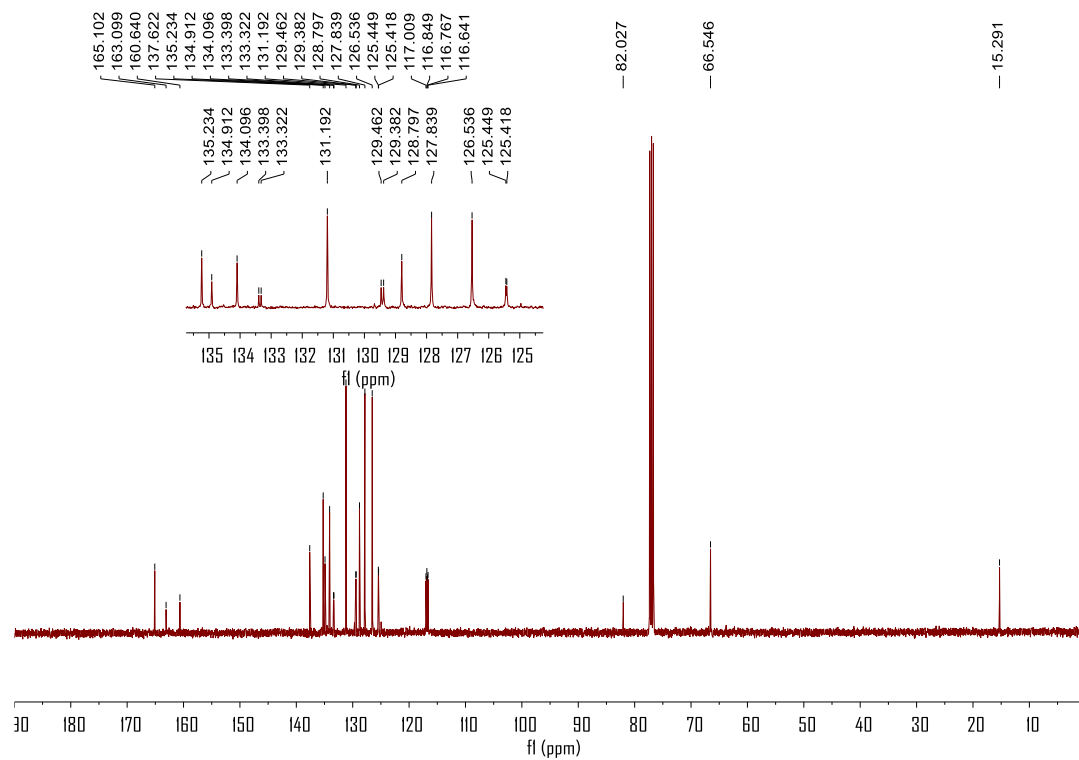

Figure S21.  $^{19}\text{F}$  NMR of C12

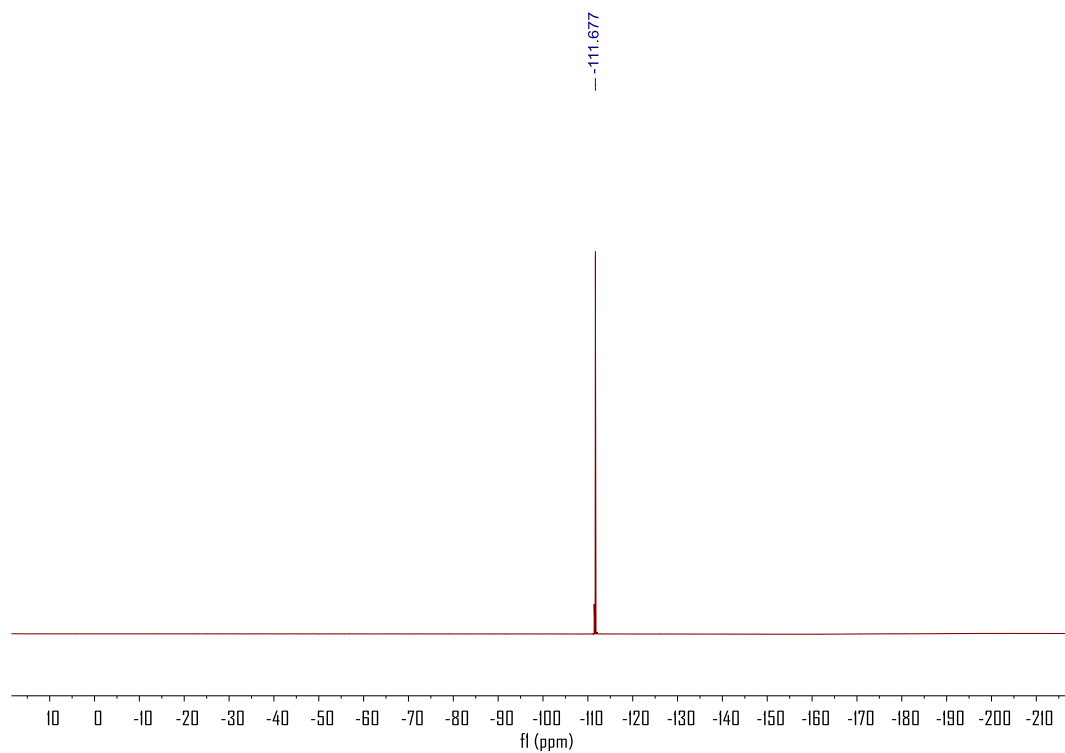

Figure S22.  $^1\text{H}$  NMR of C13

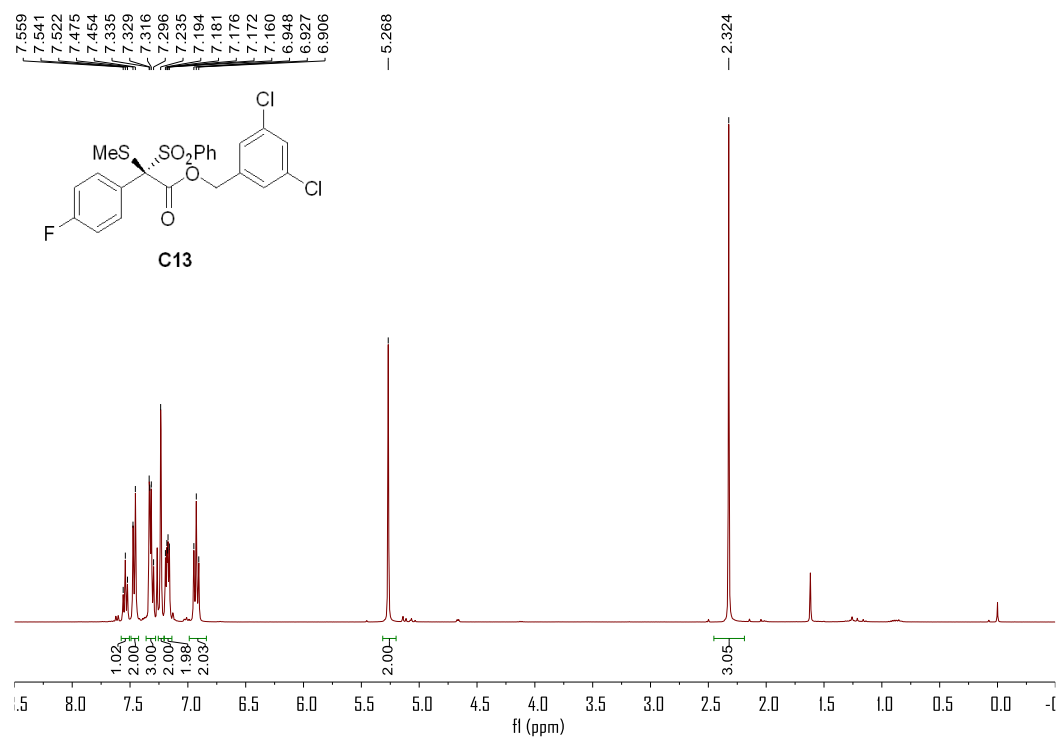

Figure S23.  $^{13}\text{C}\{^1\text{H}\}$  NMR of C13

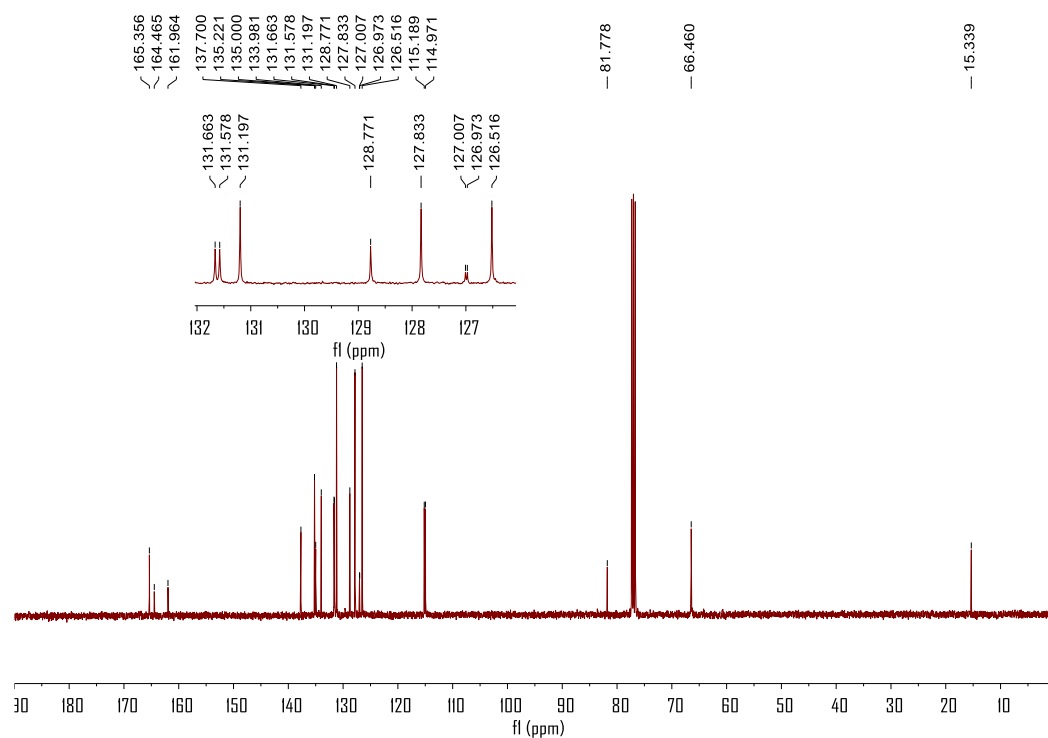

Figure S24.  $^{19}\text{F}$  NMR of C13

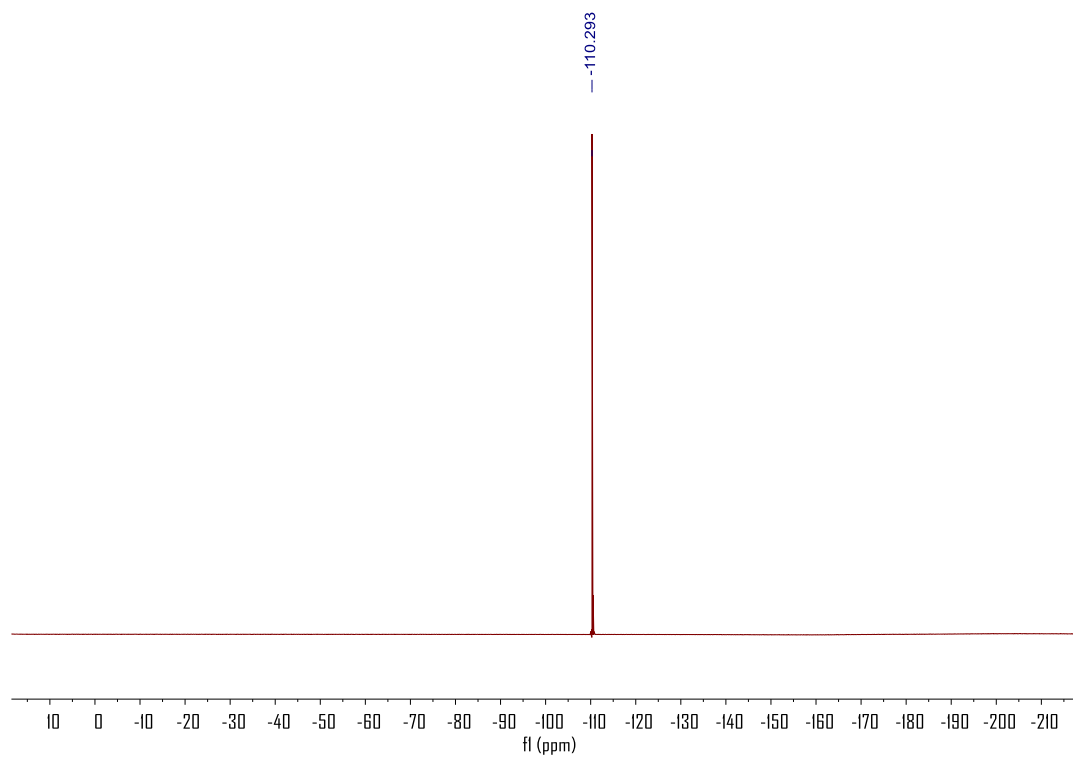

Figure S25.  $^1\text{H}$  NMR of C14

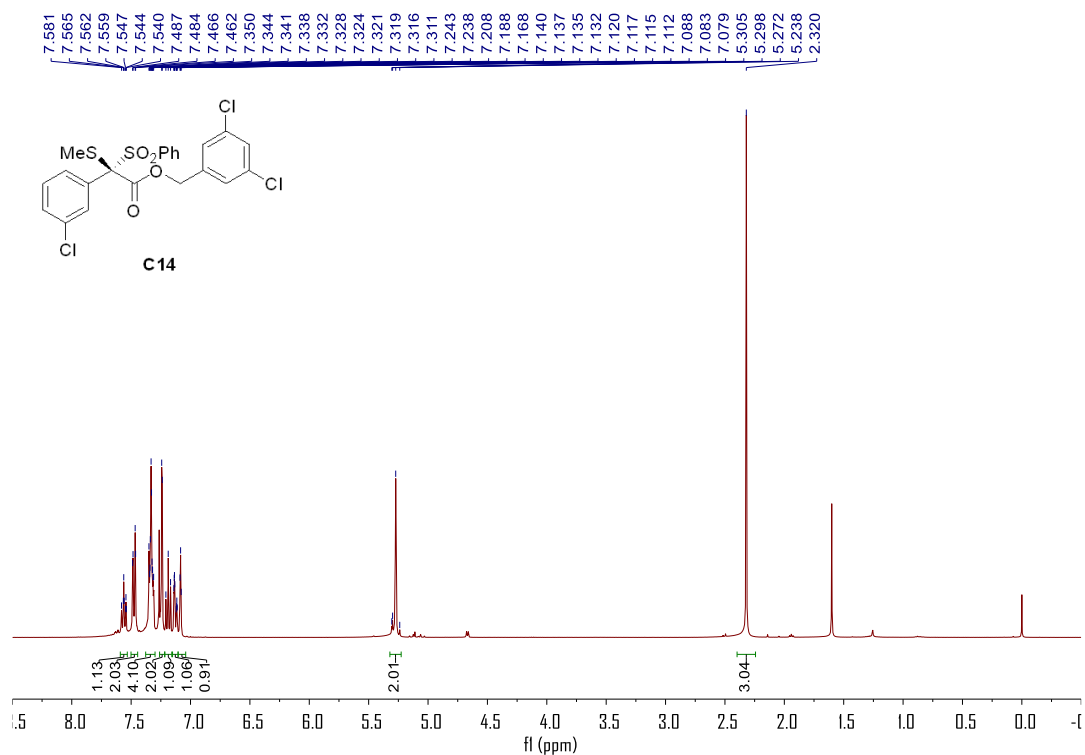

Figure S26.  $^{13}\text{C}\{^1\text{H}\}$  NMR of C14

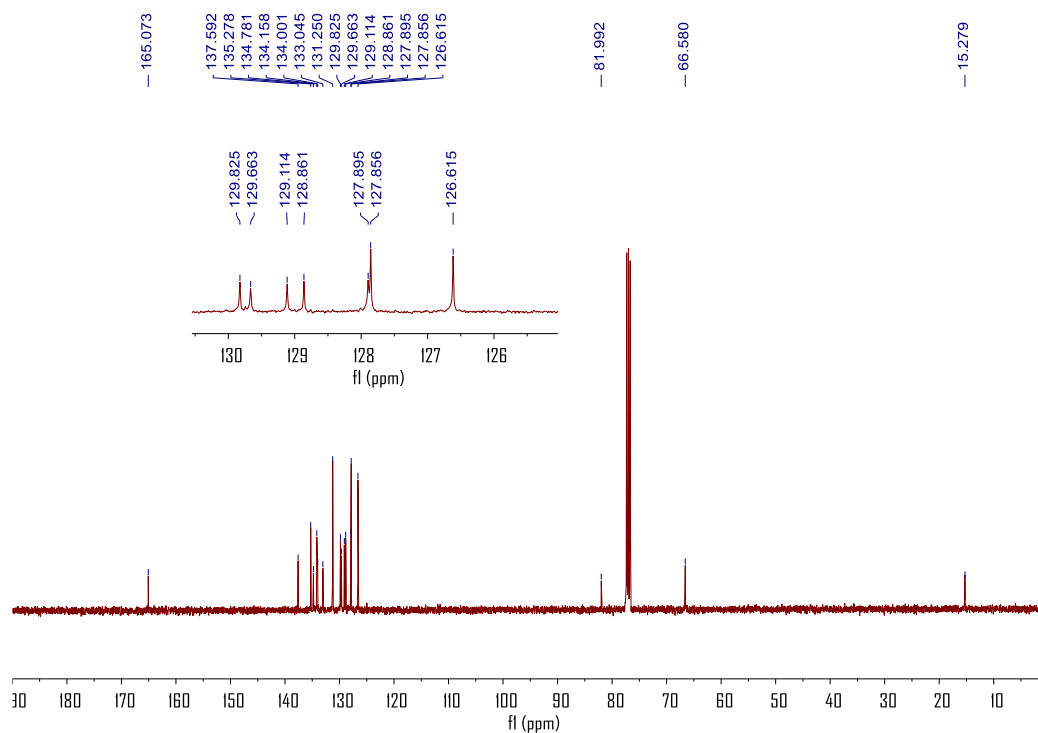

Figure S27.  $^1\text{H}$  NMR of C15

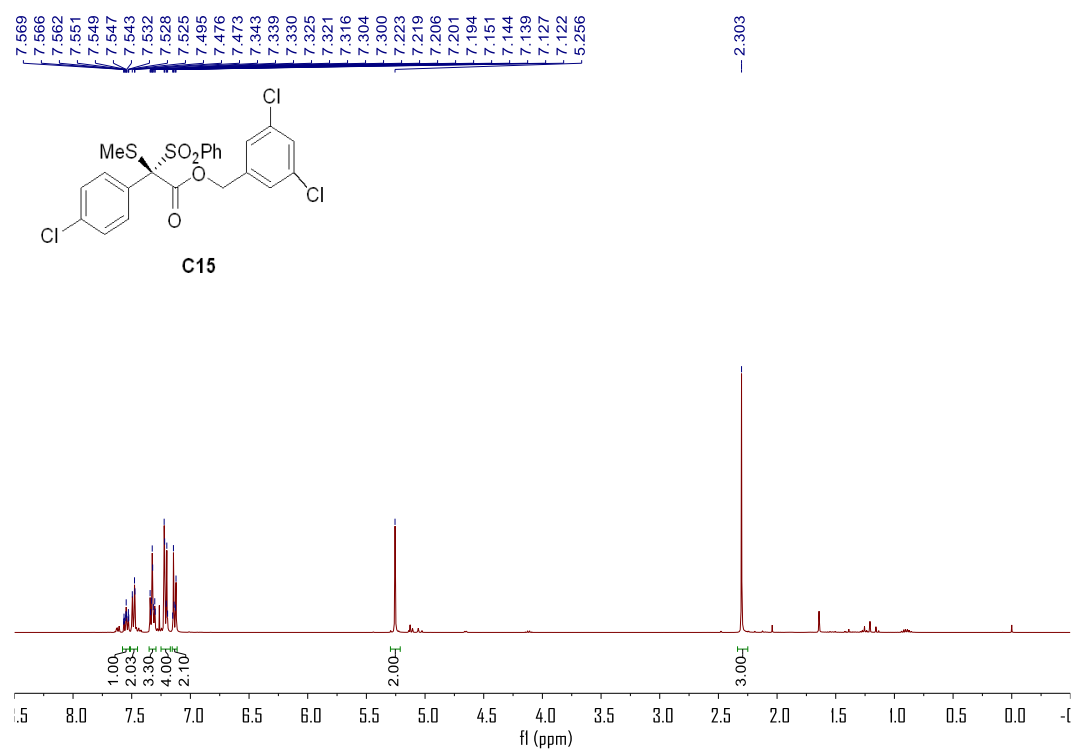

Figure S28.  $^{13}\text{C}\{^1\text{H}\}$  NMR of C15

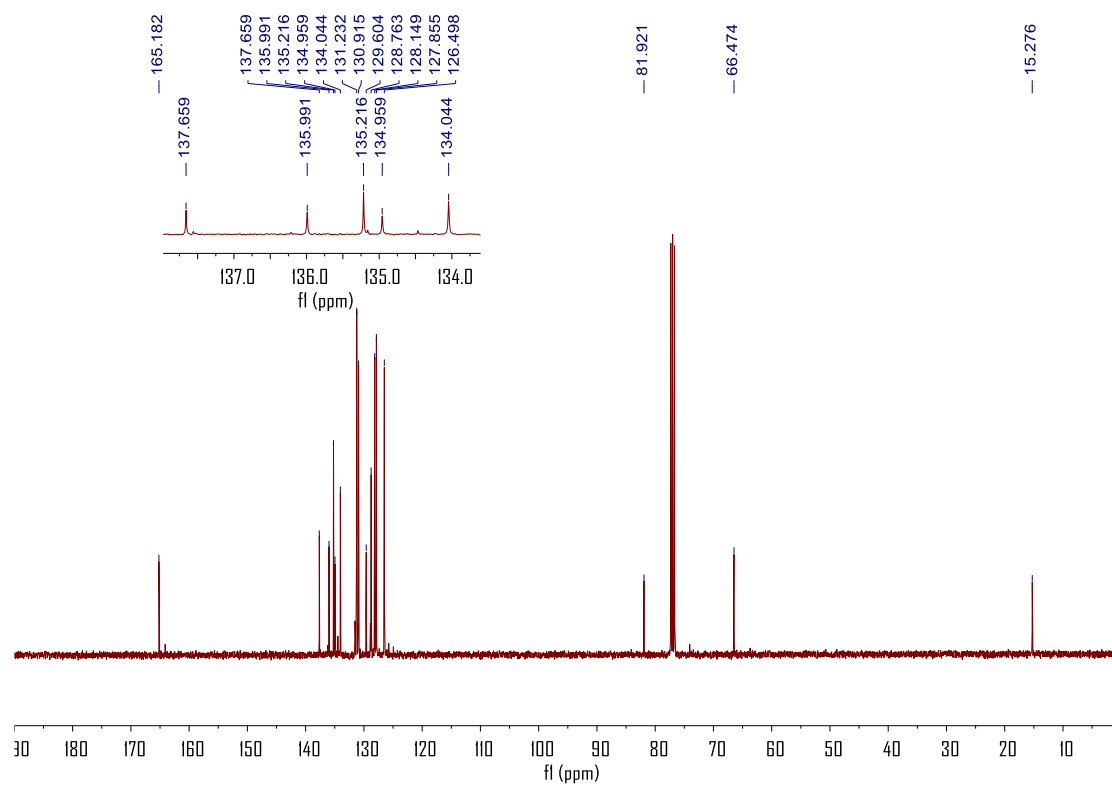

Figure S29. <sup>1</sup>H NMR of C16

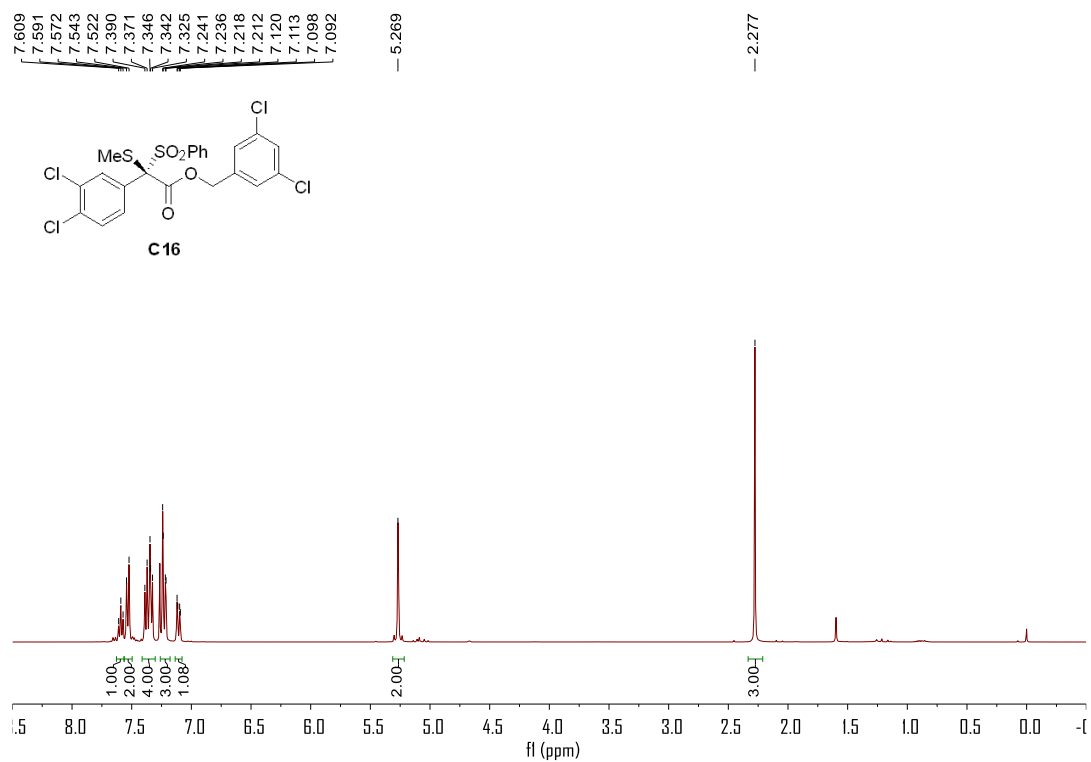

Figure S30. <sup>13</sup>C{<sup>1</sup>H} NMR of C16

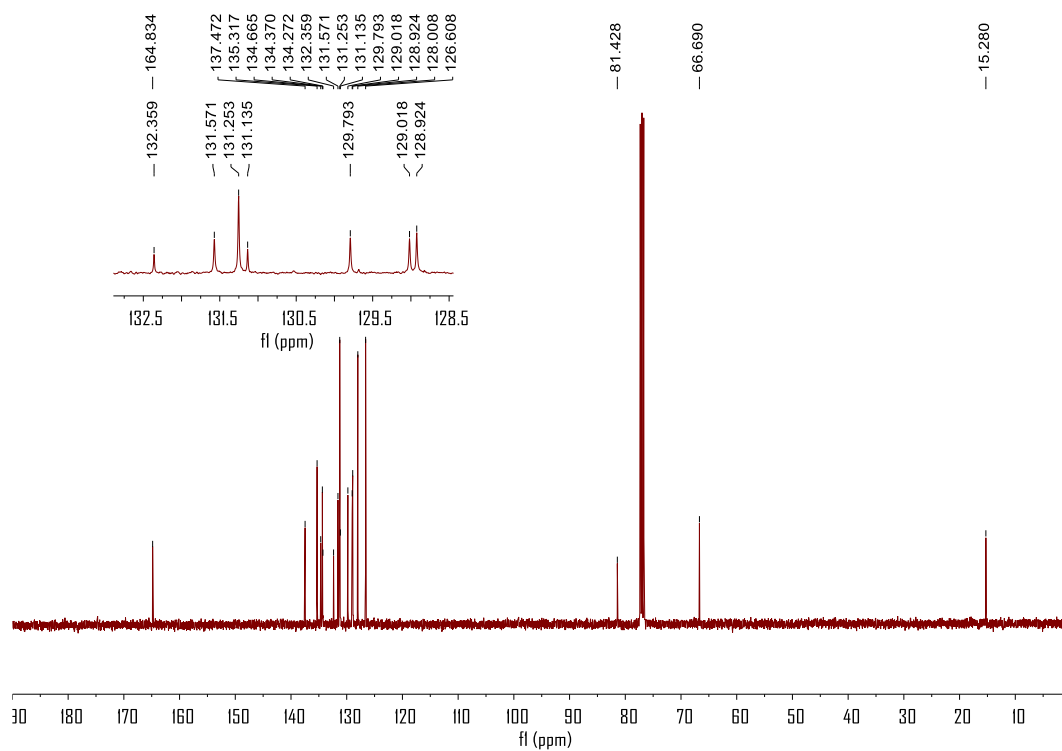



Figure S31.  $^1\text{H}$  NMR of C17

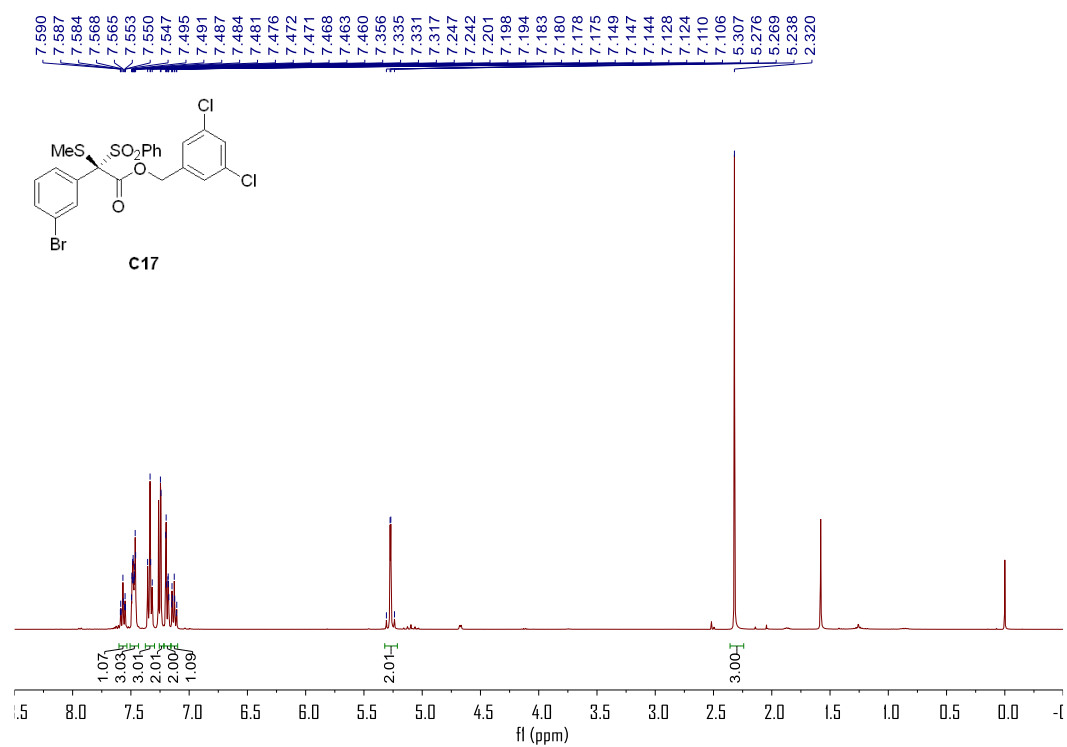

Figure S32.  $^{13}\text{C}\{^1\text{H}\}$  NMR of C17

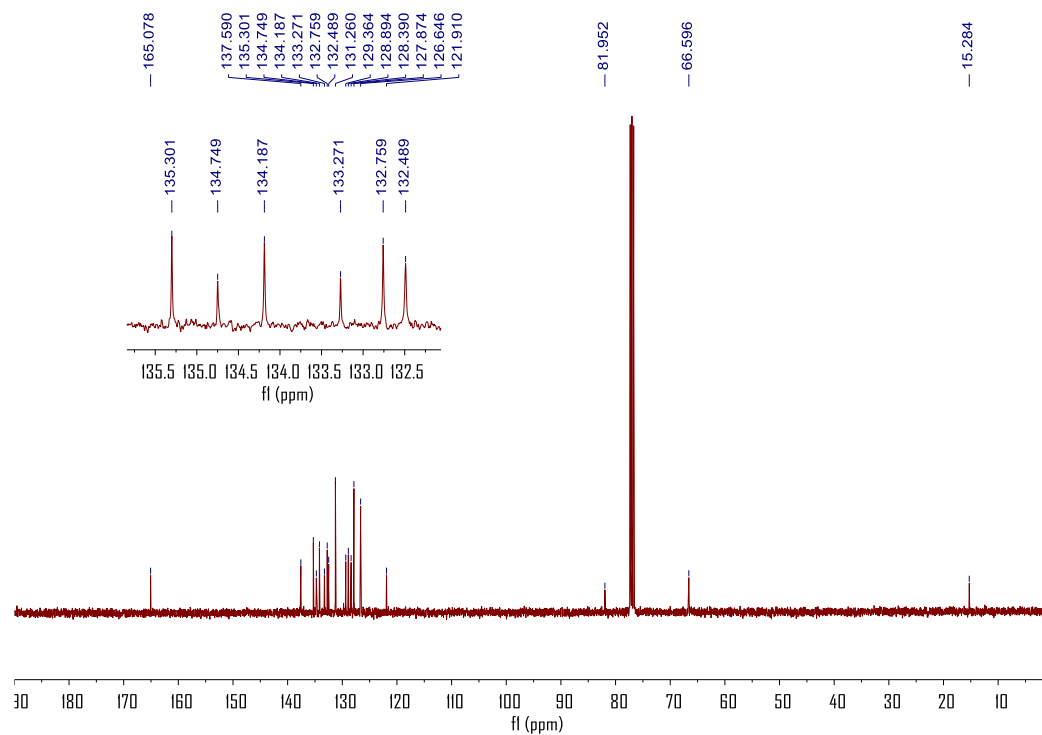

Figure S33.  $^1\text{H}$  NMR of C18

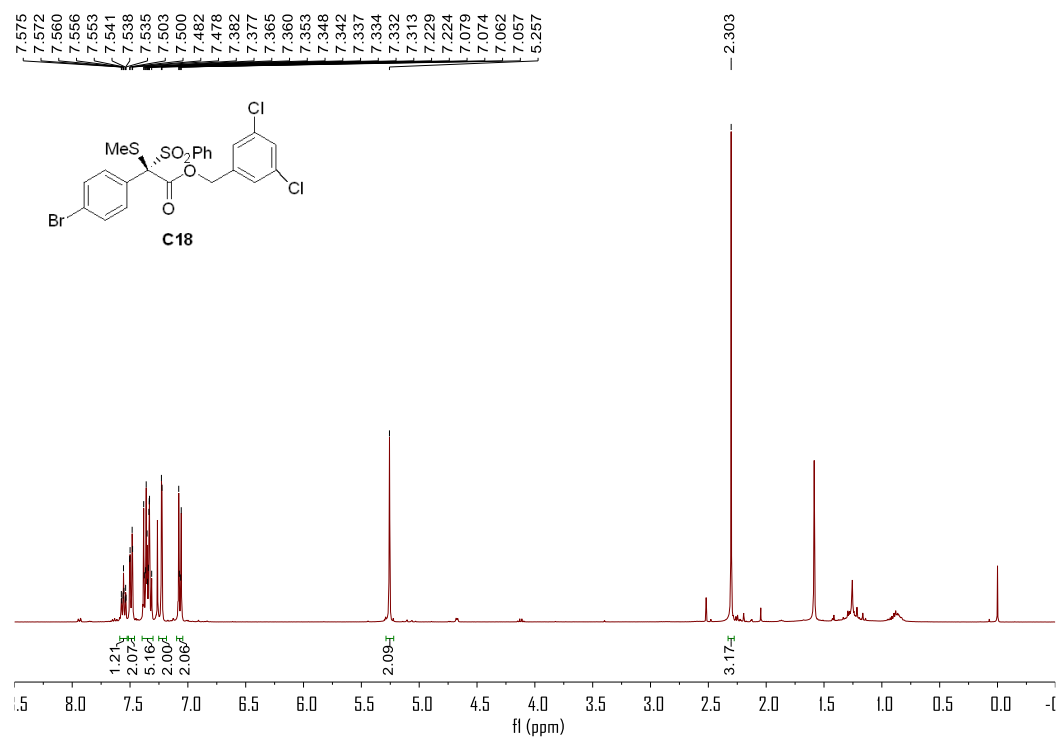

Figure S34.  $^{13}\text{C}\{^1\text{H}\}$  NMR of C18

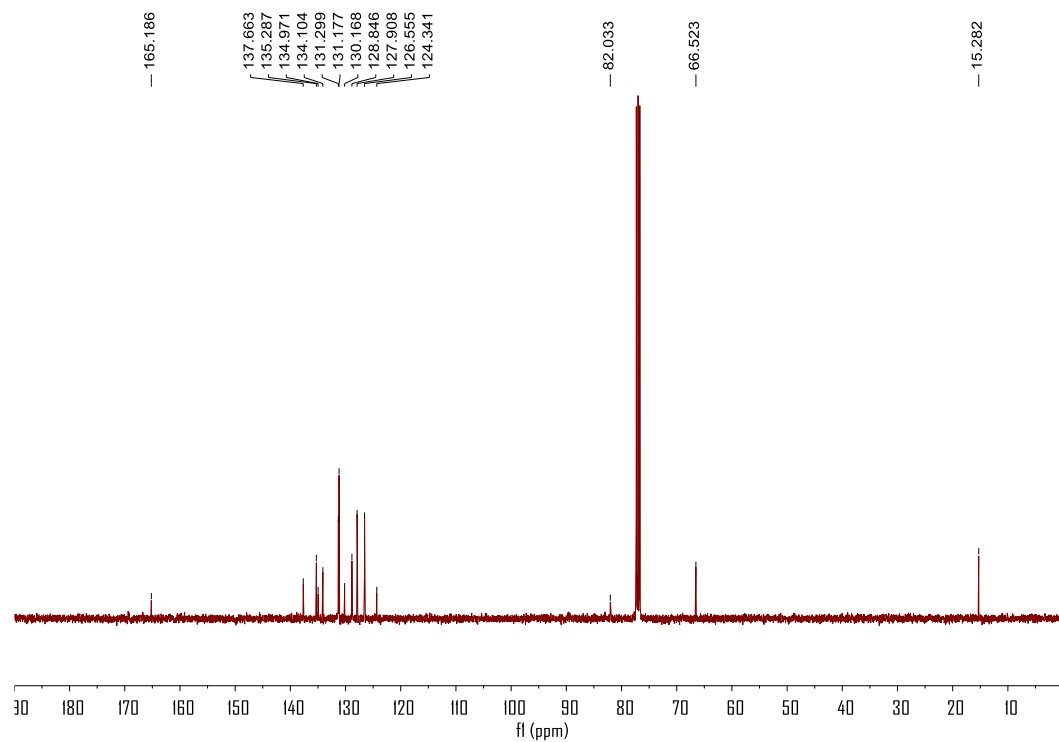

Figure S35.  $^1\text{H}$  NMR of C19

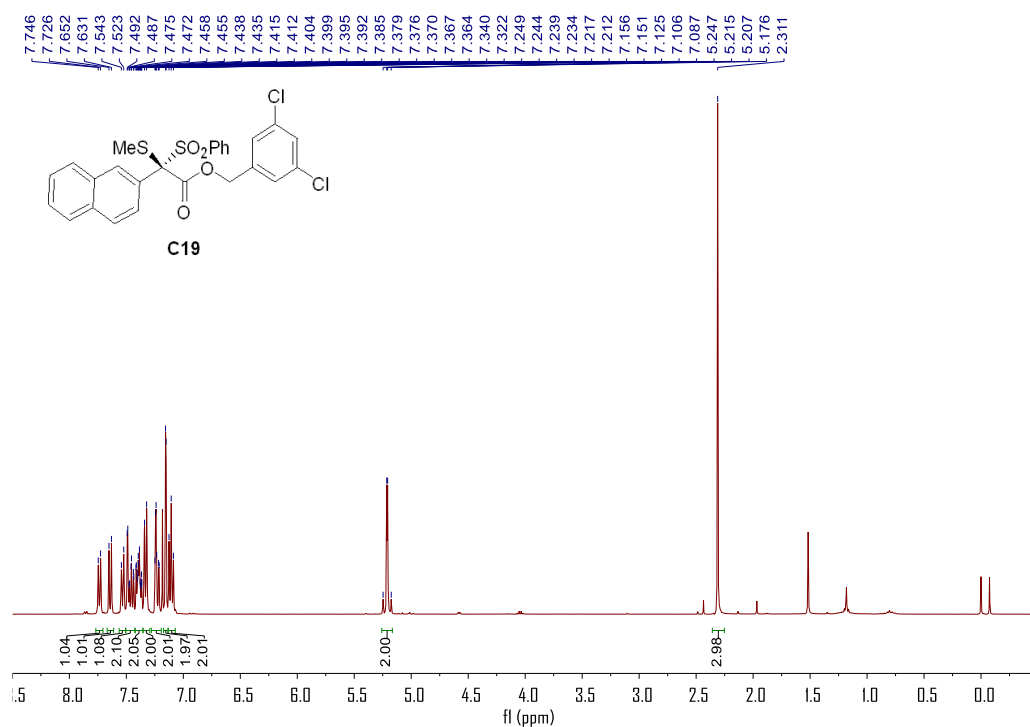

Figure S36.  $^{13}\text{C}\{^1\text{H}\}$  NMR of C19

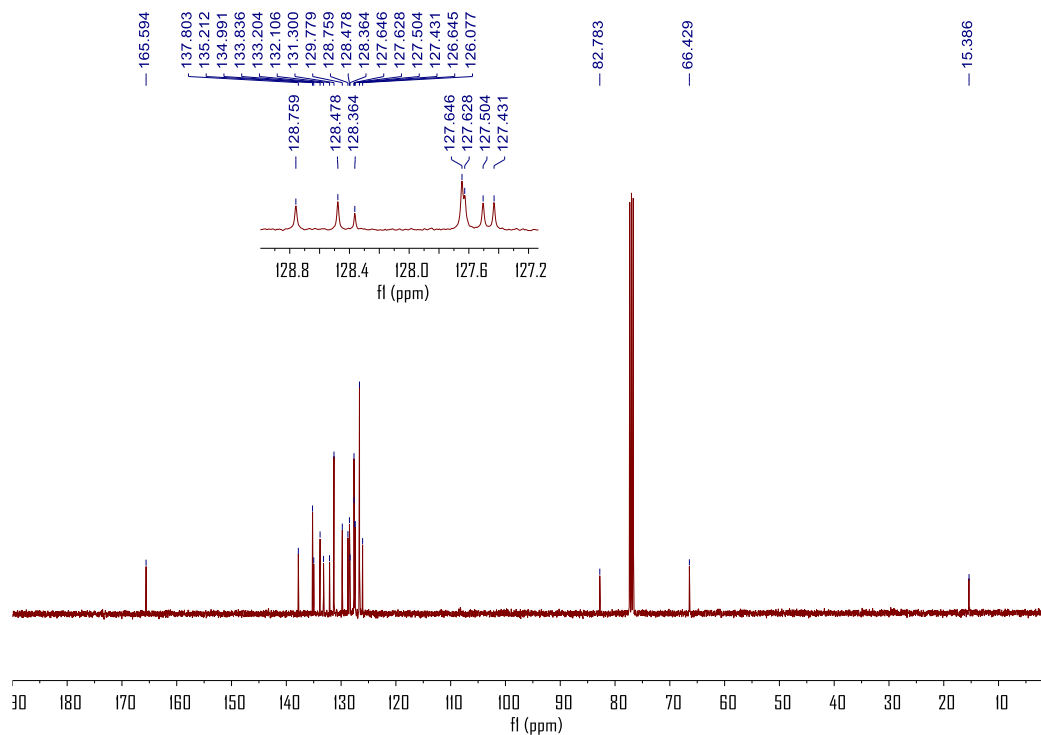

Figure S37.  $^1\text{H}$  NMR of C20

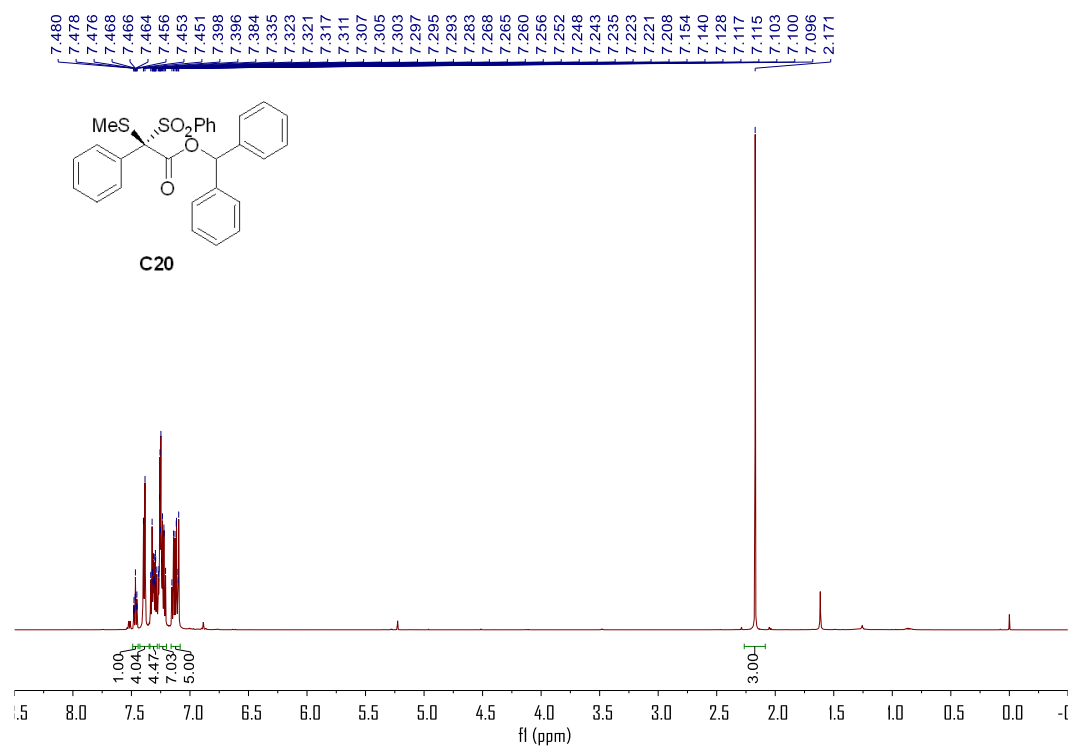

Figure S38.  $^{13}\text{C}\{^1\text{H}\}$  NMR of C20

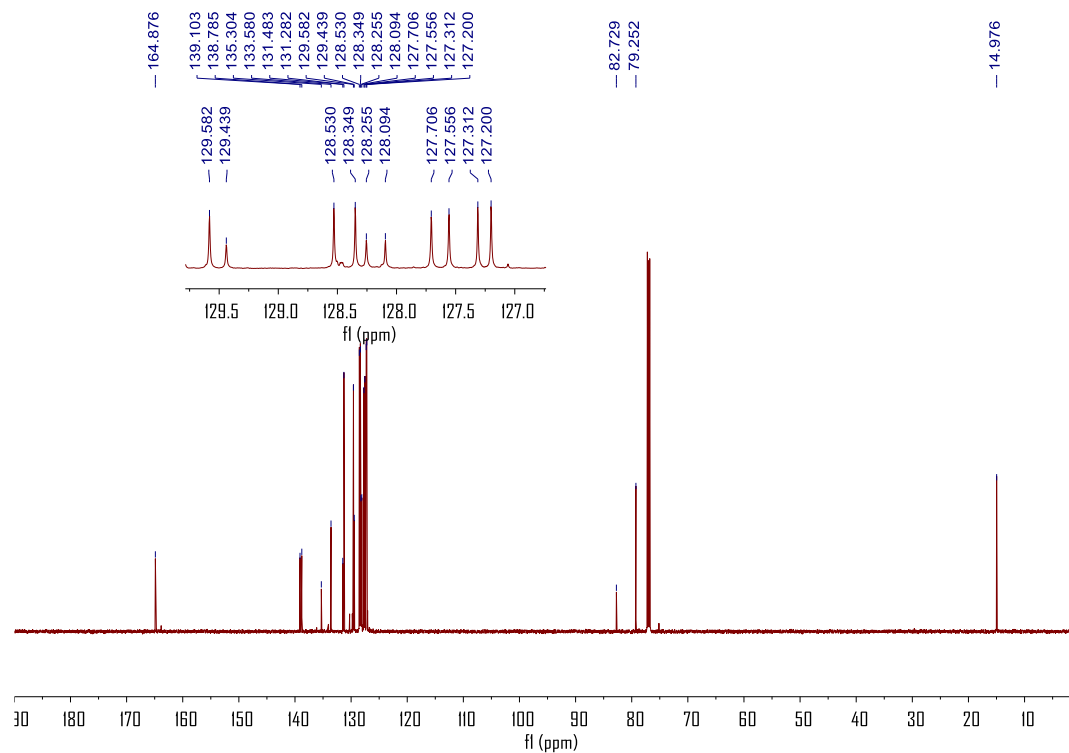

Figure S39. <sup>1</sup>H NMR of C21

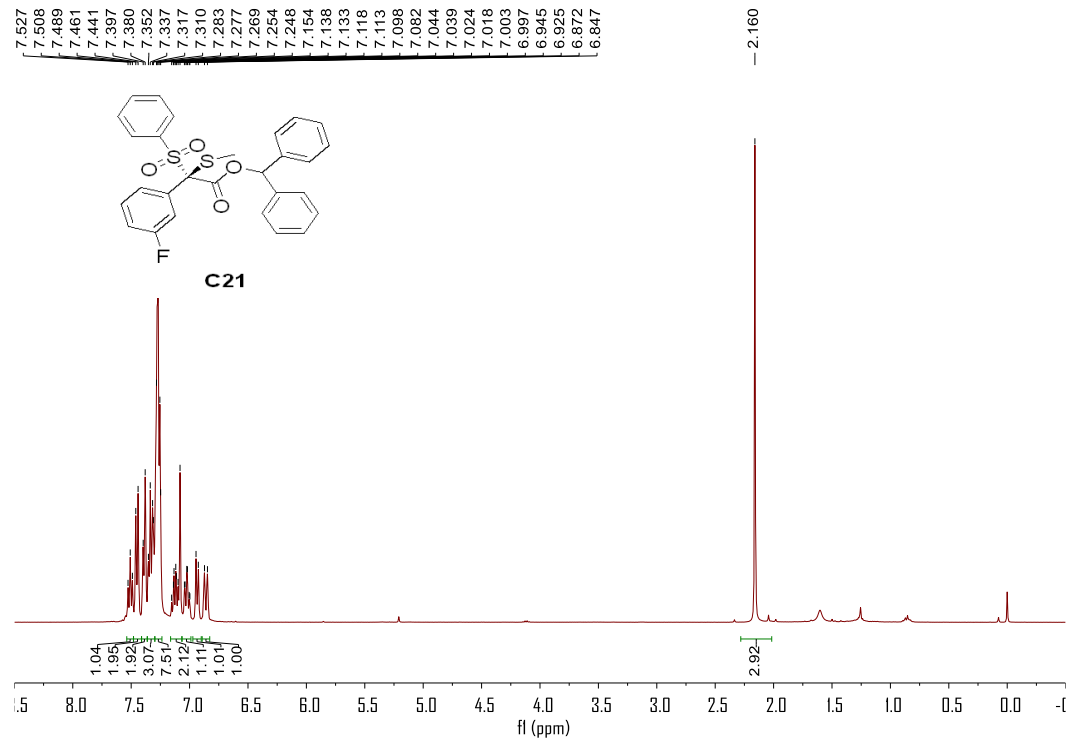

Figure S40. <sup>13</sup>C{<sup>1</sup>H} NMR of C21

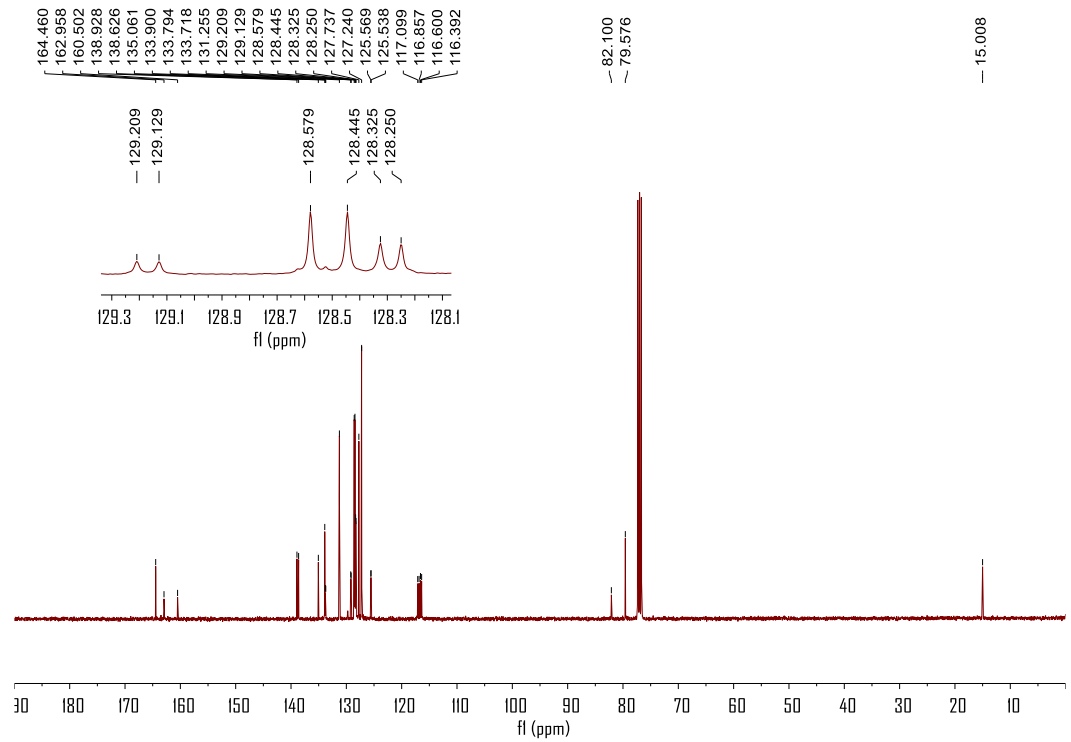

Figure S41.  $^{19}\text{F}$  NMR of C21

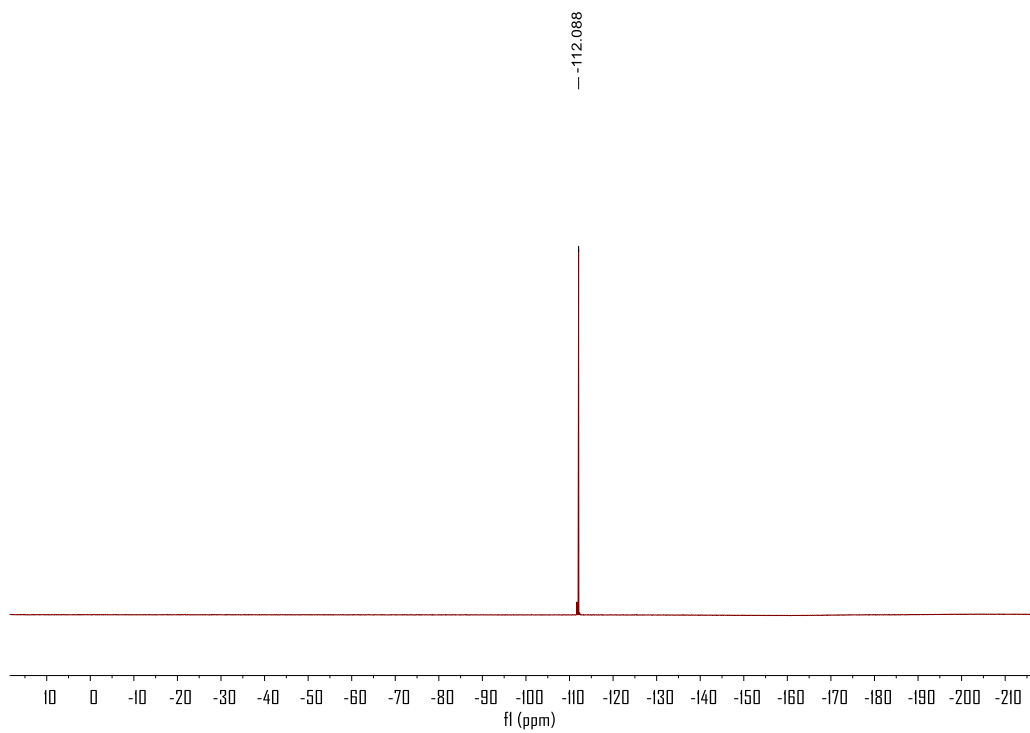

Figure S42.  $^1\text{H}$  NMR of C22

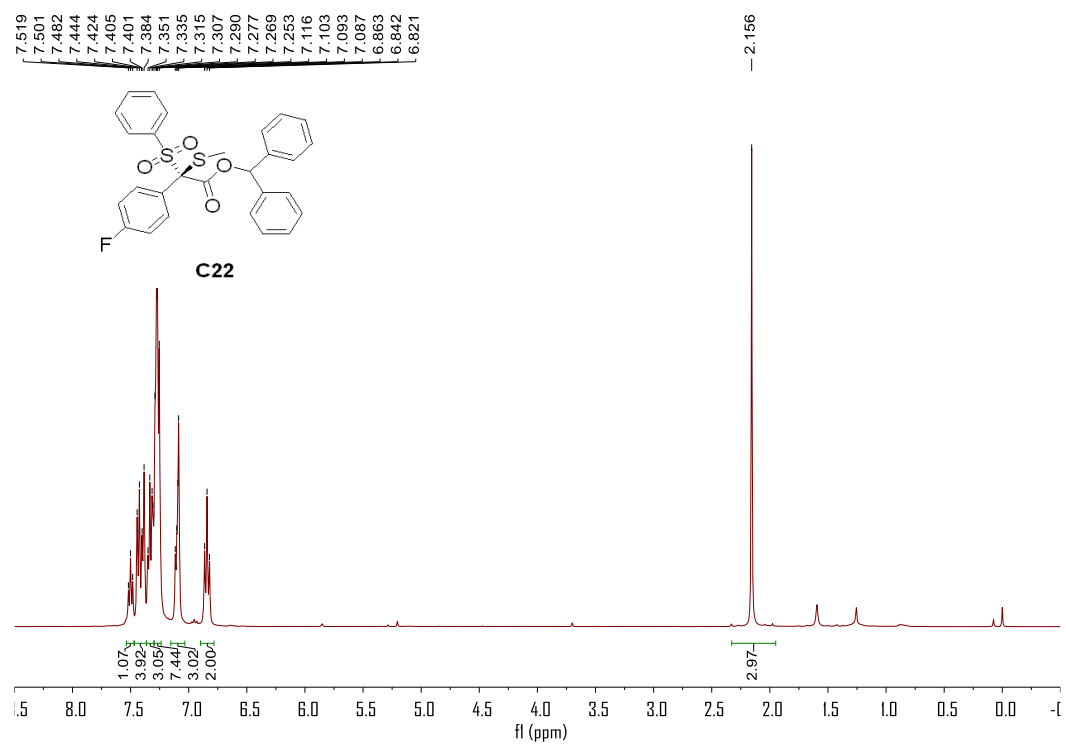

Figure S43.  $^{13}\text{C}\{^1\text{H}\}$  NMR of C22

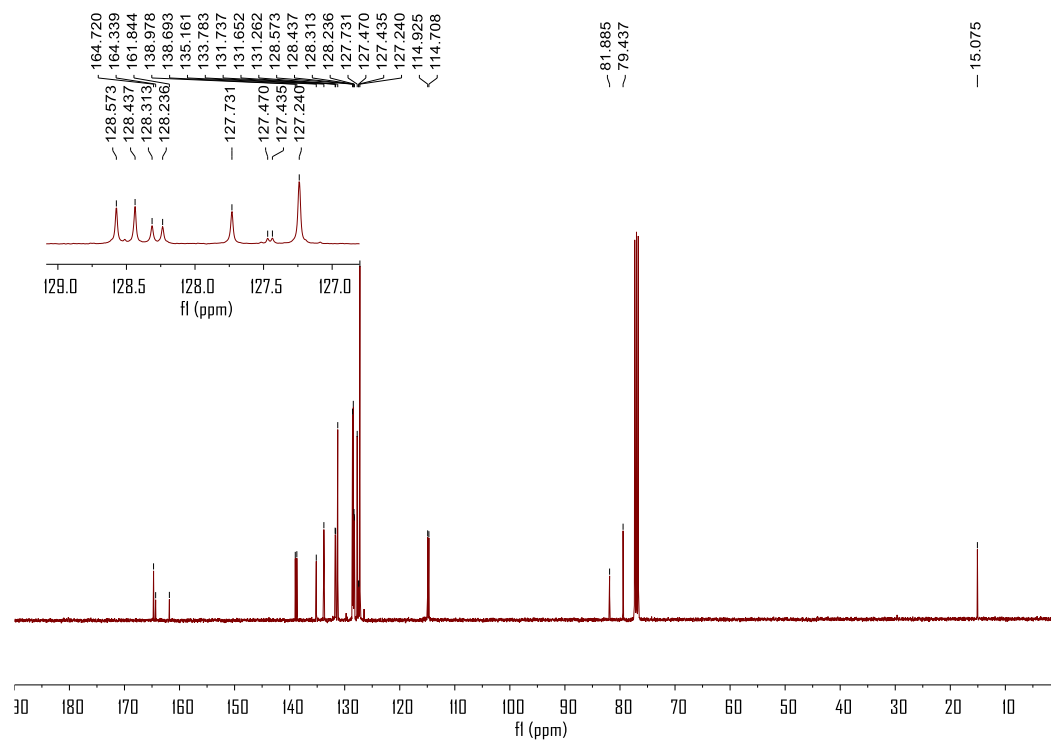

Figure S44.  $^{19}\text{F}$  NMR of C22

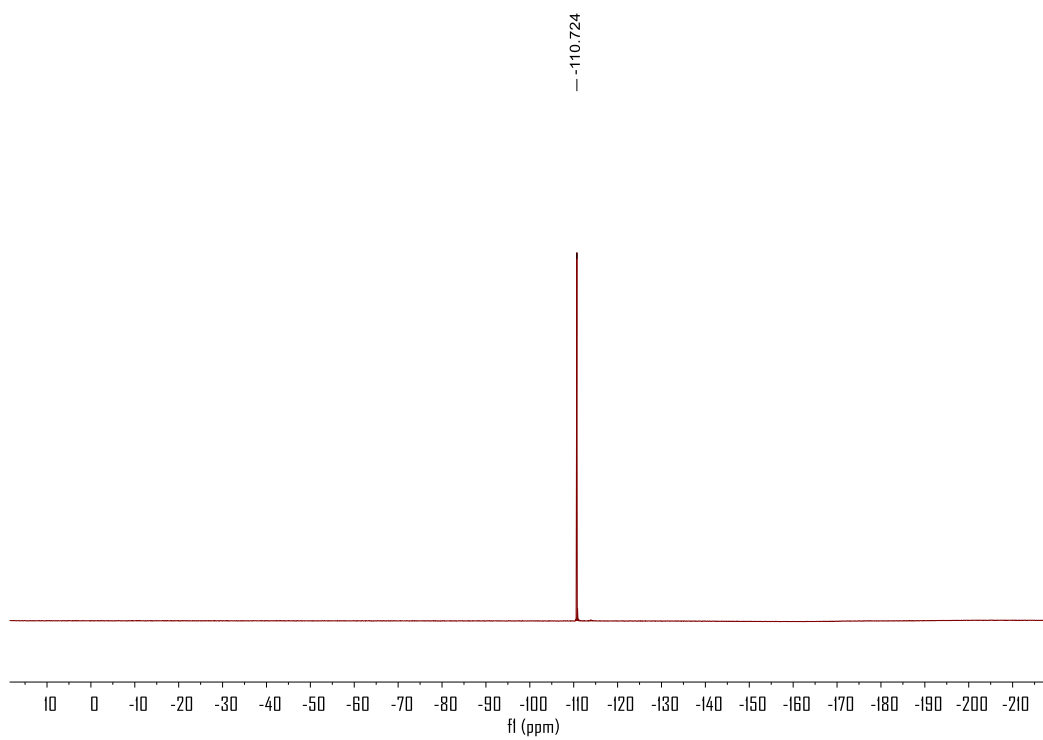



Figure S45.  $^1\text{H}$  NMR of C23

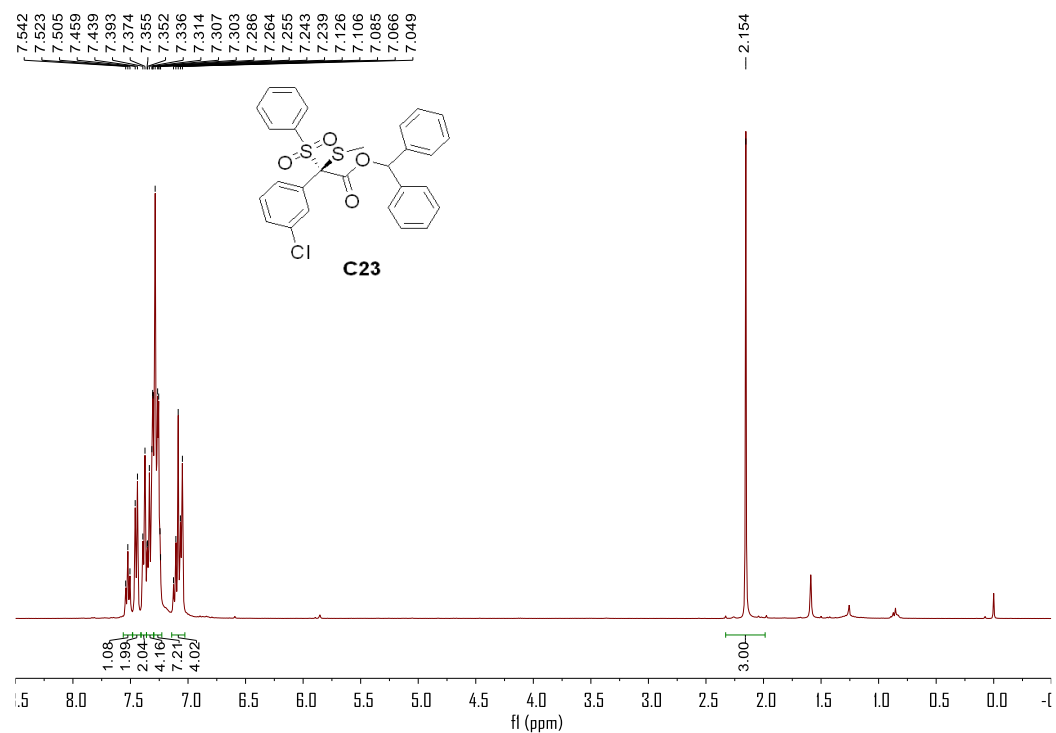

Figure S46.  $^{13}\text{C}\{^1\text{H}\}$  NMR of C23

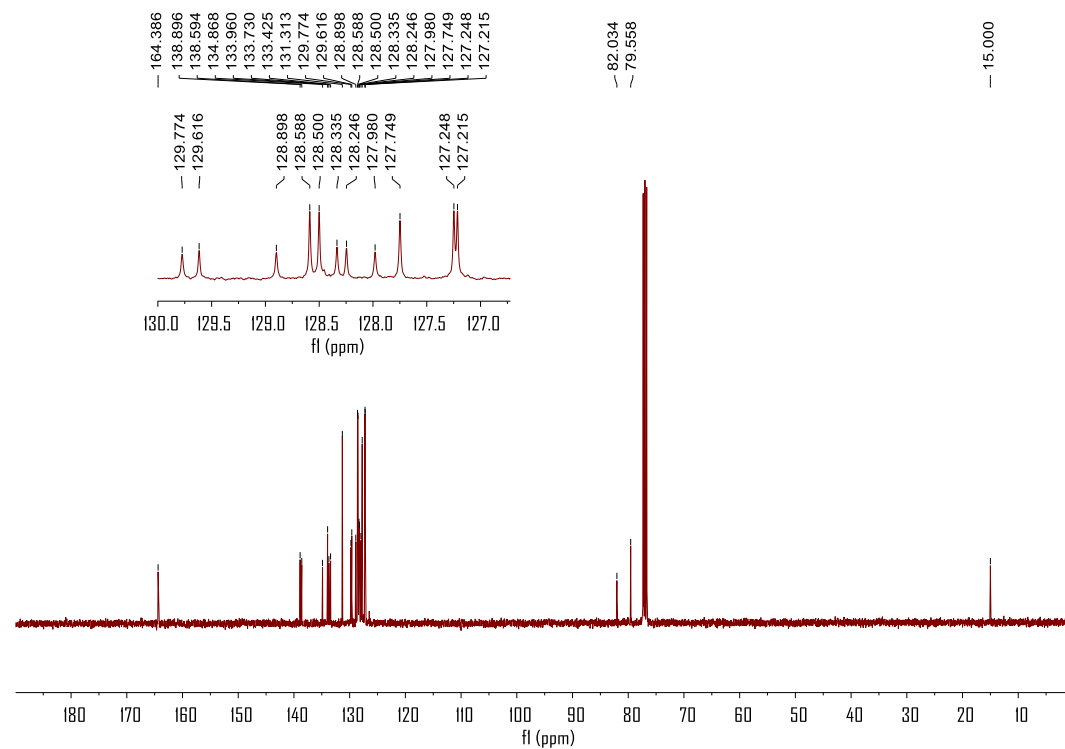

Figure S47.  $^1\text{H}$  NMR of C24

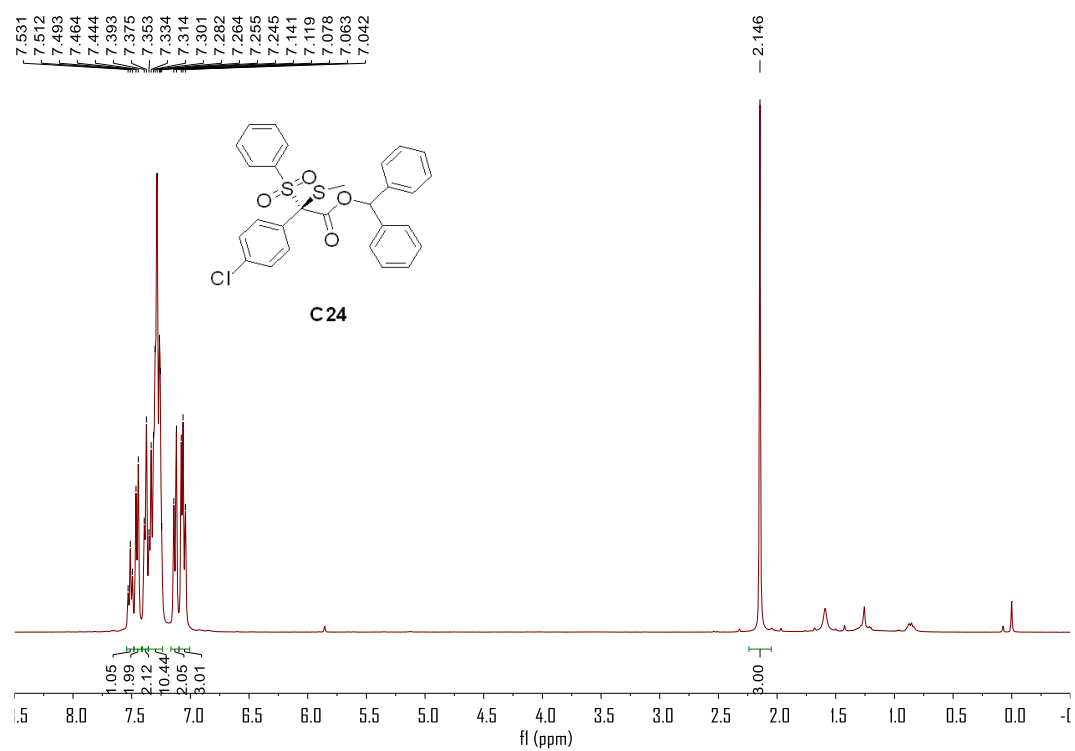

Figure S48.  $^{13}\text{C}\{^1\text{H}\}$  NMR of C24

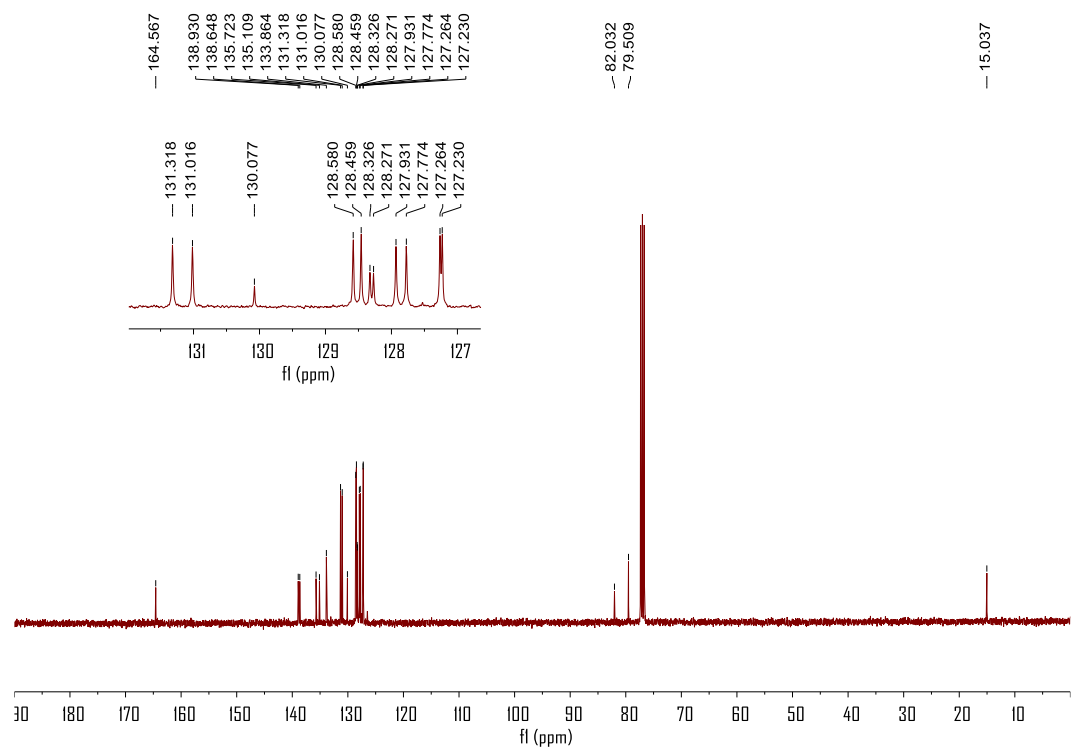

Figure S49.  $^1\text{H}$  NMR of C25

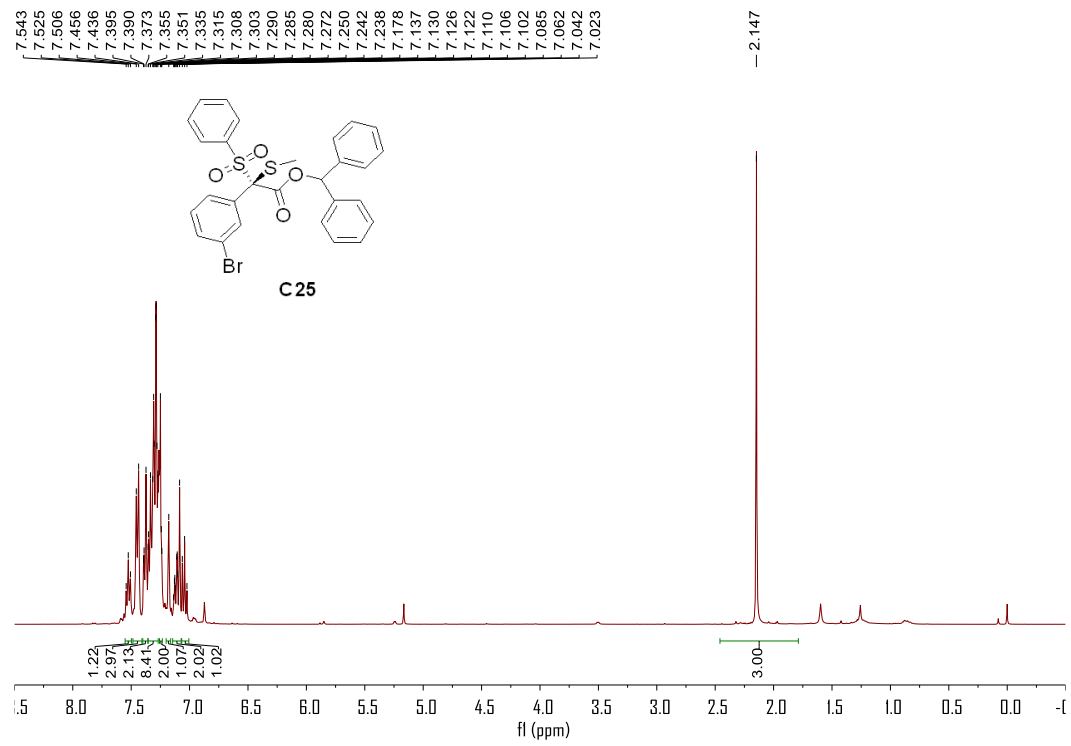

Figure S50.  $^{13}\text{C}\{^1\text{H}\}$  NMR of C25

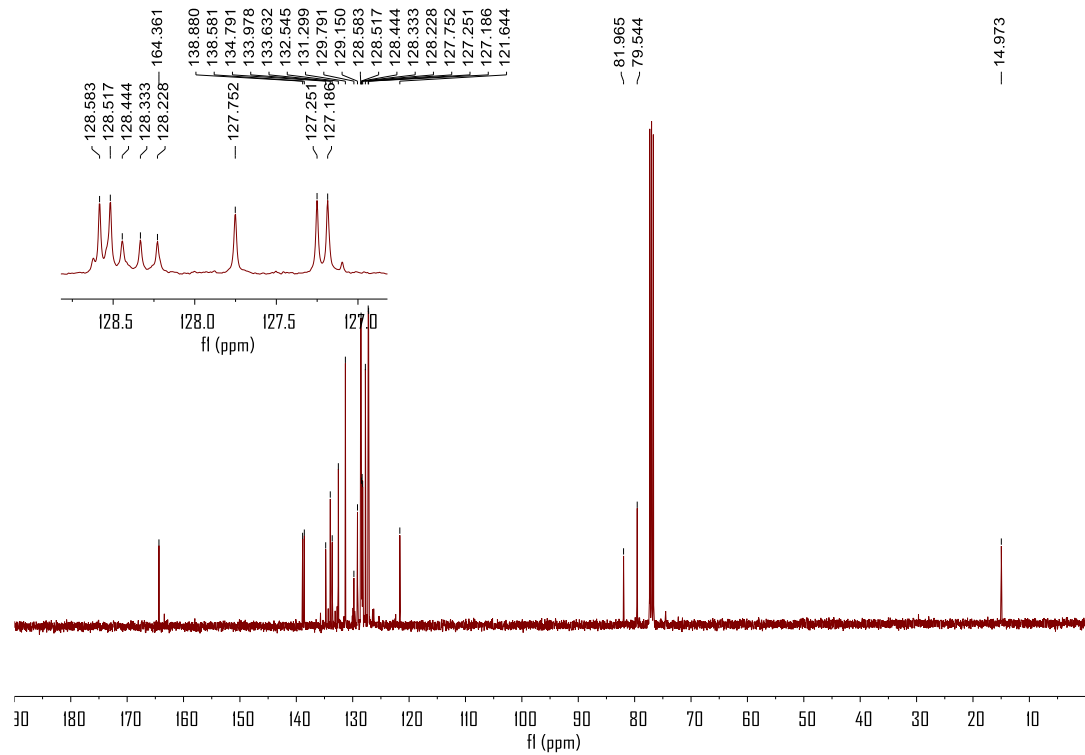

Figure S51.  $^1\text{H}$  NMR of C26

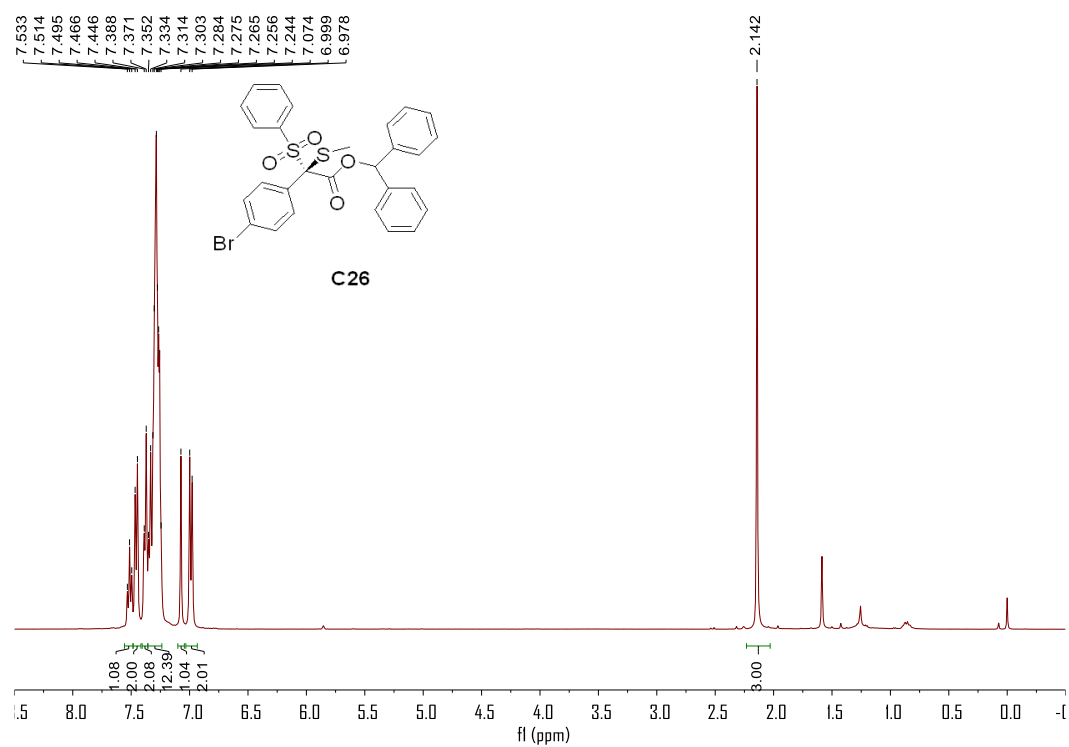

Figure S52.  $^{13}\text{C}\{^1\text{H}\}$  NMR of C26

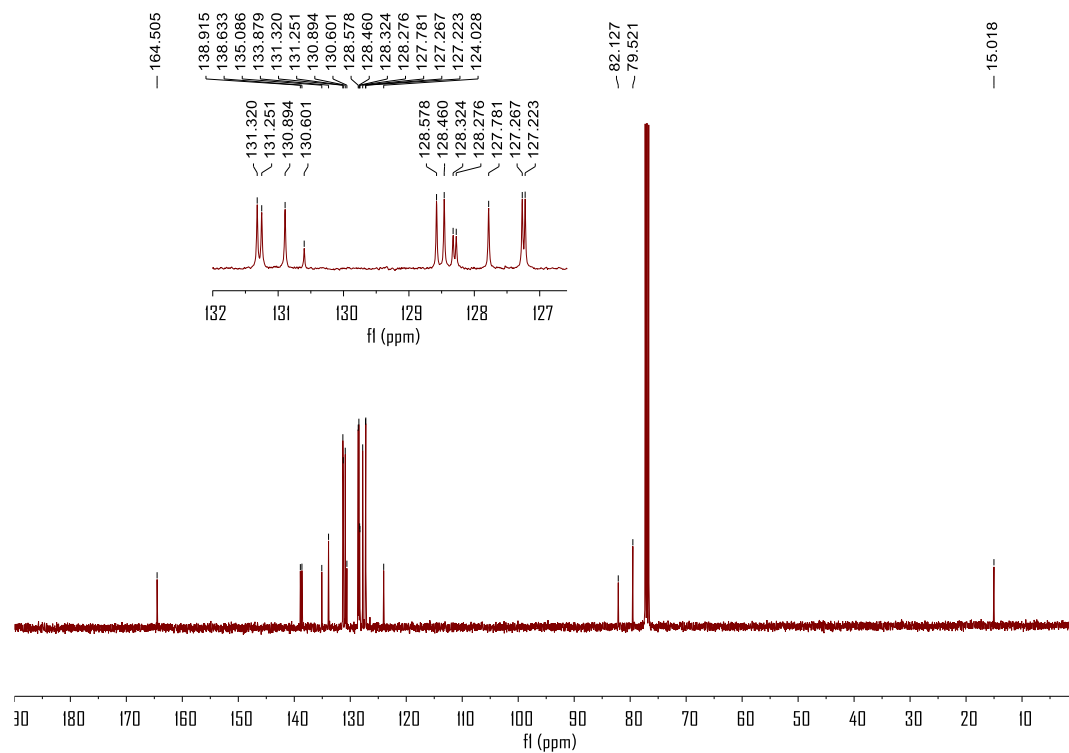

Figure S53.  $^1\text{H}$  NMR of C27

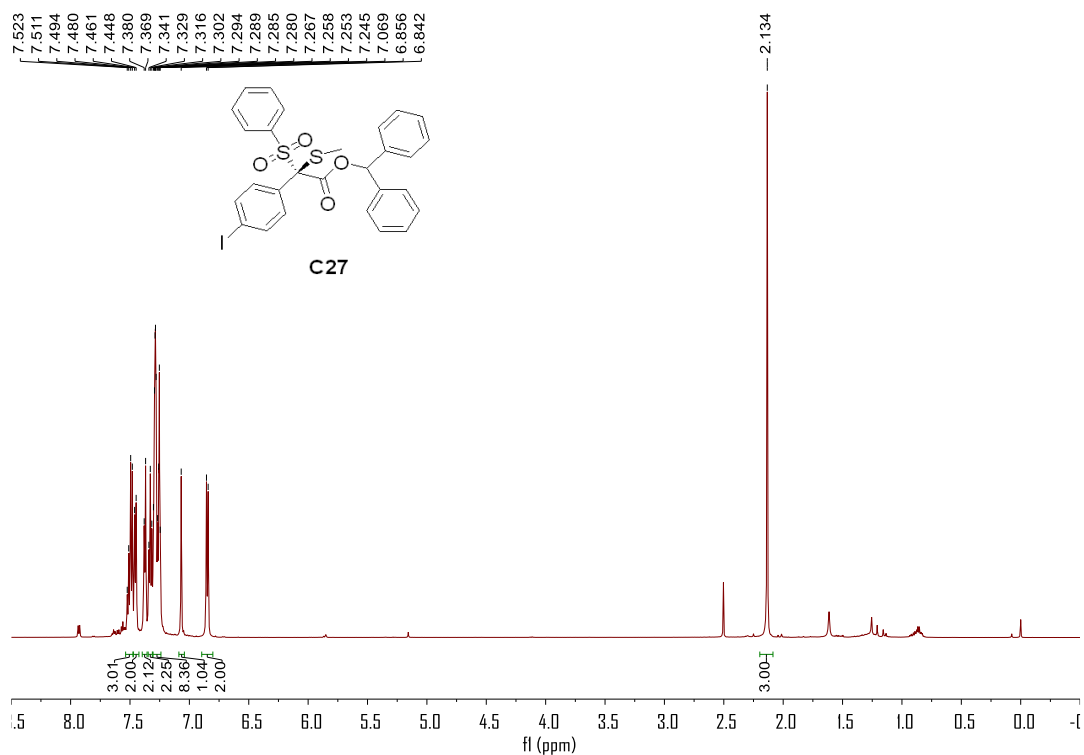

Figure S54.  $^{13}\text{C}\{^1\text{H}\}$  NMR of C27

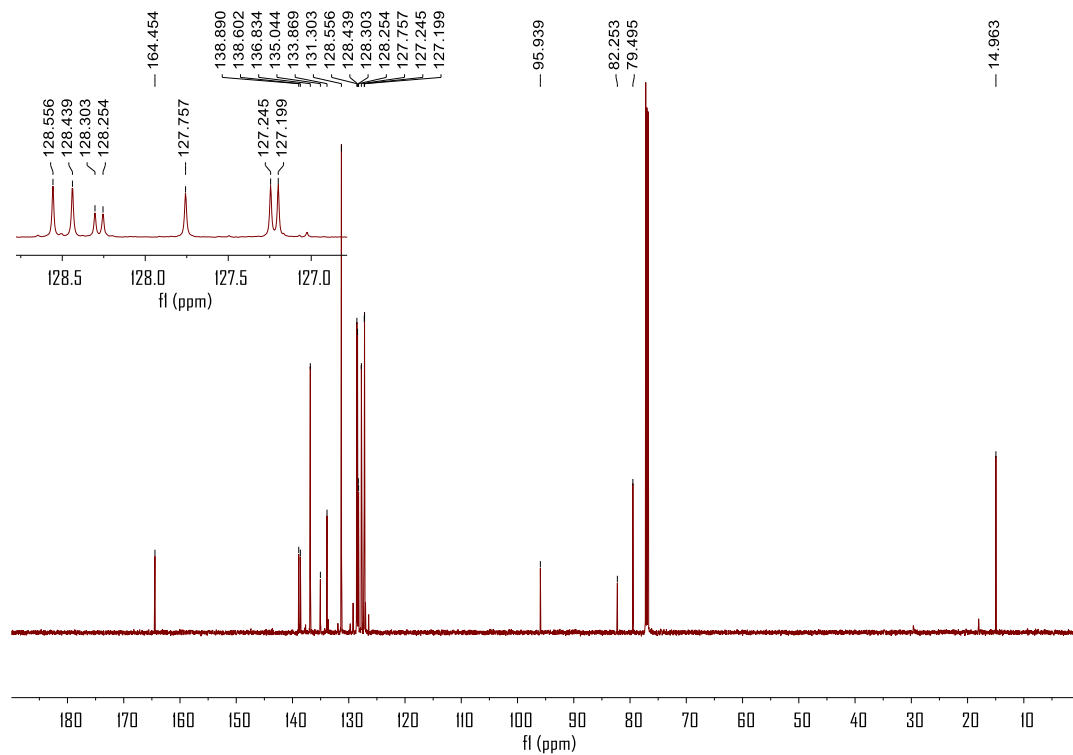

Figure S55. <sup>1</sup>H NMR of C28

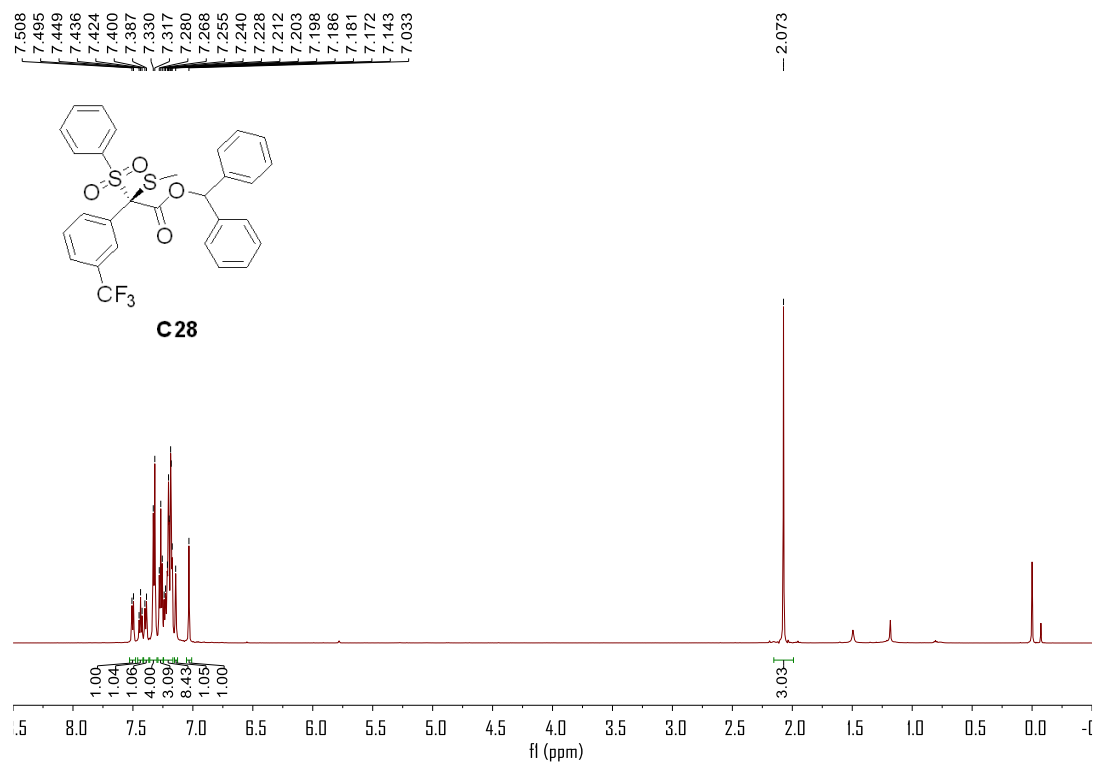

Figure S56. <sup>13</sup>C{<sup>1</sup>H} NMR of C28

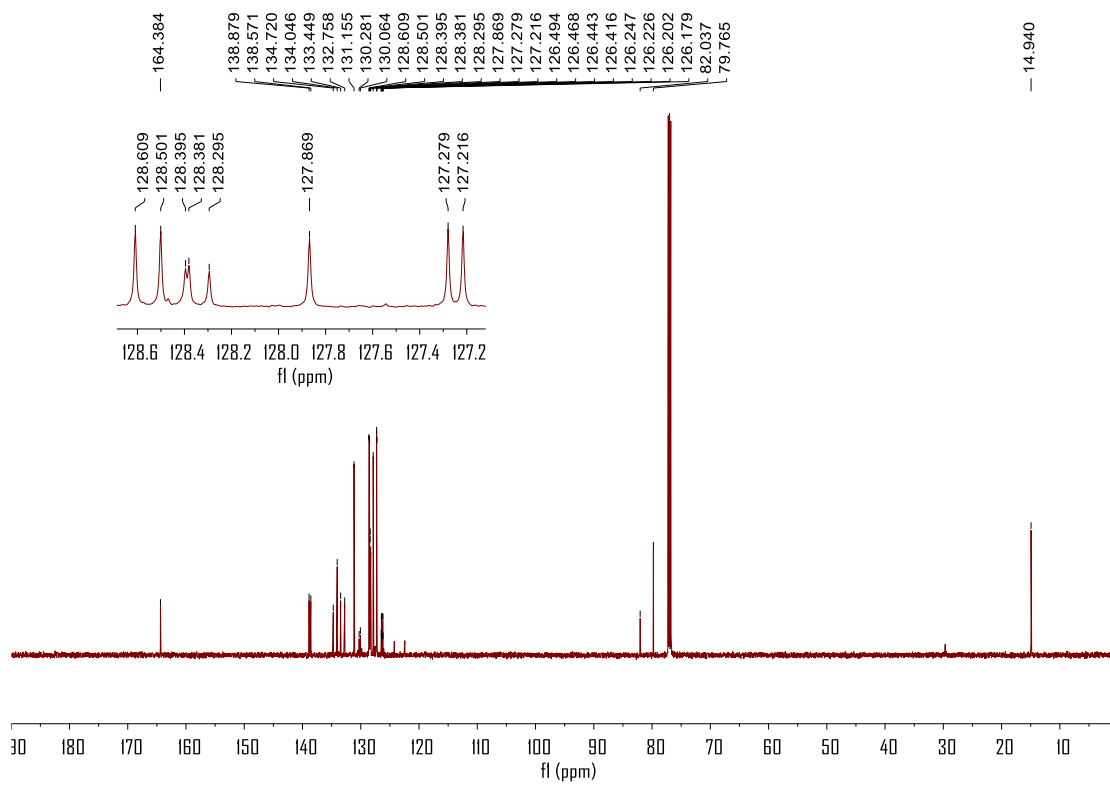

Figure S57.  $^{19}\text{F}$  NMR of C28

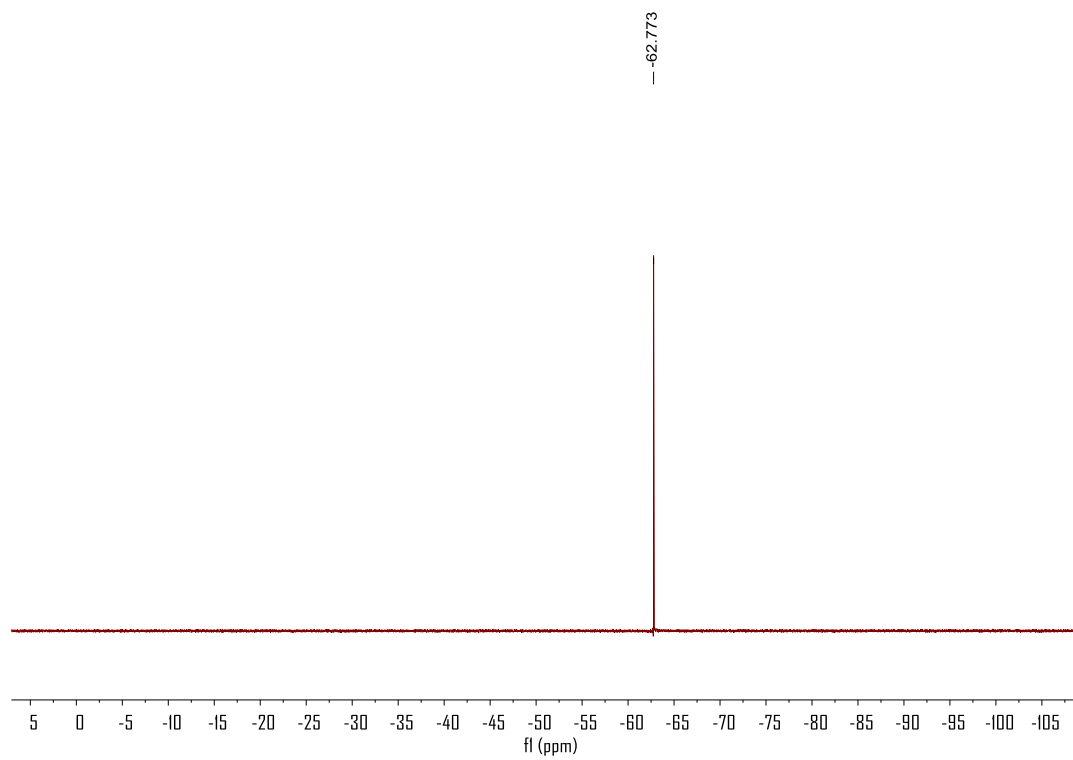

Figure S58.  $^1\text{H}$  NMR of C29

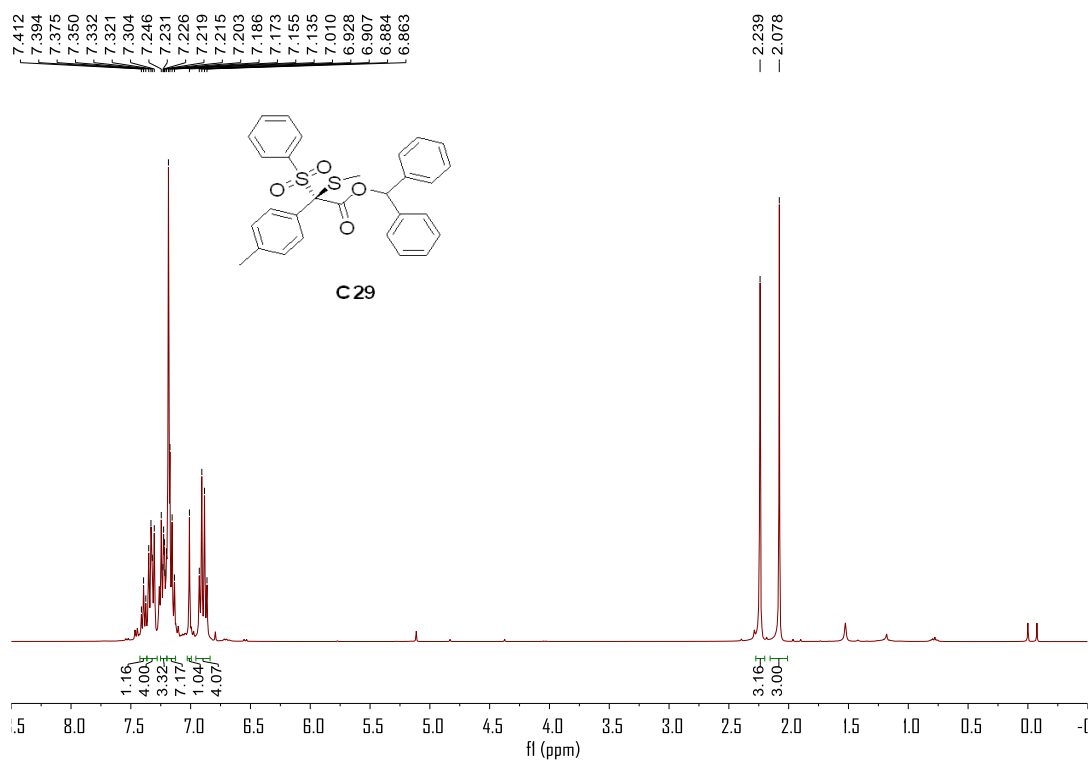

Figure S59.  $^{13}\text{C}\{^1\text{H}\}$  NMR of C29

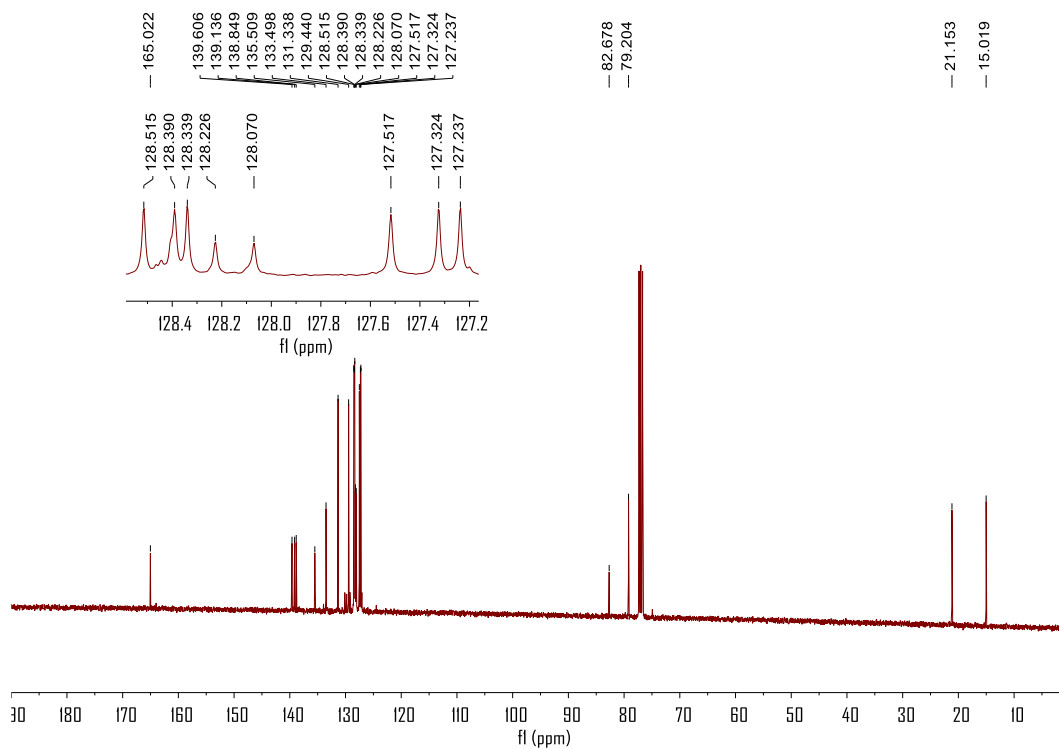



Figure S60.  $^1\text{H}$  NMR of C30

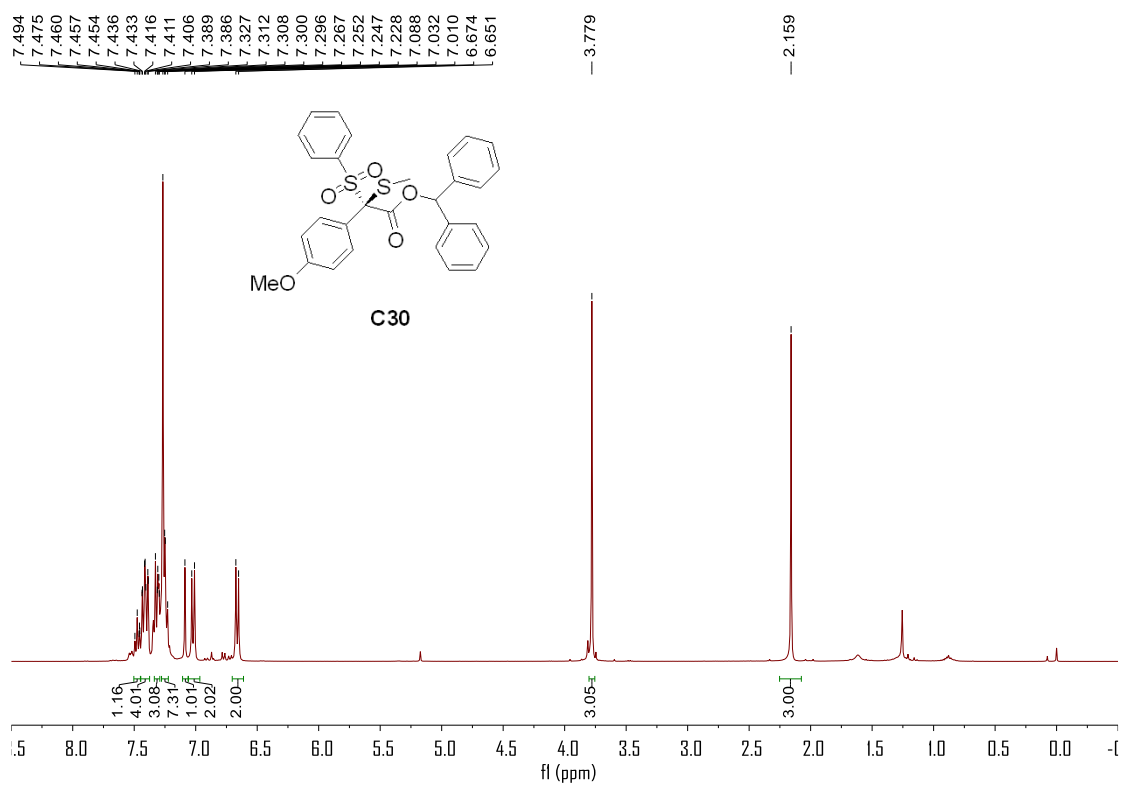

Figure S61.  $^{13}\text{C}\{^1\text{H}\}$  NMR of C30

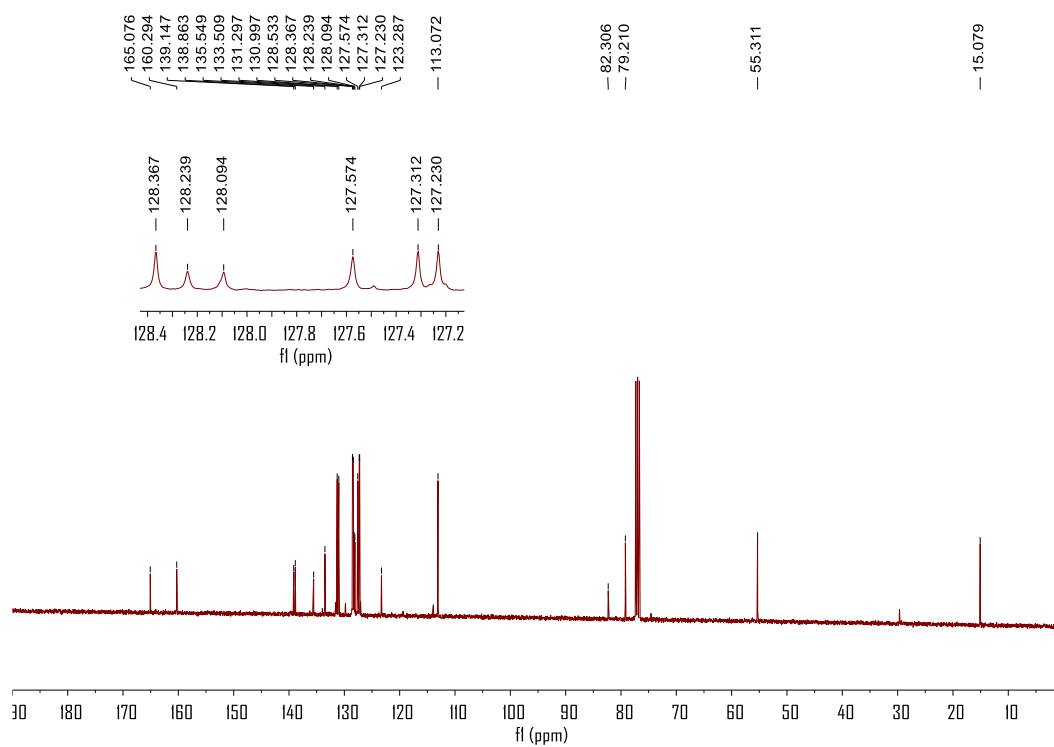

Figure S62.  $^1\text{H}$  NMR of C31

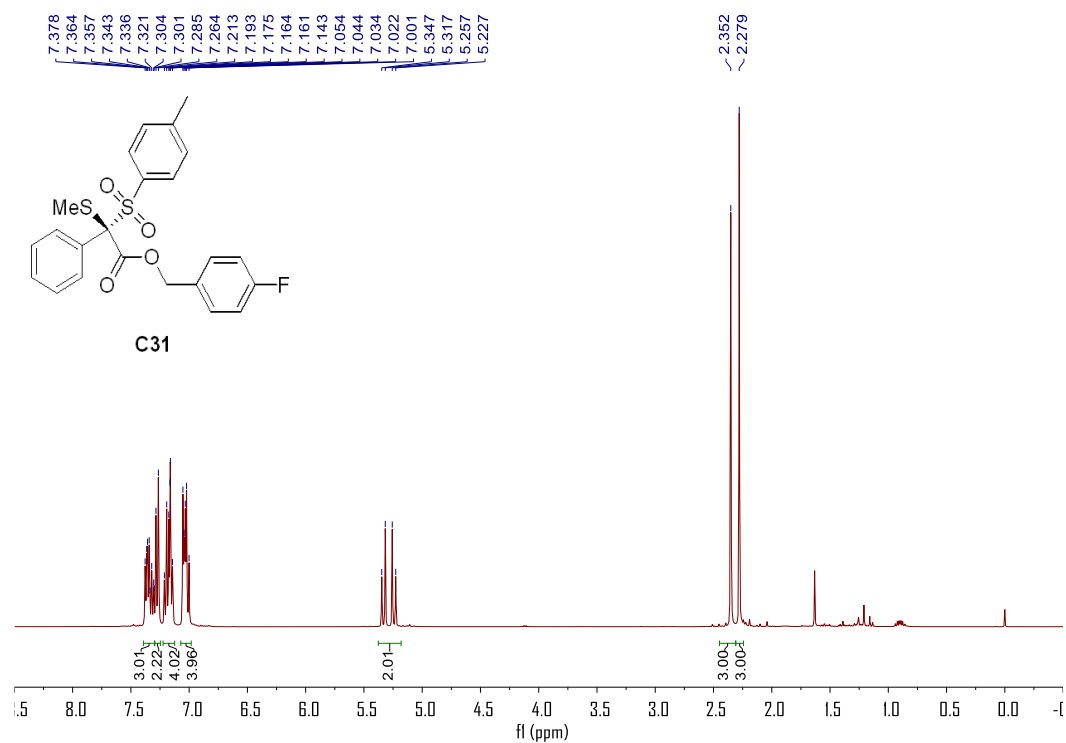

Figure S63.  $^{13}\text{C}\{^1\text{H}\}$  NMR of C31

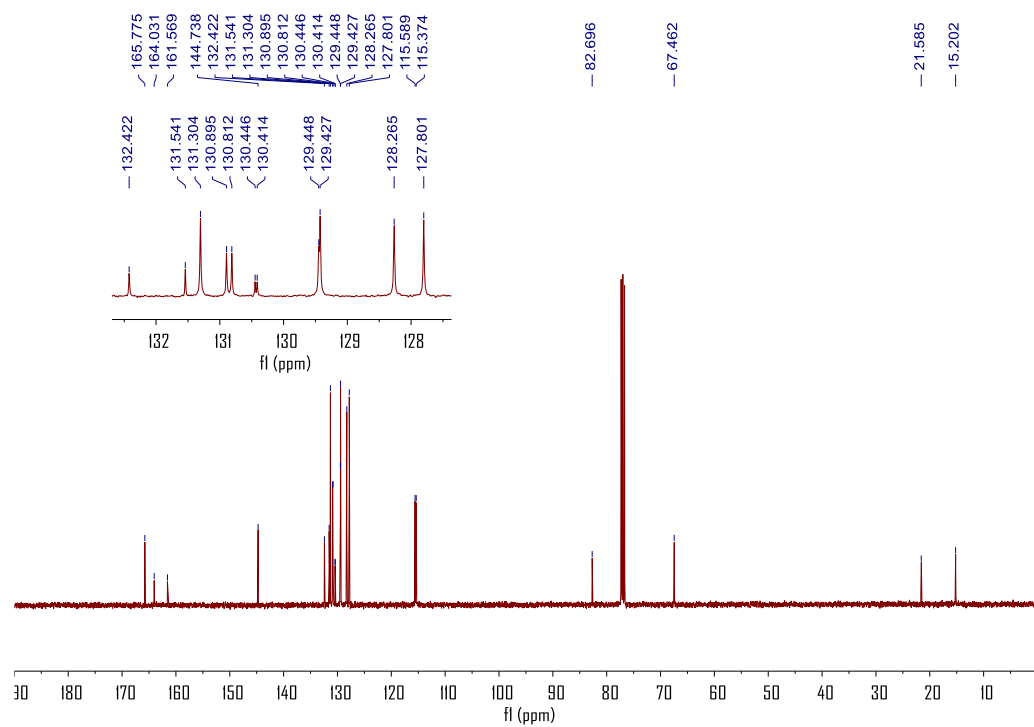

Figure S64.  $^{19}\text{F}$  NMR of C31

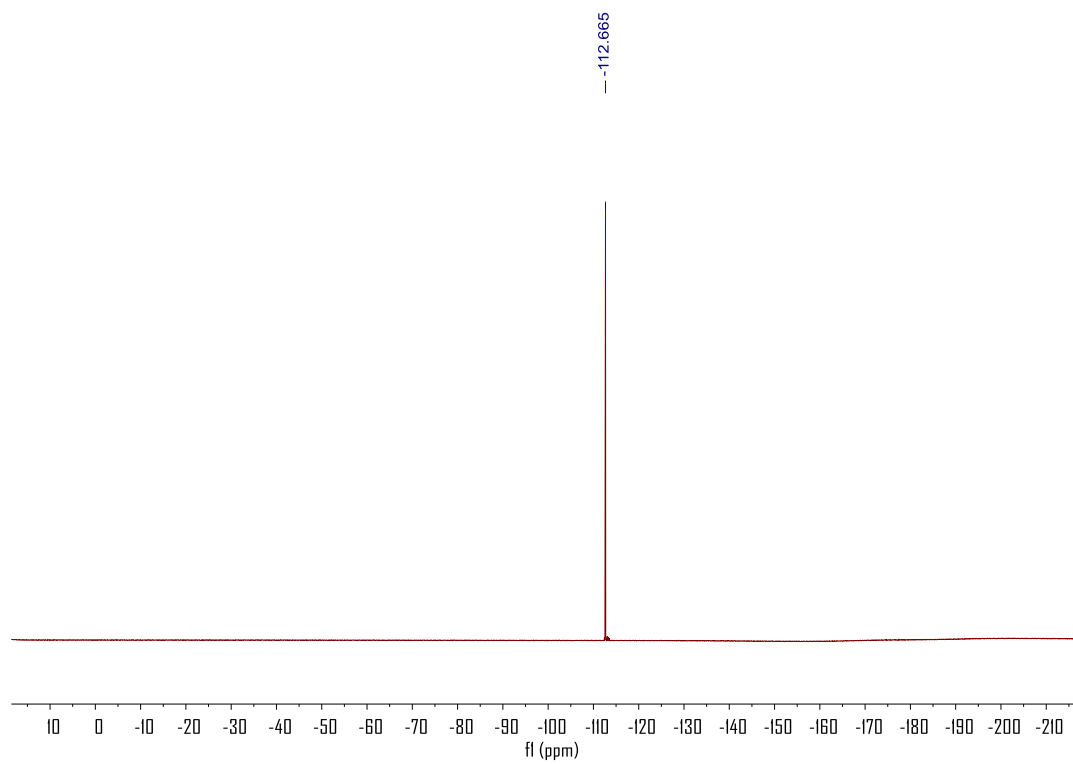

Figure S65.  $^1\text{H}$  NMR of C32

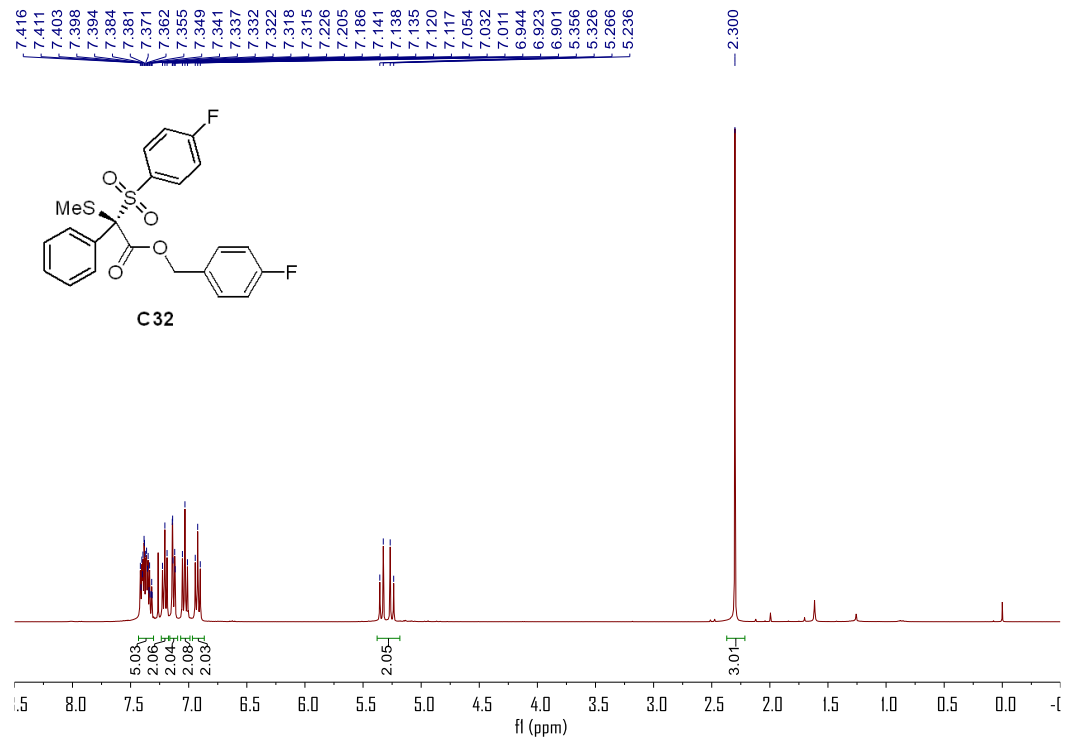

Figure S66.  $^{13}\text{C}\{^1\text{H}\}$  NMR of C32

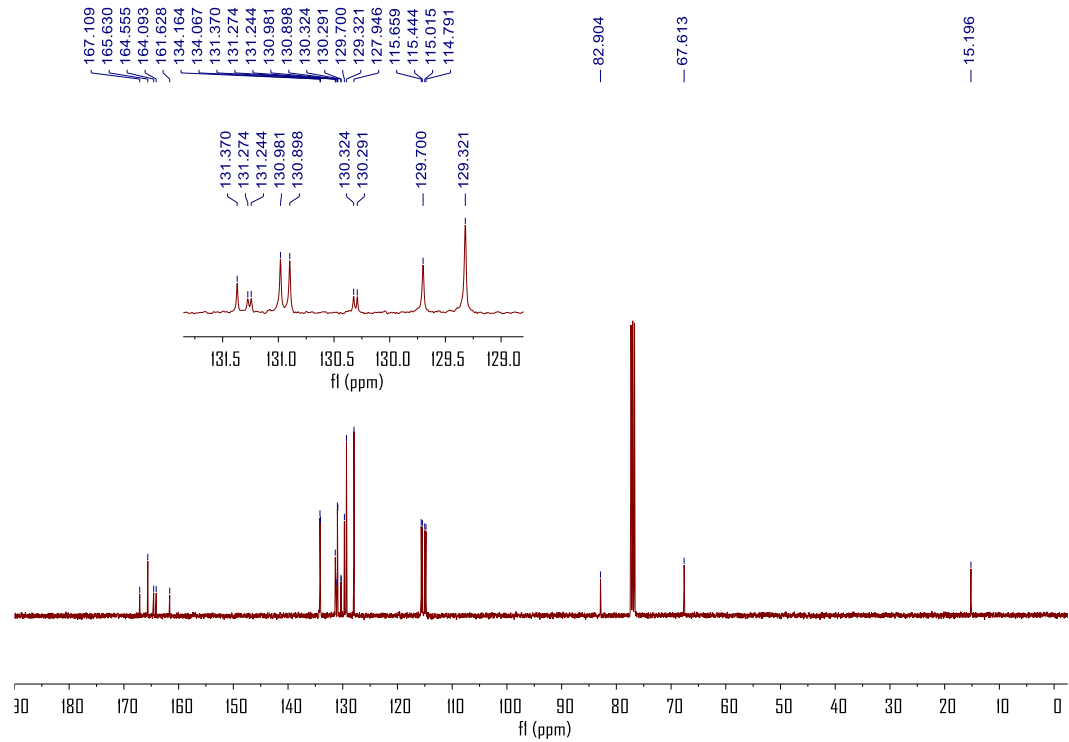

Figure S67.  $^{19}\text{F}$  NMR of C32

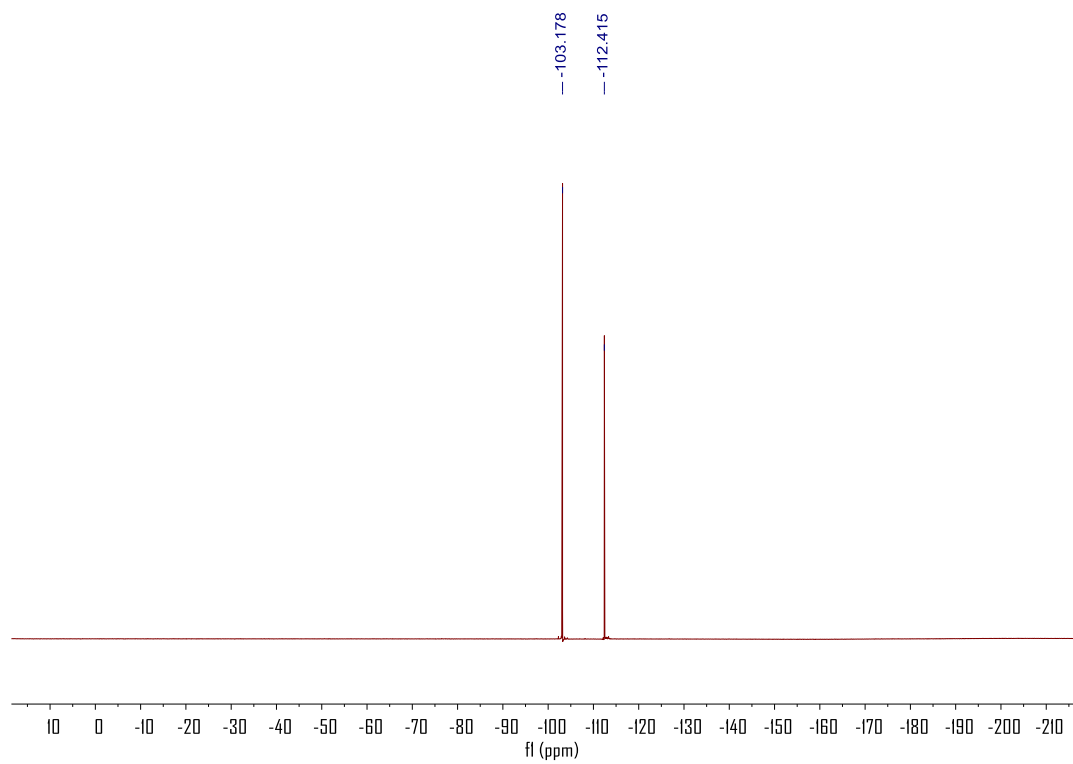

Figure S68.  $^1\text{H}$  NMR of C33

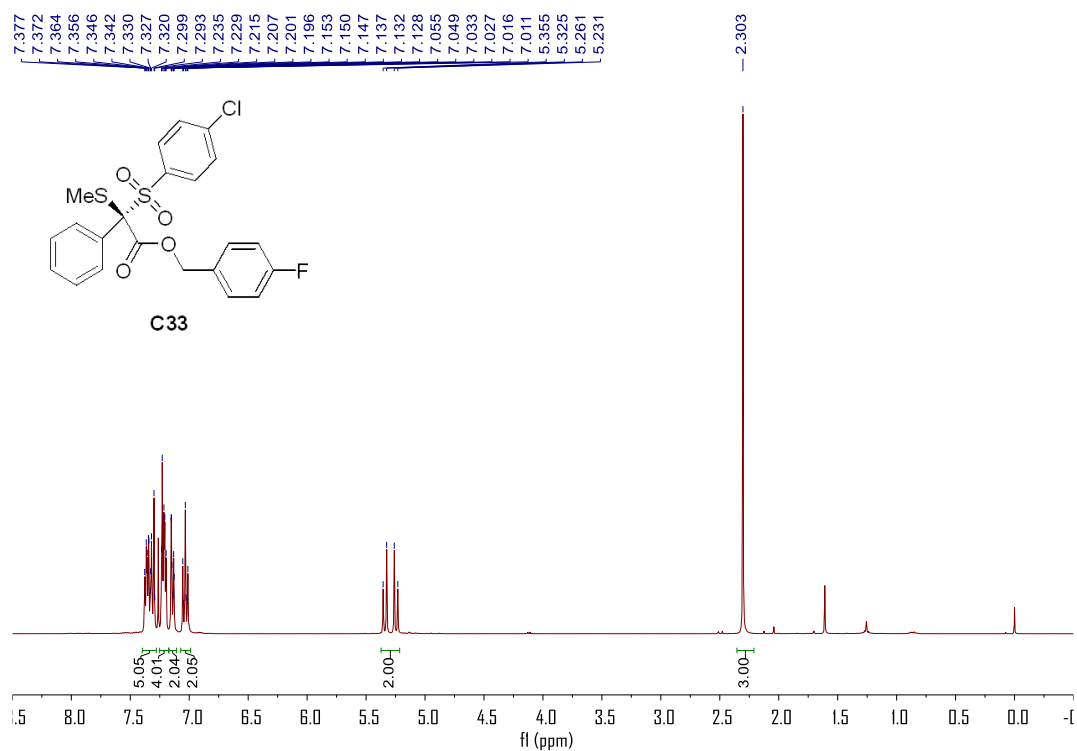

Figure S69.  $^{13}\text{C}\{^1\text{H}\}$  NMR of C33

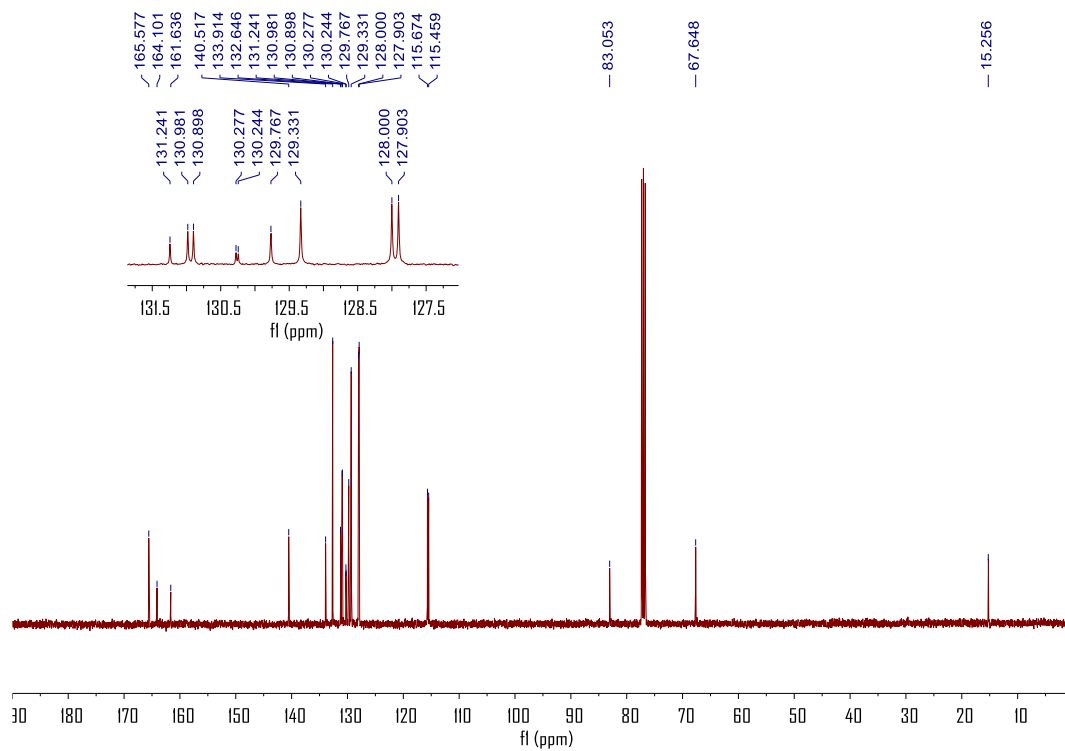

Figure S70.  $^{19}\text{F}$  NMR of C33

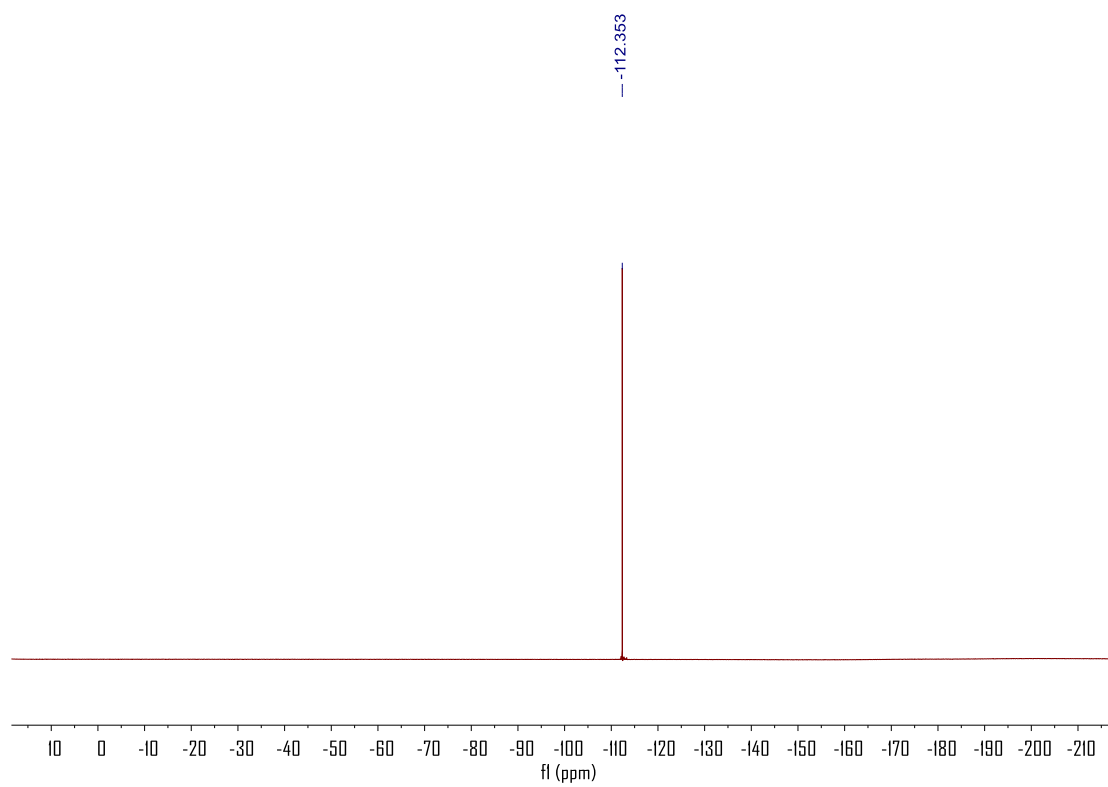

Figure S71.  $^1\text{H}$  NMR of C34

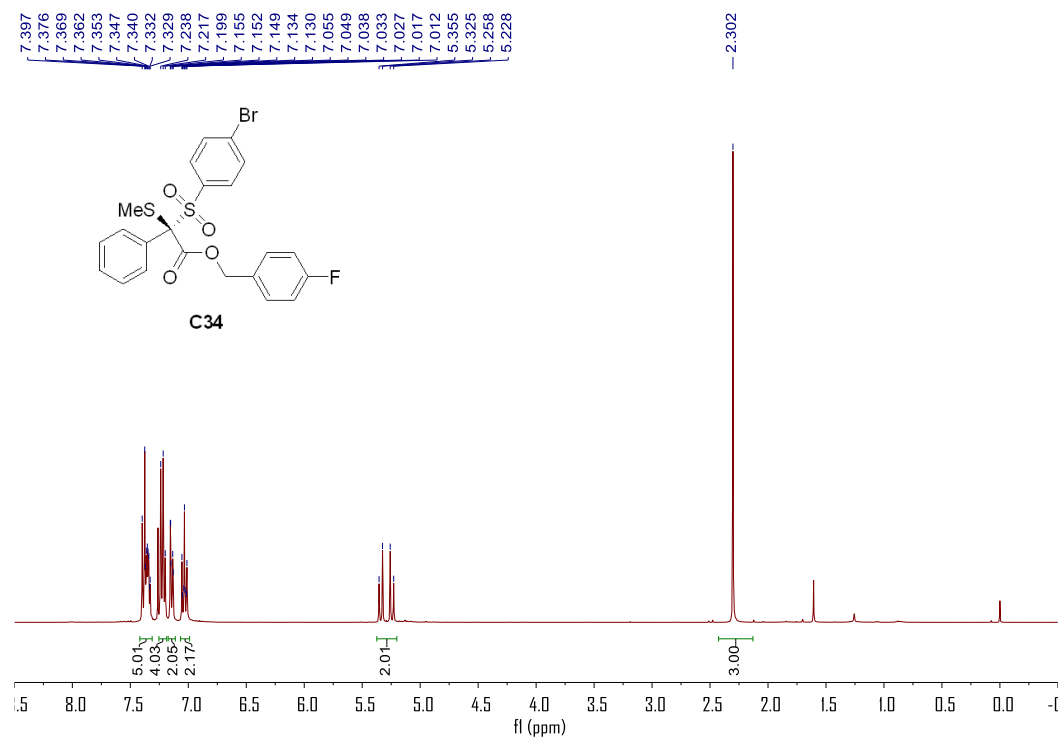

Figure S72.  $^{13}\text{C}\{^1\text{H}\}$  NMR of C34

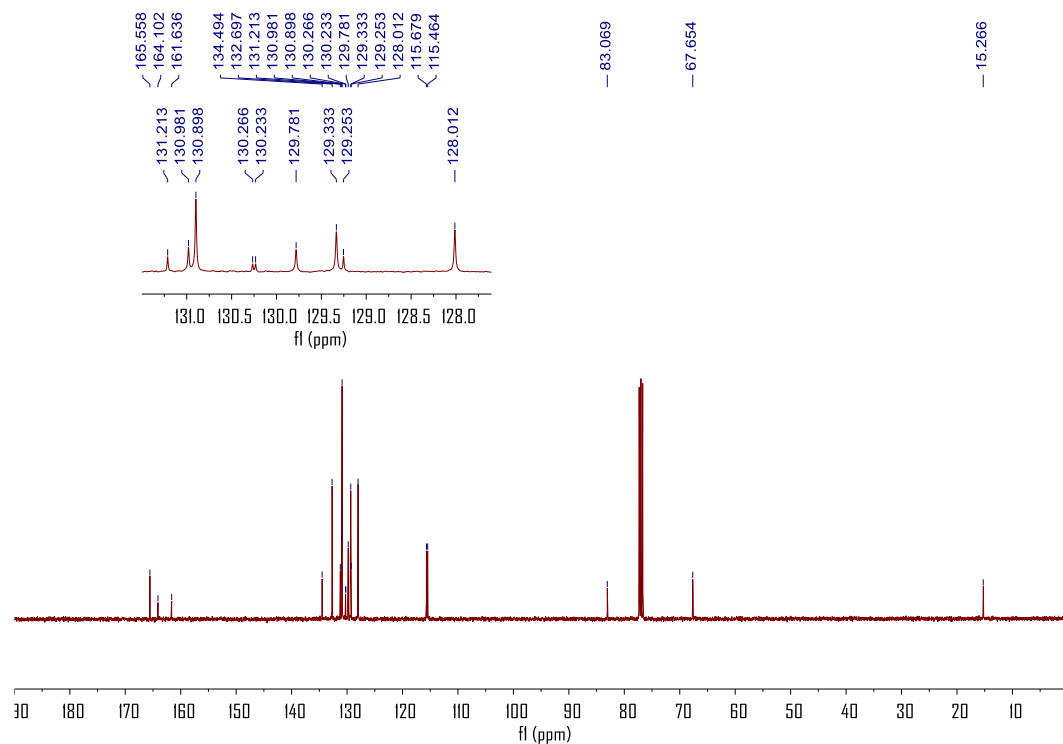



Figure S73.  $^{19}\text{F}$  NMR of C34

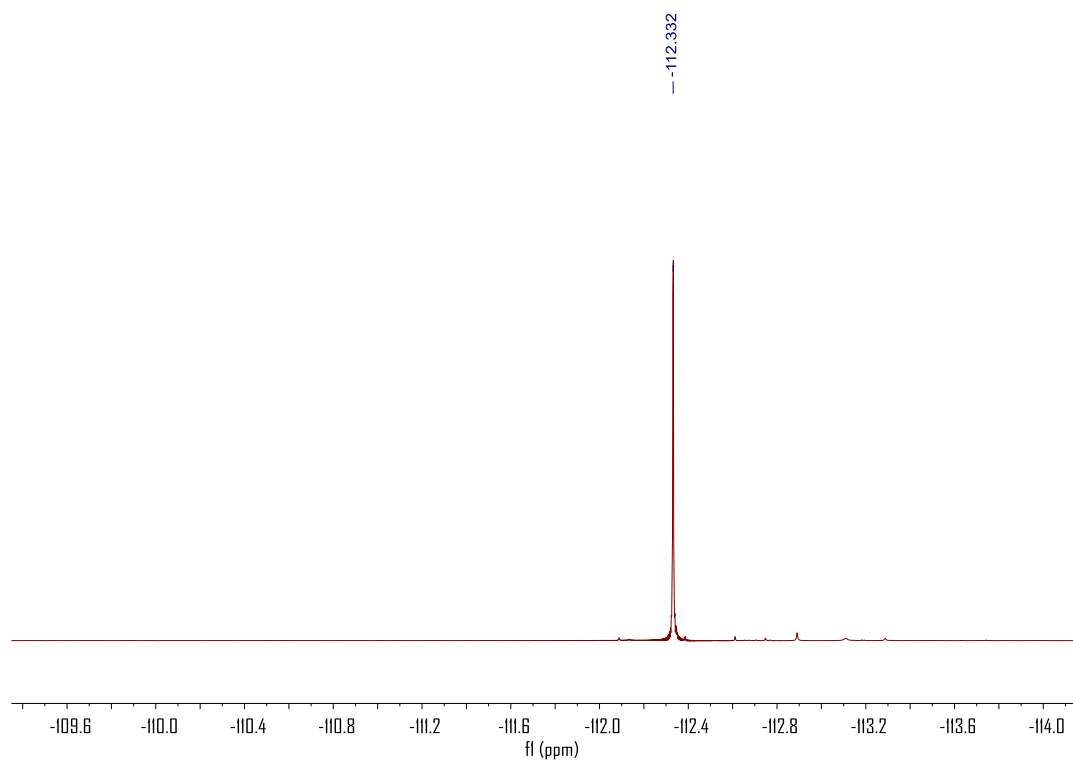

Figure S74.  $^1\text{H}$  NMR of C35

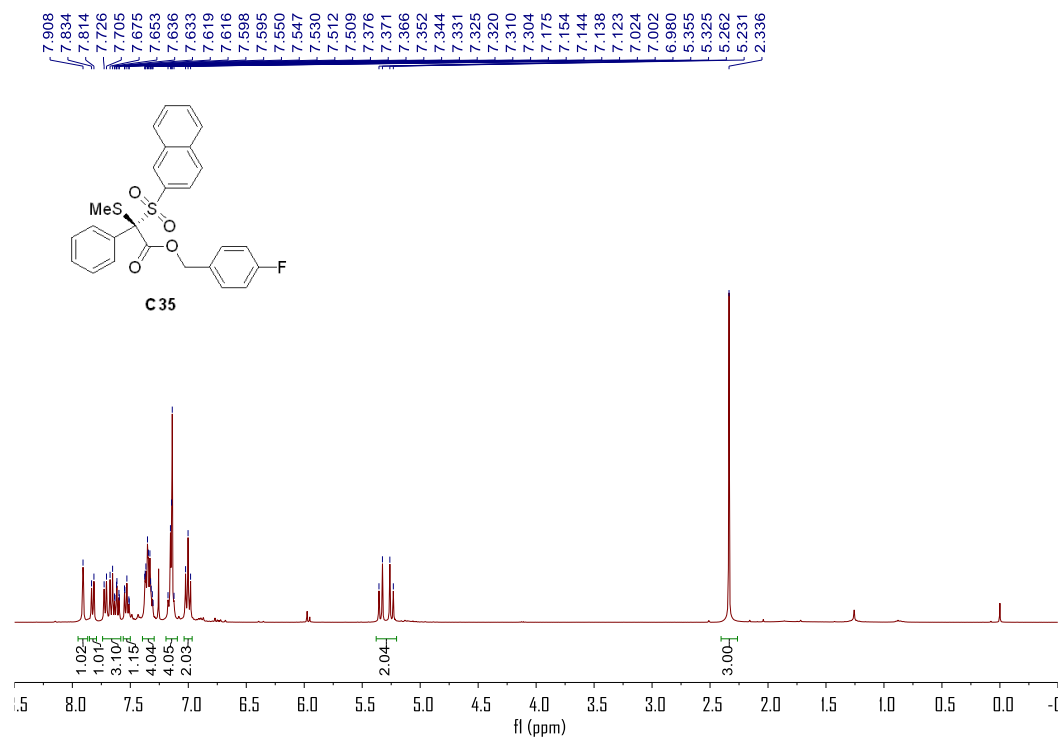

Figure S75.  $^{13}\text{C}\{^1\text{H}\}$  NMR of C35

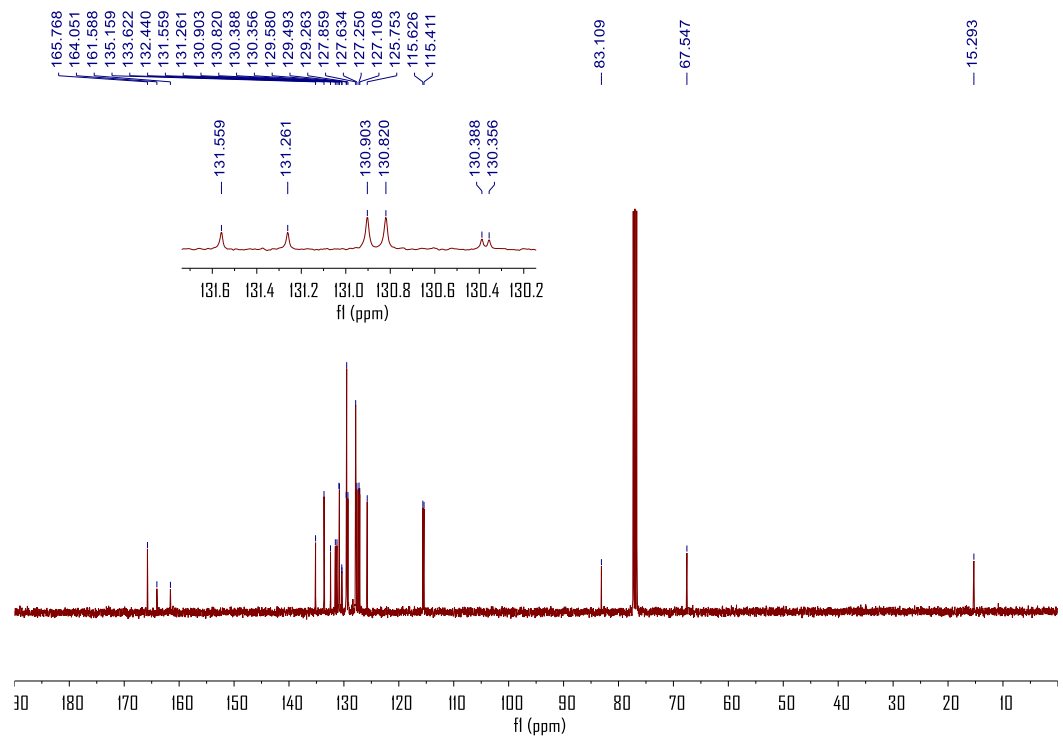

Figure S76.  $^{19}\text{F}$  NMR of C35

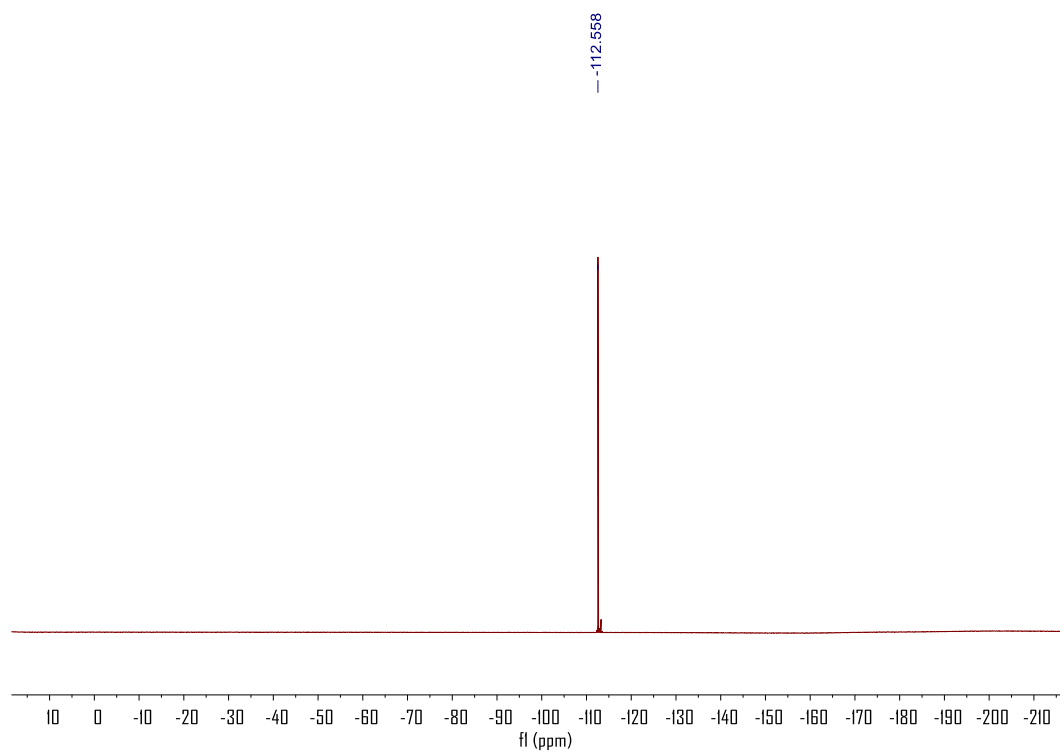

Figure S77.  $^1\text{H}$  NMR of C36

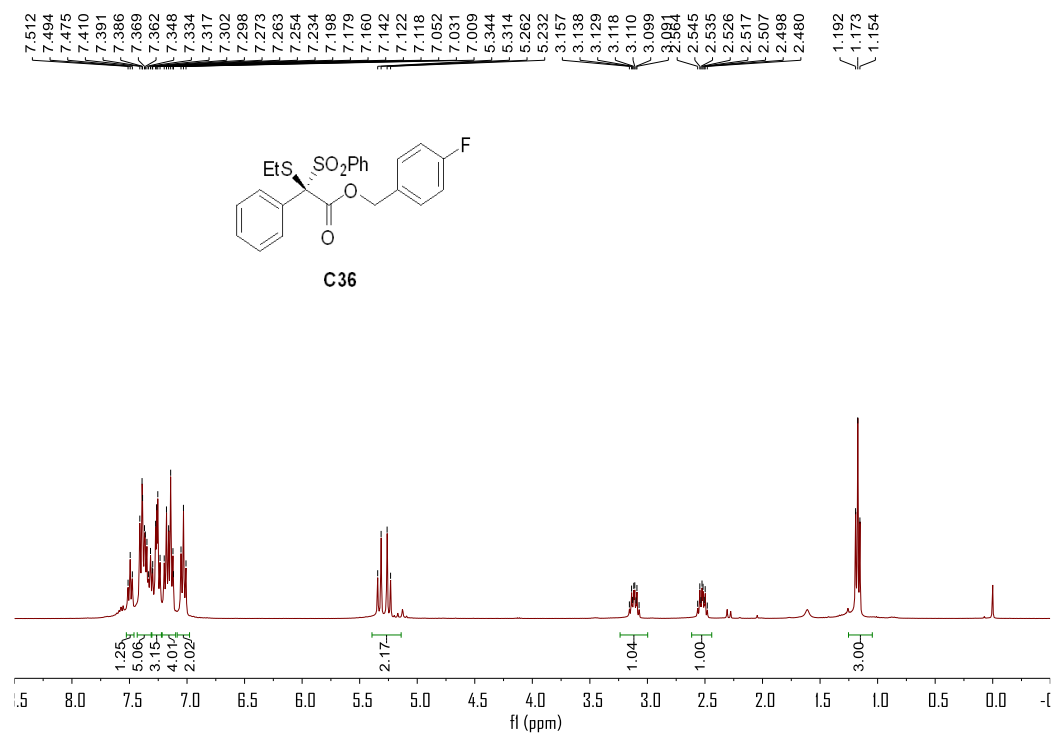

Figure S78.  $^{13}\text{C}\{^1\text{H}\}$  NMR of C36

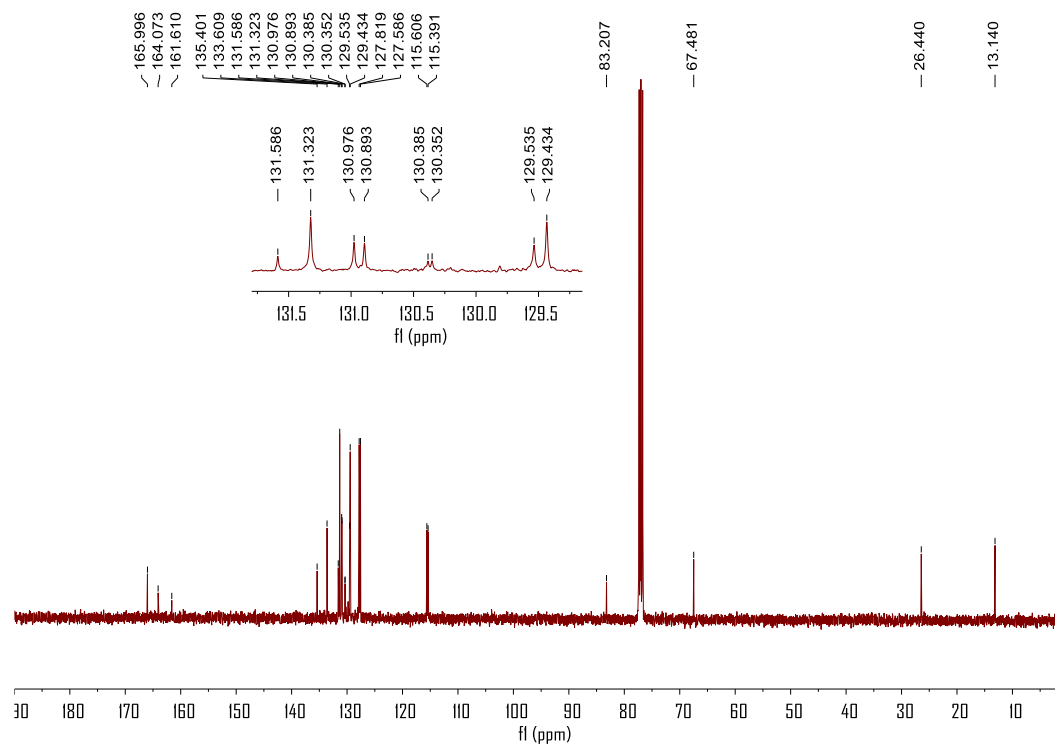

Figure S79.  $^{19}\text{F}$  NMR of C36

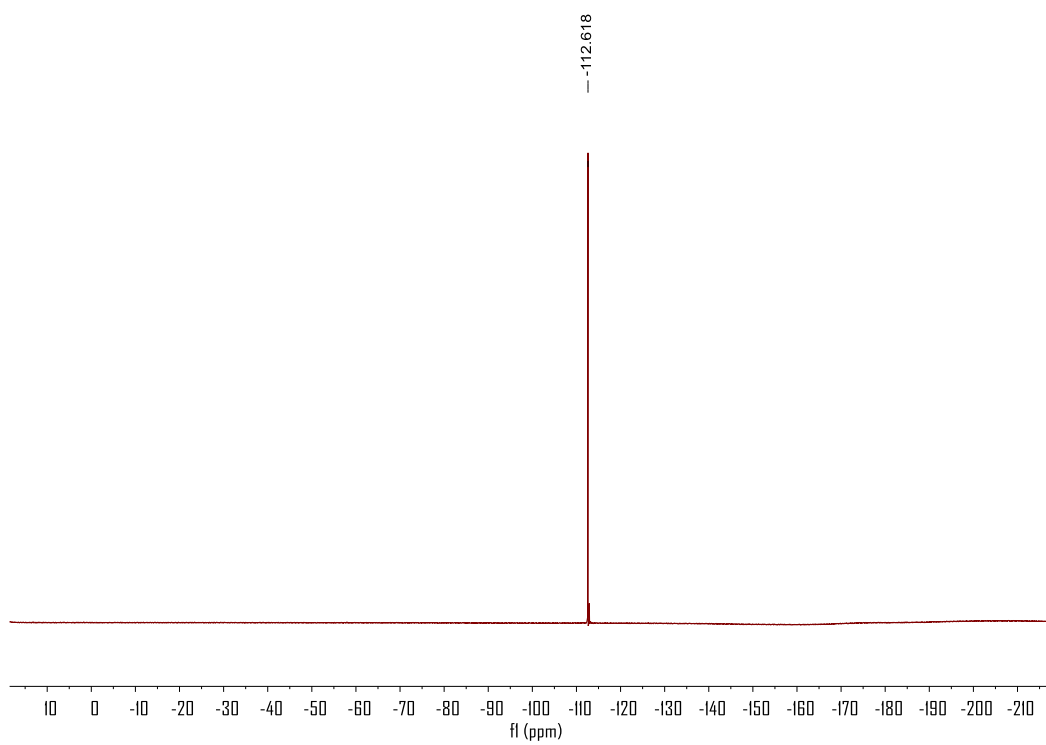

Figure S80.  $^1\text{H}$  NMR of C37

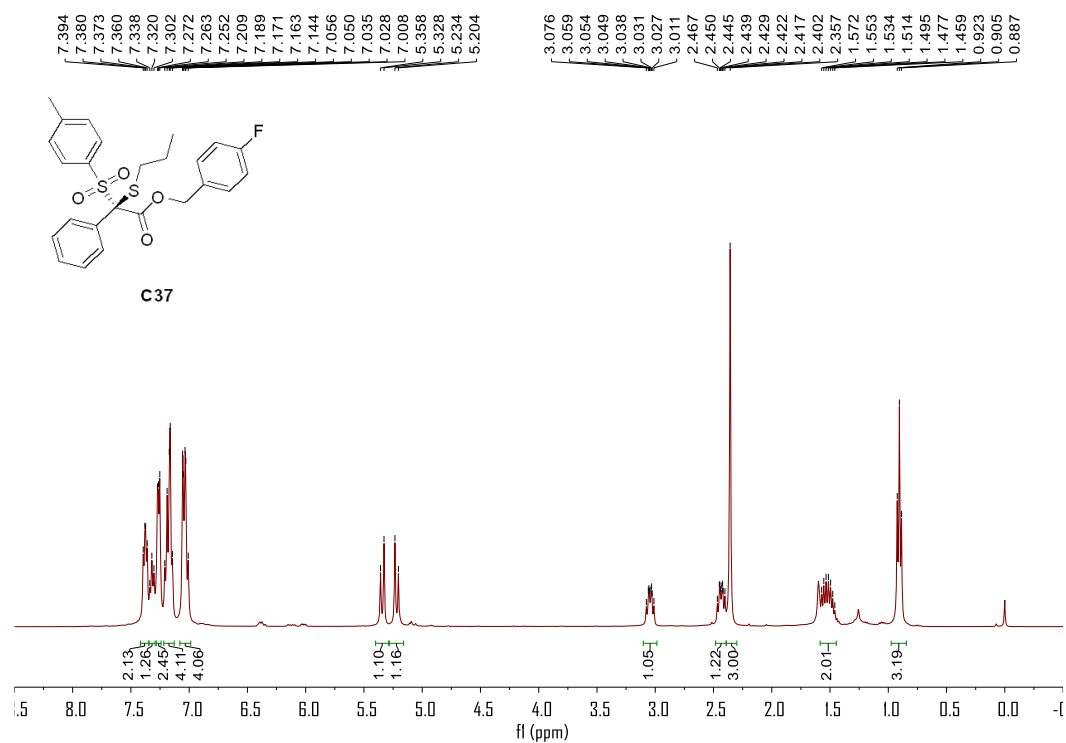

Figure S81.  $^{13}\text{C}\{^1\text{H}\}$  NMR of C37

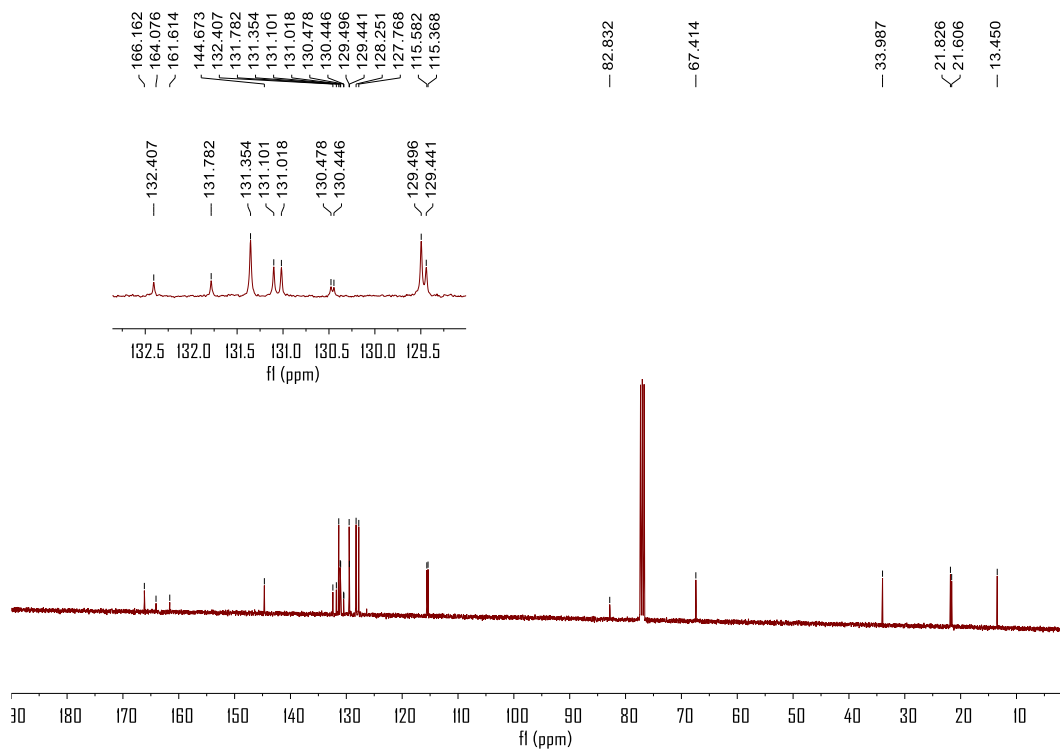

Figure S82.  $^{19}\text{F}$  NMR of C37

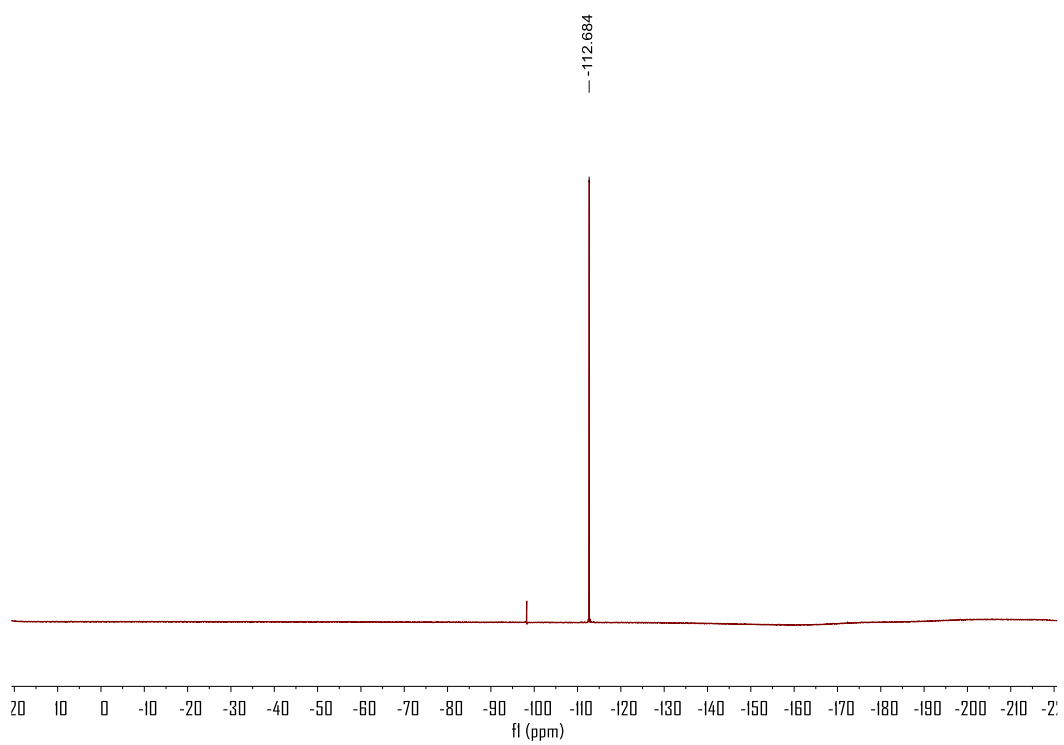

Figure S83.  $^1\text{H}$  NMR of D1

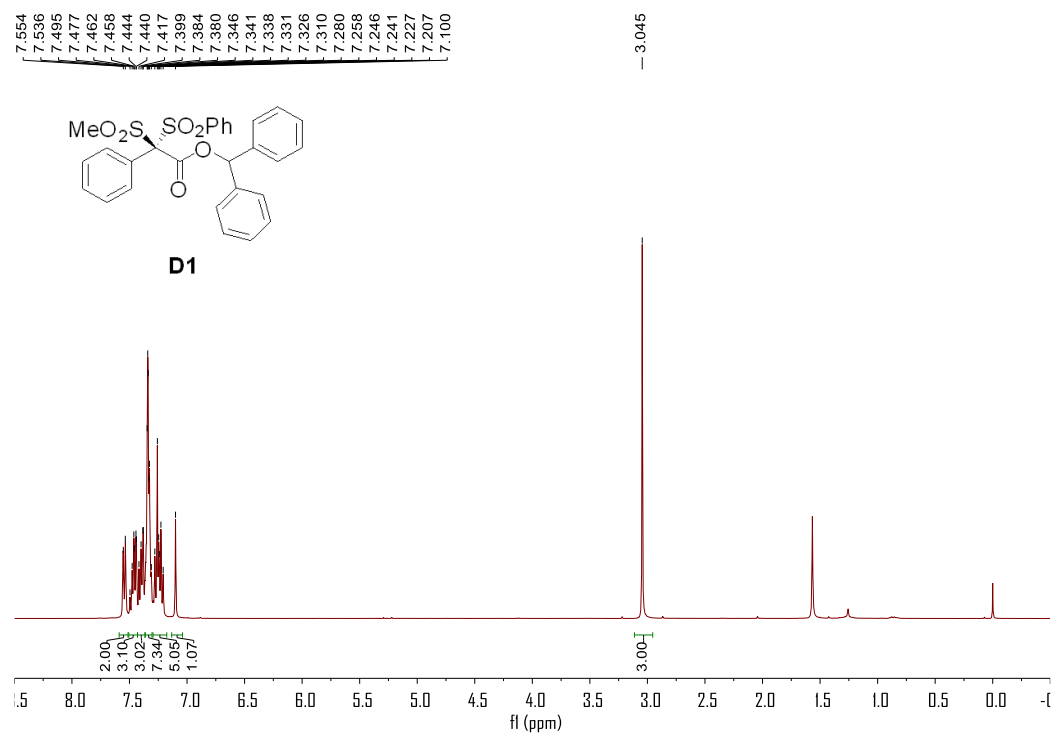

Figure S84.  $^{13}\text{C}\{^1\text{H}\}$  NMR of D1

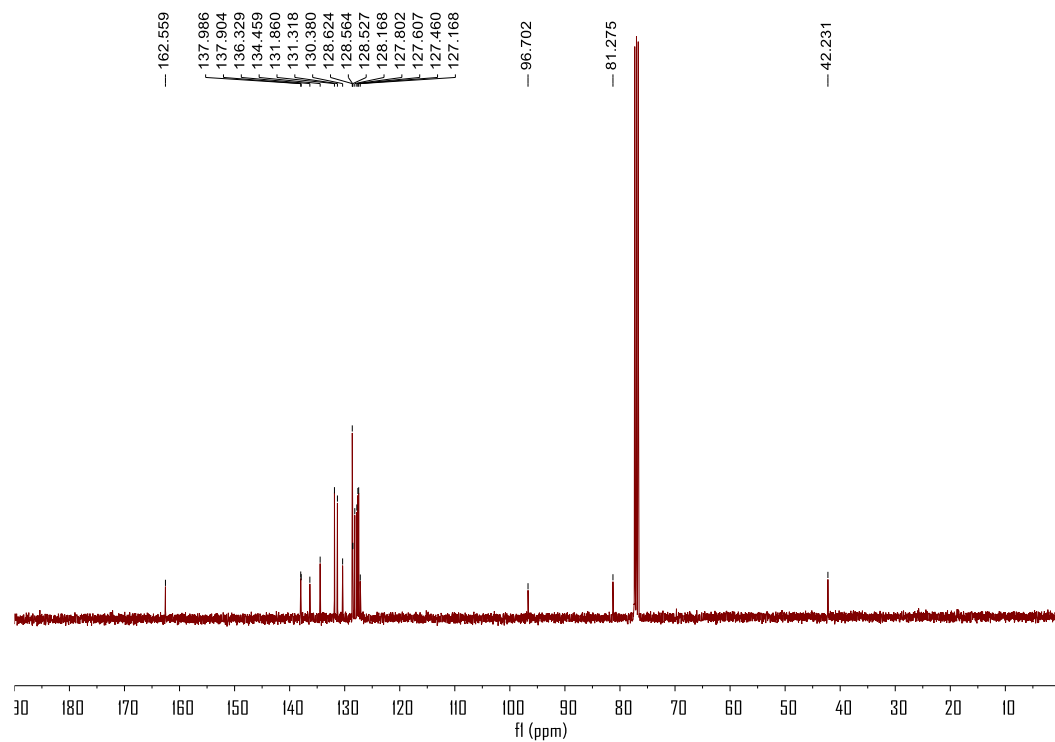



## 9. Unsuccessful substrate scopes.

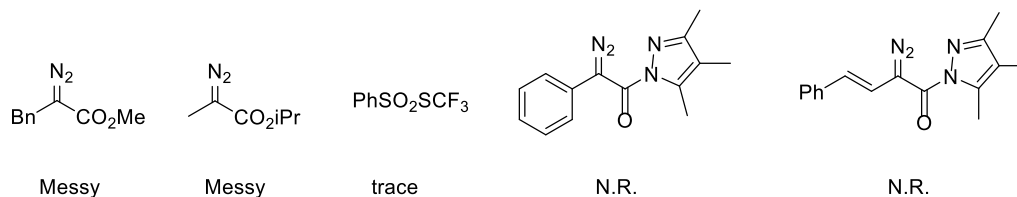

## 10. X-ray crystal structure of product D1

Single crystal of (C<sub>28</sub>H<sub>24</sub>O<sub>6</sub>S<sub>2</sub>) **D1** was recrystallized from mixed solvents of DCM and PE. The absolute configuration of the product **D1** was determined to be (*S*) according to X-ray crystal structural analysis. CCDC 2113309 contains the supplementary crystallographic data which can be obtained free of charge from The Cambridge Crystallographic Data Center.

The colourless crystal in flake-shape, with approximate dimensions of 0.274 × 0.345 × 0.564 mm<sup>3</sup>, was selected and mounted for the single-crystal X-ray diffraction. The data set was collected by Bruker D8 Venture Photon II diffractometer at 173(2)K equipped with micro-focus Cu radiation source (K<sub>α</sub> = 1.54178Å). Applied with face-indexed numerical absorption correction, the structure solution was solved and refinement was processed by SHELXTL (version 6.14) and OLEX 2.3 program package<sup>a, b, c, d</sup>. The structure was analyzed by ADDSYM routine implemented in PLATON suite and no higher symmetry was suggested<sup>e</sup>.

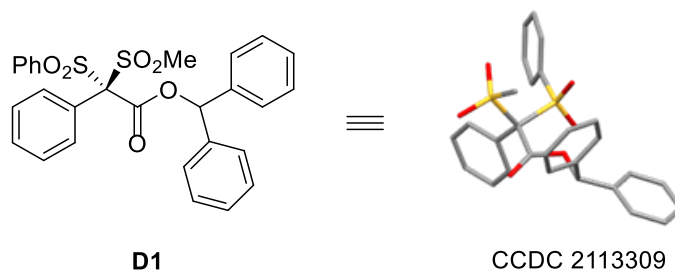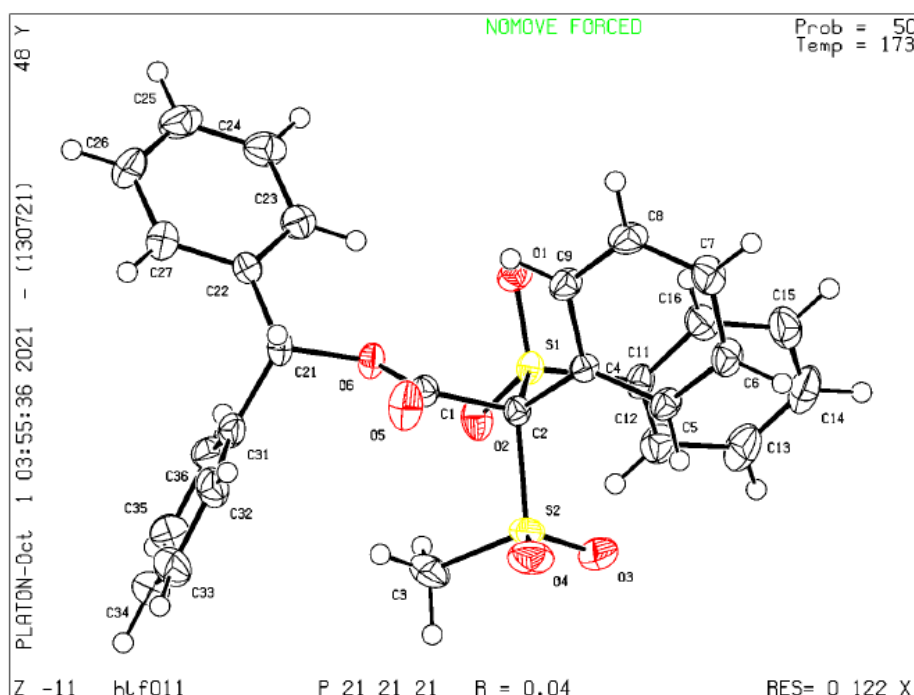

|                                                                                                                               |                                                               |
|-------------------------------------------------------------------------------------------------------------------------------|---------------------------------------------------------------|
| Formula                                                                                                                       | C <sub>28</sub> H <sub>24</sub> O <sub>6</sub> S <sub>2</sub> |
| Formula mass (amu)                                                                                                            | 520.59                                                        |
| Space group                                                                                                                   | P2 <sub>1</sub> 2 <sub>1</sub> 2 <sub>1</sub>                 |
| <i>a</i> (Å)                                                                                                                  | 9.2608 (3)                                                    |
| <i>b</i> (Å)                                                                                                                  | 14.3014 (5)                                                   |
| <i>c</i> (Å)                                                                                                                  | 18.9339 (6)                                                   |
| <i>α</i> (deg)                                                                                                                | 90                                                            |
| <i>β</i> (deg)                                                                                                                | 90                                                            |
| <i>γ</i> (deg)                                                                                                                | 90                                                            |
| <i>V</i> (Å <sup>3</sup> )                                                                                                    | 2507.65 (14)                                                  |
| <i>Z</i>                                                                                                                      | 4                                                             |
| <i>λ</i> (Å)                                                                                                                  | 1.54178                                                       |
| <i>T</i> (K)                                                                                                                  | 173 K                                                         |
| <i>ρ</i> <sub>calcd</sub> (g cm <sup>-3</sup> )                                                                               | 1.379                                                         |
| <i>μ</i> (mm <sup>-1</sup> )                                                                                                  | 2.281                                                         |
| Transmission factors                                                                                                          | 0.375,0.742                                                   |
| <i>θ</i> <sub>max</sub> (deg)                                                                                                 | 68.531                                                        |
| No. of unique data, including <i>F</i> <sub>o</sub> <sup>2</sup> < 0                                                          | 4414                                                          |
| No. of unique data, with <i>F</i> <sub>o</sub> <sup>2</sup> > 2 $\sigma$ ( <i>F</i> <sub>o</sub> <sup>2</sup> )               | 4222                                                          |
| No. of variables                                                                                                              | 327                                                           |
| <i>R</i> ( <i>F</i> ) for <i>F</i> <sub>o</sub> <sup>2</sup> > 2 $\sigma$ ( <i>F</i> <sub>o</sub> <sup>2</sup> ) <sup>a</sup> | 0.0373                                                        |
| <i>R</i> <sub>w</sub> ( <i>F</i> <sub>o</sub> <sup>2</sup> ) <sup>b</sup>                                                     | 0.0973                                                        |
| Goodness of fit                                                                                                               | 1.090                                                         |

## 11. References

- (1) Z. P. Yu, X. H. Liu, L. Zhou, L. L. Lin and X. M. Feng, *Angew. Chem., Int. Ed.*, **2009**, *48*, 5195.
- (2) a) W. G. Wang, X. L. Peng, F. Wei, C. H. Tung, Z. H. Xu, *Angew. Chem. Int. Ed.*, **2016**, *55*, 649; b) H. Li, C. Shan, C. Tung and Z. Xu, *Chem. Sci.*, **2017**, *8*, 2610; c) C. Q. Rao, S. Y. Mai and Q. L. Song, *Chem. Commun.*, **2018**, *54*, 5964.
- (3) a) M. Y. Hu, J. Rong, W. J. Miao, C. F. Ni, Y. X. Han and J. B. Hu, *Org. Lett.*, **2014**, *16*, 2030; b) J. X. Guo, T. Zhou, B. Xu., S. F. Zhu and Q. L. Zhou, *Chem. Sci.*, **2016**, *7*, 1104.

<sup>a</sup>G. M. Sheldrick, *Acta Cryst.* **2008**, *A64*, 112.

<sup>b</sup>G. M. Sheldrick, *Acta Cryst.* **2015**, *A71*, 3.

<sup>c</sup>G. M. Sheldrick, *Acta Cryst.* **2015**, *C71*, 3.

<sup>d</sup>O. V. Dolomanov, L. J. Bourhis, R. J. Gildea, J. A. K. Howard, H. Puschmann, *J. Appl. Cryst.* **2009**, *42*, 339.

<sup>e</sup>A. L. Spek, *J. Appl. Cryst.* **2003**, *36*, 7.
